# Supplementary material for: Extreme thermal fluctuations from climate change unexpectedly accelerate demographic collapse of vertebrates with temperature-dependent sex determination
Source: PubMed Central journal article supplement (PMC6414666; doi:10.1038/s41598-019-40597-4), 2019-03-12
Supplement: 41598_2019_40597_MOESM1_ESM.pdf [file 41598_2019_40597_MOESM1_ESM.pdf]

# Extreme thermal fluctuations from climate change unexpectedly accelerate demographic collapse of vertebrates with temperature-dependent sex determination

Nicole Valenzuela, Robert Literman, Jennifer L. Neuwald, Beatriz Mizoguchi, John B. Iverson, Julia L. Riley, and Jacqueline D. Litzgus.

**Figure S1:** Monthly average temperatures (°C) for two locations where painted turtle nests were monitored, Ames (IA) and Birmingham (IA) (to which the closest weather station is Fairfield, IA). The panels below illustrate monthly average temperatures for June (panel A), July (panel B) and August (panel C) for the years 1893-2018 obtained from the Iowa Environmental Mesonet Climodat reports, which provide monthly summaries of daily climate record data from The National Weather Service [NWS] Cooperative Observer Program [COOP]

(<https://mesonet.agron.iastate.edu/climodat/index.phtml?network=IACLIMATE&station=IA0200&report=16>).

Averages across years are shown as dotted lines for Ames and dashed lines for Fairfield. Yellow boxes denote the period in 2006-2010 when nests were monitored in the field in Iowa and which produced male-biased sex ratios exclusively. While the period 2006-2010 is relatively cold (particularly in July), the monthly averages during those years are not unprecedented, as illustrated by the distribution of temperatures for the years 1893-2018 (panel D). Thus, it is expected that male-producing years are not an uncommon occurrence at this locations.

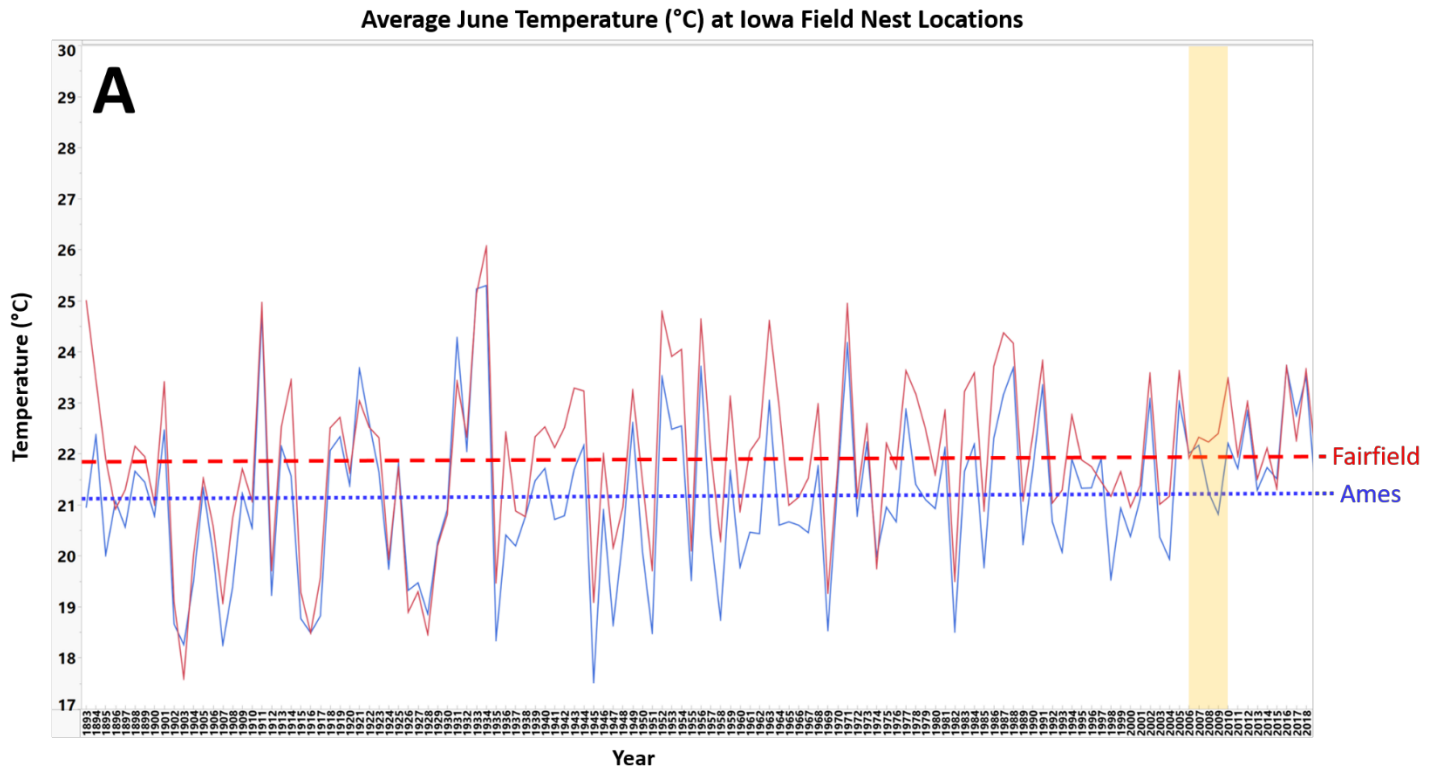

Average July Temperature (°C) at Iowa Field Nest Locations

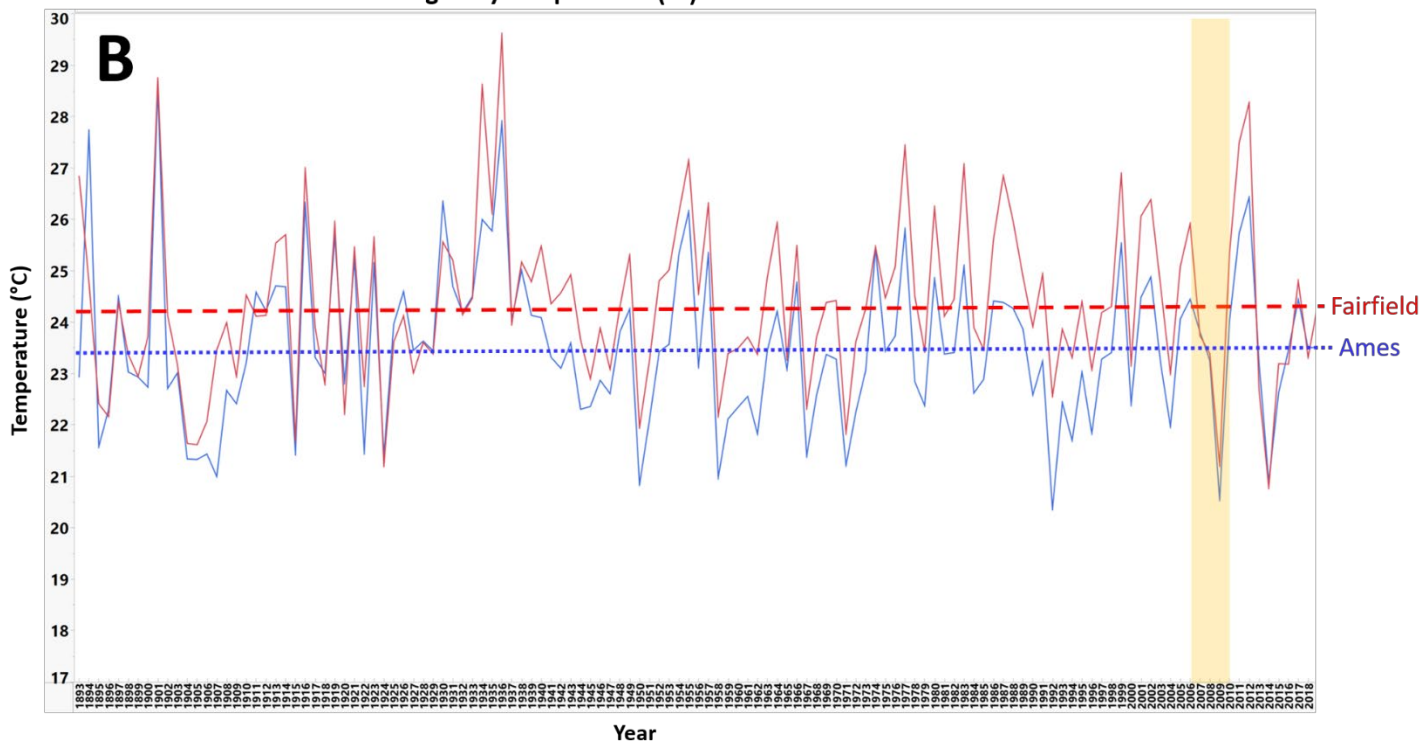

Average August Temperature (°C) at Iowa Field Nest Locations

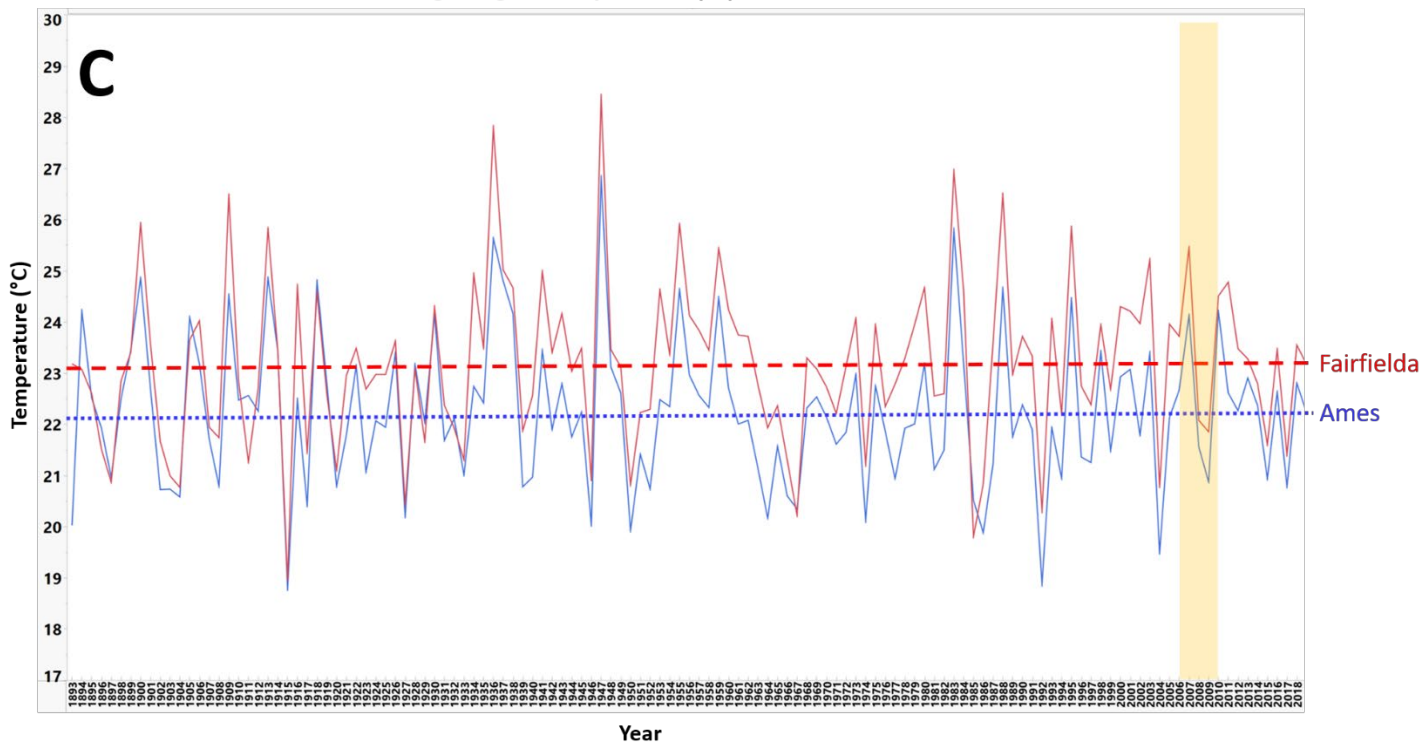

D

| Year | JUN-Ames | JUL-Ames | AUG-Ames | JUN-Fairfield | JUL-Fairfield | AUG-Fairfield |
|------|----------|----------|----------|---------------|---------------|---------------|
| 2006 | 22.0     | 24.4     | 22.7     | 21.9          | 25.9          | 23.7          |
| 2007 | 22.2     | 23.8     | 24.1     | 22.3          | 23.7          | 25.5          |
| 2008 | 21.3     | 23.3     | 21.6     | 22.2          | 23.4          | 22.1          |
| 2009 | 20.8     | 20.5     | 20.9     | 22.4          | 21.2          | 21.9          |
| 2010 | 22.2     | 24.0     | 24.2     | 23.5          | 25.3          | 24.5          |

Distributions

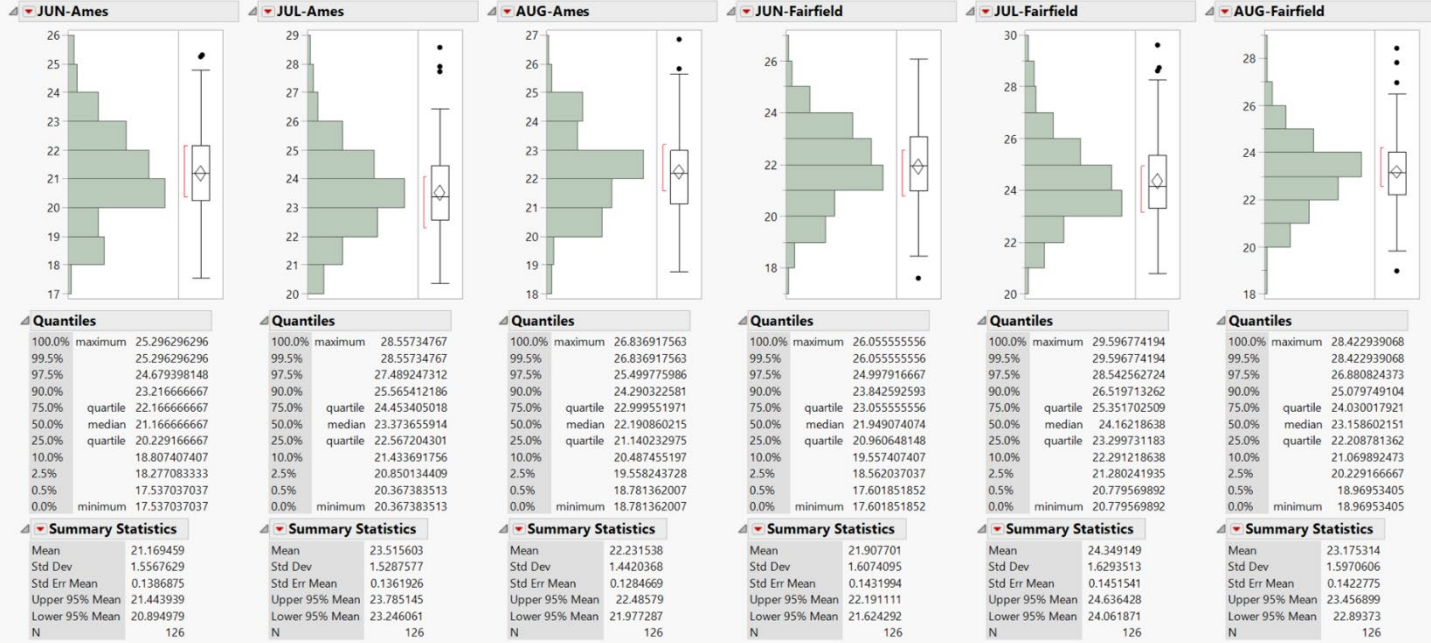

## Hourly thermal profiles used in the present study

| Sex Ratio Wild Nest:  |      | NatMale  | NatMale | NatMale | NatMale | semiNat<br>Fem | semiNat<br>Fem | semiNat<br>Fem | semiNat<br>Fem | NatFem   | NatFem | NatFem   | NatFem |
|-----------------------|------|----------|---------|---------|---------|----------------|----------------|----------------|----------------|----------|--------|----------|--------|
| Original Recorded At: |      | IA       | IA      | IA      | IA      | IA             | IA             | IA             | IA             | NE       | NE     | ON       | ON     |
| Added Variance:       |      | Original | ±2°C    | ±4°C    | ±6°C    | Original       | ±2°C           | ±4°C           | ±6°C           | Original | ±6°C   | Original | ±6°C   |
| Day                   | Hour | Temp     | Temp    | Temp    | Temp    | Temp           | Temp           | Temp           | Temp           | Temp     | Temp   | Temp     | Temp   |
| 1                     | 1    | 25.9     | 27.4    | 32.6    | 32.2    | 32.5           | 34.4           | 36.4           | 40.5           | 20       | 19.8   | 22.4     | 20.3   |
| 1                     | 2    | 27.9     | 30.2    | 24.6    | 37.6    | 32.5           | 34.4           | 36.4           | 40.5           | 20       | 19.9   | 21.3     | 17.7   |
| 1                     | 3    | 23.5     | 24.1    | 26.1    | 25.9    | 31.5           | 33             | 34.6           | 37.8           | 19.9     | 19.7   | 20.3     | 15.4   |
| 1                     | 4    | 24.3     | 25.2    | 27      | 28      | 30             | 30.9           | 31.9           | 33.8           | 19.7     | 19.3   | 19.4     | 13.4   |
| 1                     | 5    | 24.8     | 25.9    | 27.9    | 29.3    | 29.5           | 30.2           | 31             | 32.5           | 19.5     | 18.8   | 18.6     | 11.5   |
| 1                     | 6    | 25.3     | 26.6    | 28.8    | 30.7    | 27.5           | 27.4           | 27.4           | 27.2           | 19.3     | 18.3   | 17.9     | 10     |
| 1                     | 7    | 25.8     | 27.3    | 28.1    | 32      | 28             | 28.1           | 28.3           | 28.5           | 19.1     | 17.9   | 17.2     | 8.4    |
| 1                     | 8    | 25.4     | 26.7    | 26.1    | 30.9    | 28             | 28.1           | 28.3           | 28.5           | 18.8     | 17.2   | 16.7     | 7.1    |
| 1                     | 9    | 24.3     | 25.2    | 24.5    | 28      | 28             | 28.1           | 28.3           | 28.5           | 18.7     | 16.9   | 16.5     | 6.8    |
| 1                     | 10   | 23.4     | 23.9    | 23.6    | 25.6    | 27.5           | 27.4           | 27.4           | 27.2           | 18.6     | 16.7   | 17.2     | 8.4    |
| 1                     | 11   | 22.9     | 23.2    | 22.5    | 24.3    | 27.5           | 27.4           | 27.4           | 27.2           | 18.6     | 16.8   | 19       | 12.5   |
| 1                     | 12   | 22.3     | 22.4    | 21.4    | 22.7    | 27             | 26.7           | 26.5           | 25.9           | 18.8     | 17.1   | 21.7     | 18.6   |
| 1                     | 13   | 21.7     | 21.6    | 20.5    | 21.1    | 27             | 26.7           | 26.5           | 25.9           | 19.2     | 18     | 24.6     | 25.2   |
| 1                     | 14   | 21.2     | 20.9    | 19.6    | 19.7    | 26.5           | 26             | 25.6           | 24.5           | 19.5     | 18.8   | 27       | 30.8   |
| 1                     | 15   | 20.7     | 20.2    | 18.9    | 18.4    | 26.5           | 26             | 25.6           | 24.5           | 20       | 19.8   | 29.2     | 36     |
| 1                     | 16   | 20.3     | 19.6    | 18      | 17.4    | 26.5           | 26             | 25.6           | 24.5           | 20.7     | 21.5   | 30.7     | 39.4   |
| 1                     | 17   | 19.8     | 18.9    | 17.1    | 16      | 26.5           | 26             | 25.6           | 24.5           | 21.3     | 22.9   | 32.1     | 42.6   |
| 1                     | 18   | 19.3     | 18.2    | 16.2    | 14.7    | 26             | 25.3           | 24.7           | 23.2           | 21.8     | 24     | 32.2     | 42.7   |
| 1                     | 19   | 18.8     | 17.5    | 16.2    | 13.4    | 26             | 25.3           | 24.7           | 23.2           | 22       | 24.5   | 31.9     | 42     |
| 1                     | 20   | 18.8     | 17.5    | 15.3    | 13.4    | 26             | 25.3           | 24.7           | 23.2           | 22       | 24.6   | 31.1     | 40.3   |
| 1                     | 21   | 18.3     | 16.8    | 15.3    | 12      | 26             | 25.3           | 24.7           | 23.2           | 22       | 24.5   | 29.8     | 37.3   |
| 1                     | 22   | 18.3     | 16.8    | 15.5    | 12      | 26             | 25.3           | 24.7           | 23.2           | 20.6     | 21.4   | 28.2     | 33.7   |
| 1                     | 23   | 18.4     | 16.9    | 15.5    | 12.3    | 26             | 25.3           | 24.7           | 23.2           | 20.5     | 21.1   | 26.7     | 30.1   |
| 1                     | 24   | 18.4     | 16.9    | 17      | 12.3    | 26             | 25.3           | 24.7           | 23.2           | 20.7     | 21.6   | 25.3     | 26.9   |
| 2                     | 25   | 19.1     | 18.1    | 18.5    | 14.8    | 26             | 25.4           | 24.7           | 23.3           | 20.9     | 19.4   | 24.1     | 21.9   |
| 2                     | 26   | 19.9     | 19.2    | 19.2    | 17      | 26.5           | 26.1           | 25.6           | 24.7           | 20.8     | 19.2   | 23       | 19.4   |
| 2                     | 27   | 20.3     | 19.8    | 20.3    | 18      | 27             | 26.8           | 26.5           | 26             | 20.5     | 18.6   | 22.1     | 17.3   |
| 2                     | 28   | 20.9     | 20.6    | 22.4    | 19.6    | 28             | 28.2           | 28.3           | 28.7           | 20.3     | 18.1   | 21.2     | 15.3   |
| 2                     | 29   | 22.1     | 22.3    | 24.6    | 22.8    | 28.5           | 28.9           | 29.2           | 30             | 20       | 17.5   | 20.4     | 13.5   |
| 2                     | 30   | 23.3     | 24      | 26.2    | 26      | 29.5           | 30.3           | 31             | 32.6           | 19.8     | 16.9   | 19.8     | 12.1   |
| 2                     | 31   | 24.2     | 25.2    | 26      | 28.4    | 30             | 31             | 31.9           | 34             | 19.5     | 16.2   | 19.3     | 10.9   |
| 2                     | 32   | 24.1     | 25.1    | 25.3    | 28.1    | 30             | 31             | 31.9           | 34             | 19.2     | 15.6   | 19       | 10.4   |
| 2                     | 33   | 23.7     | 24.5    | 24.8    | 27.1    | 30             | 31             | 31.9           | 34             | 18.9     | 15     | 19       | 10.2   |
| 2                     | 34   | 23.4     | 24.1    | 24.1    | 26.3    | 29             | 29.6           | 30.1           | 31.3           | 17.7     | 12.2   | 19.6     | 11.7   |
| 2                     | 35   | 23       | 23.5    | 23.7    | 25.2    | 28.5           | 28.9           | 29.2           | 30             | 17.3     | 11.3   | 21.2     | 15.3   |
| 2                     | 36   | 22.8     | 23.3    | 22.8    | 24.7    | 28.5           | 28.9           | 29.2           | 30             | 17.9     | 12.5   | 23.2     | 20     |
| 2                     | 37   | 22.3     | 22.6    | 22.3    | 23.3    | 28             | 28.2           | 28.3           | 28.7           | 19.5     | 16.2   | 25.9     | 26     |
| 2                     | 38   | 22       | 22.1    | 21.9    | 22.5    | 28             | 28.2           | 28.3           | 28.7           | 21.2     | 20.2   | 27.9     | 30.6   |
| 2                     | 39   | 21.8     | 21.9    | 21.2    | 22      | 27.5           | 27.5           | 27.4           | 27.3           | 22.2     | 22.5   | 30.2     | 36     |
| 2                     | 40   | 21.4     | 21.3    | 21      | 21      | 27             | 26.8           | 26.5           | 26             | 24.1     | 26.8   | 32.1     | 40.4   |
| 2                     | 41   | 21.3     | 21.2    | 20.3    | 20.7    | 27             | 26.8           | 26.5           | 26             | 25.7     | 30.5   | 33.2     | 43     |
| 2                     | 42   | 20.9     | 20.6    | 20.1    | 19.6    | 26.5           | 26.1           | 25.6           | 24.7           | 26.6     | 32.7   | 33.7     | 44.1   |
| 2                     | 43   | 20.8     | 20.5    | 19.4    | 19.4    | 26.5           | 26.1           | 25.6           | 24.7           | 26.9     | 33.4   | 33.6     | 43.8   |
| 2                     | 44   | 20.4     | 19.9    | 19.4    | 18.3    | 26.5           | 26.1           | 25.6           | 24.7           | 26.8     | 33.1   | 32.6     | 41.6   |
| 2                     | 45   | 20.4     | 19.9    | 19.4    | 18.3    | 26             | 25.4           | 24.7           | 23.3           | 26.4     | 32.1   | 31.2     | 38.3   |
| 2                     | 46   | 20.4     | 19.9    | 19.7    | 18.3    | 26             | 25.4           | 24.7           | 23.3           | 25.7     | 30.5   | 29.7     | 34.9   |
| 2                     | 47   | 20.6     | 20.2    | 20.5    | 18.8    | 26             | 25.4           | 24.7           | 23.3           | 24.9     | 28.7   | 28.4     | 31.9   |
| 2                     | 48   | 21       | 20.7    | 20.2    | 19.9    | 26             | 25.4           | 24.7           | 23.3           | 24.1     | 26.7   | 27.1     | 28.9   |
| 3                     | 49   | 21.5     | 20.9    | 22.2    | 18.8    | 26             | 25.4           | 24.9           | 23.6           | 23.3     | 23.3   | 25.9     | 25     |
| 3                     | 50   | 22.6     | 22.4    | 24.2    | 21.7    | 26             | 25.4           | 24.9           | 23.6           | 22.7     | 21.8   | 24.9     | 22.7   |
| 3                     | 51   | 23.7     | 23.9    | 26      | 24.7    | 27             | 26.8           | 26.7           | 26.3           | 22.1     | 20.6   | 23.9     | 20.5   |
| 3                     | 52   | 24.7     | 25.3    | 27.2    | 27.3    | 28.5           | 28.9           | 29.4           | 30.3           | 21.7     | 19.6   | 23.2     | 18.8   |
| 3                     | 53   | 25.4     | 26.3    | 27.9    | 29.2    | 30             | 31             | 32.1           | 34.3           | 21.3     | 18.8   | 22.4     | 17.1   |
| 3                     | 54   | 25.8     | 26.9    | 27.9    | 30.3    | 31             | 32.4           | 33.9           | 36.9           | 21       | 18     | 21.6     | 15.2   |
| 3                     | 55   | 25.8     | 26.9    | 27.2    | 30.3    | 31.5           | 33.1           | 34.8           | 38.2           | 20.7     | 17.3   | 20.9     | 13.5   |
| 3                     | 56   | 25.4     | 26.3    | 26.3    | 29.2    | 31.5           | 33.1           | 34.8           | 38.2           | 20.3     | 16.5   | 20.2     | 12.1   |
| 3                     | 57   | 24.9     | 25.6    | 25.6    | 27.9    | 30.5           | 31.7           | 33             | 35.6           | 19.9     | 15.6   | 19.9     | 11.2   |
| 3                     | 58   | 24.5     | 25.1    | 24.9    | 26.8    | 30             | 31             | 32.1           | 34.3           | 19.7     | 15     | 20.1     | 11.8   |

|   |     |      |      |      |      |      |      |      |      |      |      |      |      |
|---|-----|------|------|------|------|------|------|------|------|------|------|------|------|
| 3 | 59  | 24.1 | 24.5 | 24.3 | 25.7 | 29   | 29.6 | 30.3 | 31.6 | 19.7 | 15.1 | 21.3 | 14.5 |
| 3 | 60  | 23.8 | 24.1 | 24   | 24.9 | 28.5 | 28.9 | 29.4 | 30.3 | 20.1 | 16   | 23.4 | 19.4 |
| 3 | 61  | 23.6 | 23.8 | 23.4 | 24.4 | 28   | 28.2 | 28.5 | 28.9 | 21.4 | 19   | 26   | 25.3 |
| 3 | 62  | 23.3 | 23.4 | 22.7 | 23.6 | 27.5 | 27.5 | 27.6 | 27.6 | 23   | 22.7 | 28.7 | 31.6 |
| 3 | 63  | 22.9 | 22.8 | 22.5 | 22.5 | 27   | 26.8 | 26.7 | 26.3 | 24.9 | 26.9 | 31.2 | 37.2 |
| 3 | 64  | 22.8 | 22.7 | 21.8 | 22.3 | 26.5 | 26.1 | 25.8 | 24.9 | 26.4 | 30.3 | 32.9 | 41.2 |
| 3 | 65  | 22.4 | 22.1 | 21.5 | 21.2 | 26   | 25.4 | 24.9 | 23.6 | 27   | 31.8 | 33.9 | 43.5 |
| 3 | 66  | 22.2 | 21.8 | 20.7 | 20.7 | 25.5 | 24.7 | 24   | 22.3 | 27.2 | 32.3 | 34.3 | 44.4 |
| 3 | 67  | 21.8 | 21.3 | 19.8 | 19.6 | 25   | 24   | 23.1 | 21   | 27.1 | 32.1 | 34   | 43.8 |
| 3 | 68  | 21.3 | 20.6 | 18.9 | 18.3 | 25   | 24   | 23.1 | 21   | 26.7 | 31.1 | 32.9 | 41.2 |
| 3 | 69  | 20.8 | 19.9 | 18.4 | 17   | 24.5 | 23.3 | 22.2 | 19.6 | 26.2 | 29.9 | 31.2 | 37.2 |
| 3 | 70  | 20.5 | 19.5 | 18.2 | 16.2 | 24   | 22.6 | 21.3 | 18.3 | 25.9 | 29.3 | 29.5 | 33.3 |
| 3 | 71  | 20.4 | 19.3 | 18.6 | 15.9 | 24.5 | 23.3 | 22.2 | 19.6 | 25.5 | 28.3 | 27.9 | 29.6 |
| 3 | 72  | 20.6 | 19.6 | 20.8 | 16.4 | 25.5 | 24.7 | 24   | 22.3 | 24.8 | 26.8 | 26.4 | 26.3 |
| 4 | 73  | 21.4 | 21.1 | 22.5 | 20.2 | 27   | 26.1 | 25.1 | 23.1 | 24.2 | 25.9 | 25.1 | 25   |
| 4 | 74  | 22.3 | 22.4 | 24.3 | 22.6 | 29   | 28.9 | 28.7 | 28.4 | 23.8 | 24.9 | 23.8 | 22.1 |
| 4 | 75  | 23.3 | 23.8 | 26.4 | 25.3 | 30.5 | 31   | 31.4 | 32.4 | 23.1 | 23.3 | 22.7 | 19.7 |
| 4 | 76  | 24.5 | 25.5 | 28   | 28.5 | 32   | 33.1 | 34.1 | 36.4 | 22.3 | 21.4 | 21.7 | 17.3 |
| 4 | 77  | 25.4 | 26.7 | 29.5 | 30.9 | 33   | 34.5 | 35.9 | 39.1 | 21.5 | 19.7 | 20.8 | 15.2 |
| 4 | 78  | 26.2 | 27.8 | 30.4 | 33   | 33.5 | 35.2 | 36.8 | 40.4 | 21   | 18.4 | 20   | 13.3 |
| 4 | 79  | 26.7 | 28.5 | 28.9 | 34.3 | 33   | 34.5 | 35.9 | 39.1 | 20.5 | 17.3 | 19.2 | 11.6 |
| 4 | 80  | 25.9 | 27.4 | 27.1 | 32.2 | 32.5 | 33.8 | 35   | 37.8 | 20   | 16.2 | 18.6 | 10.2 |
| 4 | 81  | 24.9 | 26   | 25.5 | 29.6 | 32   | 33.1 | 34.1 | 36.4 | 19.5 | 15.1 | 18.2 | 9.3  |
| 4 | 82  | 24   | 24.8 | 24.4 | 27.2 | 31   | 31.7 | 32.3 | 33.8 | 19.4 | 14.8 | 18.7 | 10.4 |
| 4 | 83  | 23.4 | 23.9 | 23.4 | 25.6 | 30.5 | 31   | 31.4 | 32.4 | 19.4 | 14.8 | 20.1 | 13.6 |
| 4 | 84  | 22.8 | 23.1 | 22.5 | 24   | 30   | 30.3 | 30.5 | 31.1 | 19.9 | 15.9 | 21.9 | 17.6 |
| 4 | 85  | 22.3 | 22.4 | 21.4 | 22.6 | 29.5 | 29.6 | 29.6 | 29.8 | 21.4 | 19.4 | 24   | 22.5 |
| 4 | 86  | 21.7 | 21.5 | 20.5 | 21   | 29   | 28.9 | 28.7 | 28.4 | 23   | 23.1 | 26.3 | 27.8 |
| 4 | 87  | 21.2 | 20.8 | 19.8 | 19.7 | 28.5 | 28.2 | 27.8 | 27.1 | 24.8 | 27.2 | 28.6 | 33   |
| 4 | 88  | 20.8 | 20.3 | 18.9 | 18.6 | 28   | 27.5 | 26.9 | 25.8 | 26.4 | 30.9 | 30.5 | 37.5 |
| 4 | 89  | 20.3 | 19.6 | 18   | 17.3 | 27.5 | 26.8 | 26   | 24.5 | 26.8 | 31.8 | 31.9 | 40.8 |
| 4 | 90  | 19.8 | 18.9 | 17.1 | 16   | 27   | 26.1 | 25.1 | 23.1 | 25.2 | 28.2 | 32.7 | 42.5 |
| 4 | 91  | 19.3 | 18.2 | 16.5 | 14.7 | 27   | 26.1 | 25.1 | 23.1 | 26.1 | 30.3 | 32.7 | 42.6 |
| 4 | 92  | 19   | 17.8 | 16.2 | 13.9 | 26.5 | 25.4 | 24.2 | 21.8 | 26.2 | 30.5 | 32   | 40.9 |
| 4 | 93  | 18.8 | 17.5 | 15.3 | 13.3 | 26.5 | 25.4 | 24.2 | 21.8 | 25.3 | 28.4 | 30.6 | 37.8 |
| 4 | 94  | 18.3 | 16.8 | 15.6 | 12   | 26.5 | 25.4 | 24.2 | 21.8 | 24.6 | 26.7 | 29.1 | 34.2 |
| 4 | 95  | 18.5 | 17.1 | 17.4 | 12.5 | 26.5 | 25.4 | 24.2 | 21.8 | 23.7 | 24.8 | 27.5 | 30.6 |
| 4 | 96  | 19.5 | 18.5 | 19.1 | 15.2 | 27.5 | 26.8 | 26   | 24.5 | 22.9 | 23   | 26.1 | 27.3 |
| 5 | 97  | 20.8 | 19.9 | 21.8 | 17.2 | 29   | 29.4 | 29.7 | 30.5 | 22.1 | 22.1 | 24.8 | 25.9 |
| 5 | 98  | 22.3 | 22   | 23.9 | 21.2 | 30.5 | 31.5 | 32.4 | 34.5 | 21.4 | 20.7 | 23.7 | 23.3 |
| 5 | 99  | 23.5 | 23.7 | 26.6 | 24.4 | 31.5 | 32.9 | 34.2 | 37.1 | 21   | 19.6 | 22.7 | 21   |
| 5 | 100 | 25   | 25.8 | 29   | 28.4 | 31   | 32.2 | 33.3 | 35.8 | 20.5 | 18.4 | 21.8 | 19   |
| 5 | 101 | 26.3 | 27.6 | 30.8 | 31.9 | 30.5 | 31.5 | 32.4 | 34.5 | 20.1 | 17.5 | 21   | 17.2 |
| 5 | 102 | 27.3 | 29   | 31.3 | 34.5 | 30   | 30.8 | 31.5 | 33.1 | 19.7 | 16.6 | 20.4 | 15.7 |
| 5 | 103 | 27.6 | 29.5 | 30.4 | 35.3 | 30   | 30.8 | 31.5 | 33.1 | 19.4 | 15.9 | 19.8 | 14.4 |
| 5 | 104 | 27.1 | 28.8 | 28.4 | 34   | 30   | 30.8 | 31.5 | 33.1 | 19   | 15.2 | 19.3 | 13.3 |
| 5 | 105 | 26   | 27.2 | 26.8 | 31.1 | 29.5 | 30.1 | 30.6 | 31.8 | 18.7 | 14.5 | 19   | 12.7 |
| 5 | 106 | 25.1 | 26   | 25.4 | 28.7 | 29.5 | 30.1 | 30.6 | 31.8 | 18.5 | 14   | 19.4 | 13.6 |
| 5 | 107 | 24.3 | 24.8 | 24.5 | 26.5 | 29   | 29.4 | 29.7 | 30.5 | 18.5 | 13.8 | 20.1 | 15   |
| 5 | 108 | 23.8 | 24.1 | 23.4 | 25.2 | 28.5 | 28.7 | 28.8 | 29.2 | 18.9 | 14.9 | 21.6 | 18.4 |
| 5 | 109 | 23.2 | 23.3 | 22.5 | 23.6 | 28   | 28   | 27.9 | 27.8 | 20.1 | 17.6 | 23.8 | 23.6 |
| 5 | 110 | 22.7 | 22.6 | 21.6 | 22.3 | 27.5 | 27.3 | 27   | 26.5 | 21.6 | 21   | 25.7 | 28.1 |
| 5 | 111 | 22.2 | 21.9 | 20.7 | 20.9 | 27.5 | 27.3 | 27   | 26.5 | 22.4 | 22.9 | 28.3 | 34   |
| 5 | 112 | 21.7 | 21.2 | 20   | 19.6 | 27   | 26.6 | 26.1 | 25.2 | 23.5 | 25.4 | 29.5 | 36.7 |
| 5 | 113 | 21.3 | 20.6 | 19.1 | 18.6 | 26.5 | 25.9 | 25.2 | 23.8 | 24.8 | 28.3 | 29.3 | 36.3 |
| 5 | 114 | 20.8 | 19.9 | 18.2 | 17.2 | 26.5 | 25.9 | 25.2 | 23.8 | 25.9 | 31   | 28.7 | 35   |
| 5 | 115 | 20.3 | 19.2 | 18   | 15.9 | 26   | 25.2 | 24.3 | 22.5 | 26.5 | 32.4 | 27.9 | 33.1 |
| 5 | 116 | 20.2 | 19.1 | 17.3 | 15.6 | 25.5 | 24.5 | 23.4 | 21.2 | 26.5 | 32.2 | 27.1 | 31.2 |
| 5 | 117 | 19.8 | 18.5 | 17.1 | 14.6 | 25   | 23.8 | 22.5 | 19.8 | 26   | 31.2 | 26.2 | 29.2 |
| 5 | 118 | 19.7 | 18.4 | 17.3 | 14.3 | 25   | 23.8 | 22.5 | 19.8 | 25.3 | 29.6 | 25.5 | 27.5 |
| 5 | 119 | 19.8 | 18.5 | 17.8 | 14.6 | 25   | 23.8 | 22.5 | 19.8 | 24.5 | 27.6 | 24.8 | 25.9 |
| 5 | 120 | 20.1 | 19   | 19.7 | 15.4 | 26   | 25.2 | 24.3 | 22.5 | 23.6 | 25.6 | 24.1 | 24.3 |
| 6 | 121 | 20.3 | 20   | 20.3 | 19.2 | 27   | 26.7 | 26.5 | 25.9 | 22.8 | 24.1 | 23.4 | 26.2 |
| 6 | 122 | 20.6 | 20.4 | 21   | 19.9 | 28   | 28.1 | 28.3 | 28.6 | 22.1 | 22.4 | 22.7 | 24.6 |
| 6 | 123 | 21   | 21   | 21.7 | 21   | 29.5 | 30.2 | 31   | 32.5 | 21.4 | 21   | 22.1 | 23.1 |

|   |     |      |      |      |      |      |      |      |      |      |      |      |      |
|---|-----|------|------|------|------|------|------|------|------|------|------|------|------|
| 6 | 124 | 21.4 | 21.6 | 22.6 | 22.1 | 30.5 | 31.6 | 32.8 | 35.2 | 20.9 | 19.7 | 21.6 | 21.8 |
| 6 | 125 | 21.9 | 22.3 | 23.3 | 23.4 | 31.5 | 33   | 34.6 | 37.9 | 20.4 | 18.6 | 20.9 | 20.3 |
| 6 | 126 | 22.3 | 22.8 | 23.5 | 24.5 | 32   | 33.7 | 35.5 | 39.2 | 19.9 | 17.6 | 20.2 | 18.8 |
| 6 | 127 | 22.4 | 23   | 24.1 | 24.7 | 32   | 33.7 | 35.5 | 39.2 | 19.6 | 16.7 | 19.6 | 17.4 |
| 6 | 128 | 22.7 | 23.4 | 24.2 | 25.5 | 32   | 33.7 | 35.5 | 39.2 | 19.3 | 16.1 | 19.2 | 16.4 |
| 6 | 129 | 22.8 | 23.5 | 23.9 | 25.8 | 31   | 32.3 | 33.7 | 36.5 | 19.1 | 15.6 | 19.1 | 16.2 |
| 6 | 130 | 22.6 | 23.2 | 23.3 | 25.3 | 30   | 30.9 | 31.9 | 33.9 | 19   | 15.3 | 19.5 | 17.1 |
| 6 | 131 | 22.3 | 22.8 | 22.4 | 24.5 | 29   | 29.5 | 30.1 | 31.2 | 19.1 | 15.6 | 20.2 | 18.8 |
| 6 | 132 | 21.8 | 22.1 | 21.7 | 23.1 | 28.5 | 28.8 | 29.2 | 29.9 | 19.7 | 16.9 | 20.9 | 20.3 |
| 6 | 133 | 21.4 | 21.6 | 21.4 | 22.1 | 27.5 | 27.4 | 27.4 | 27.2 | 20.7 | 19.4 | 21.4 | 21.5 |
| 6 | 134 | 21.2 | 21.3 | 20.8 | 21.5 | 27   | 26.7 | 26.5 | 25.9 | 21.7 | 21.6 | 22.2 | 23.3 |
| 6 | 135 | 20.9 | 20.9 | 19.9 | 20.7 | 26.5 | 26   | 25.6 | 24.6 | 22.3 | 23.1 | 22.8 | 24.7 |
| 6 | 136 | 20.4 | 20.2 | 19.6 | 19.4 | 26   | 25.3 | 24.7 | 23.2 | 22.8 | 24   | 22.9 | 24.9 |
| 6 | 137 | 20.2 | 19.9 | 19   | 18.9 | 25.5 | 24.6 | 23.8 | 21.9 | 23.5 | 25.8 | 22.6 | 24.1 |
| 6 | 138 | 19.9 | 19.5 | 18.8 | 18.1 | 25   | 23.9 | 22.9 | 20.6 | 24.5 | 28.1 | 22.4 | 23.7 |
| 6 | 139 | 19.8 | 19.3 | 18.3 | 17.8 | 24.5 | 23.2 | 22   | 19.2 | 25.3 | 29.9 | 22.2 | 23.3 |
| 6 | 140 | 19.5 | 18.9 | 17.9 | 17   | 24.5 | 23.2 | 22   | 19.2 | 24.8 | 28.9 | 21.9 | 22.7 |
| 6 | 141 | 19.3 | 18.6 | 17.8 | 16.5 | 24   | 22.5 | 21.1 | 17.9 | 24.4 | 27.9 | 21.7 | 22.3 |
| 6 | 142 | 19.2 | 18.5 | 18.5 | 16.2 | 23.5 | 21.8 | 20.2 | 16.6 | 23.8 | 26.5 | 21.4 | 21.4 |
| 6 | 143 | 19.6 | 19   | 19.7 | 17.3 | 24   | 22.5 | 21.1 | 17.9 | 23.1 | 24.9 | 20.9 | 20.3 |
| 6 | 144 | 20.3 | 20   | 19.5 | 19.2 | 25   | 23.9 | 22.9 | 20.6 | 22.5 | 23.4 | 20.3 | 19   |
| 7 | 145 | 21.3 | 20.4 | 22   | 17.5 | 26.5 | 26   | 25.5 | 24.5 | 22   | 19.7 | 19.7 | 21.4 |
| 7 | 146 | 22.7 | 22.3 | 24   | 21.2 | 28   | 28.1 | 28.2 | 28.5 | 21.5 | 18.5 | 19.3 | 20.6 |
| 7 | 147 | 23.8 | 23.9 | 26.1 | 24.1 | 29.5 | 30.2 | 30.9 | 32.5 | 21.1 | 17.6 | 18.9 | 19.7 |
| 7 | 148 | 25   | 25.6 | 28.5 | 27.3 | 30.5 | 31.6 | 32.7 | 35.1 | 20.7 | 16.8 | 18.6 | 19   |
| 7 | 149 | 26.3 | 27.4 | 29.2 | 30.8 | 31.5 | 33   | 34.5 | 37.8 | 20.4 | 16.1 | 18.4 | 18.4 |
| 7 | 150 | 26.7 | 27.9 | 29.4 | 31.8 | 32.5 | 34.4 | 36.3 | 40.5 | 20.2 | 15.7 | 18.2 | 18.1 |
| 7 | 151 | 26.8 | 28.1 | 29.7 | 32.1 | 32   | 33.7 | 35.4 | 39.1 | 20   | 15.2 | 18   | 17.7 |
| 7 | 152 | 27   | 28.4 | 27.9 | 32.6 | 32   | 33.7 | 35.4 | 39.1 | 19.8 | 14.8 | 17.9 | 17.4 |
| 7 | 153 | 26   | 27   | 27   | 30   | 30.5 | 31.6 | 32.7 | 35.1 | 19.7 | 14.5 | 17.9 | 17.2 |
| 7 | 154 | 25.5 | 26.3 | 25.8 | 28.6 | 30   | 30.9 | 31.8 | 33.8 | 19.5 | 14   | 17.9 | 17.2 |
| 7 | 155 | 24.8 | 25.3 | 24.9 | 26.8 | 29   | 29.5 | 30   | 31.1 | 19.4 | 13.7 | 18   | 17.5 |
| 7 | 156 | 24.3 | 24.6 | 24.1 | 25.4 | 28.5 | 28.8 | 29.1 | 29.8 | 19.9 | 15   | 18   | 17.5 |
| 7 | 157 | 23.9 | 24   | 23.2 | 24.4 | 27.5 | 27.4 | 27.3 | 27.2 | 21.7 | 19.1 | 18.1 | 17.8 |
| 7 | 158 | 23.4 | 23.3 | 22.3 | 23   | 27   | 26.7 | 26.4 | 25.8 | 23.6 | 23.4 | 18.2 | 18.1 |
| 7 | 159 | 22.9 | 22.6 | 22.2 | 21.7 | 26.5 | 26   | 25.5 | 24.5 | 25.3 | 27.3 | 18.3 | 18.3 |
| 7 | 160 | 22.8 | 22.5 | 21.4 | 21.5 | 26   | 25.3 | 24.6 | 23.2 | 26.8 | 30.9 | 18.3 | 18.3 |
| 7 | 161 | 22.4 | 21.9 | 20.9 | 20.4 | 25.5 | 24.6 | 23.7 | 21.8 | 28.2 | 34.1 | 18.6 | 19   |
| 7 | 162 | 22.1 | 21.5 | 20.4 | 19.6 | 25.5 | 24.6 | 23.7 | 21.8 | 29.1 | 36.1 | 18.8 | 19.4 |
| 7 | 163 | 21.8 | 21.1 | 19.6 | 18.8 | 25   | 23.9 | 22.8 | 20.5 | 29.5 | 37   | 18.8 | 19.4 |
| 7 | 164 | 21.4 | 20.5 | 19.5 | 17.7 | 24.5 | 23.2 | 21.9 | 19.2 | 29.6 | 37.2 | 18.4 | 18.5 |
| 7 | 165 | 21.3 | 20.4 | 18.9 | 17.5 | 24   | 22.5 | 21   | 17.8 | 29.2 | 36.2 | 18.2 | 18   |
| 7 | 166 | 21   | 20   | 19.5 | 16.7 | 24   | 22.5 | 21   | 17.8 | 28.3 | 34.2 | 18   | 17.5 |
| 7 | 167 | 21.3 | 20.4 | 21.1 | 17.5 | 24   | 22.5 | 21   | 17.8 | 27.2 | 31.6 | 17.8 | 17.1 |
| 7 | 168 | 22.2 | 21.6 | 22.4 | 19.9 | 25   | 23.9 | 22.8 | 20.5 | 26   | 29   | 17.7 | 16.8 |
| 8 | 169 | 23.3 | 22.9 | 24.2 | 21.5 | 26.5 | 25.7 | 24.9 | 23.1 | 24.4 | 24.4 | 17.5 | 15.2 |
| 8 | 170 | 24.3 | 24.3 | 26.2 | 24.2 | 28   | 27.8 | 27.6 | 27.1 | 23.4 | 22.2 | 17.5 | 15.1 |
| 8 | 171 | 25.4 | 25.8 | 28   | 27.1 | 29   | 29.2 | 29.4 | 29.8 | 22.7 | 20.4 | 17.4 | 15   |
| 8 | 172 | 26.4 | 27.2 | 29.8 | 29.8 | 30.5 | 31.3 | 32.1 | 33.8 | 22   | 18.9 | 17.4 | 14.8 |
| 8 | 173 | 27.4 | 28.6 | 31.1 | 32.4 | 31.5 | 32.7 | 33.9 | 36.4 | 21.4 | 17.6 | 17.4 | 14.8 |
| 8 | 174 | 28.1 | 29.6 | 31.4 | 34.3 | 32.5 | 34.1 | 35.7 | 39.1 | 20.9 | 16.4 | 17.4 | 14.8 |
| 8 | 175 | 28.3 | 29.9 | 30.9 | 34.8 | 32.5 | 34.1 | 35.7 | 39.1 | 20.4 | 15.3 | 17.3 | 14.7 |
| 8 | 176 | 28   | 29.4 | 29.1 | 34   | 32   | 33.4 | 34.8 | 37.8 | 20   | 14.3 | 17.3 | 14.7 |
| 8 | 177 | 27   | 28   | 27.5 | 31.4 | 31   | 32   | 33   | 35.1 | 19.5 | 13.2 | 17.6 | 15.4 |
| 8 | 178 | 26.1 | 26.8 | 26.6 | 29   | 30.5 | 31.3 | 32.1 | 33.8 | 19.2 | 12.6 | 18   | 16.4 |
| 8 | 179 | 25.6 | 26.1 | 25.3 | 27.6 | 30   | 30.6 | 31.2 | 32.5 | 19.1 | 12.3 | 18.5 | 17.4 |
| 8 | 180 | 24.9 | 25.1 | 24.4 | 25.8 | 29.5 | 29.9 | 30.3 | 31.1 | 19.7 | 13.7 | 19   | 18.5 |
| 8 | 181 | 24.4 | 24.4 | 23.5 | 24.4 | 29   | 29.2 | 29.4 | 29.8 | 21.6 | 18   | 19.3 | 19.3 |
| 8 | 182 | 23.9 | 23.7 | 22.6 | 23.1 | 28.5 | 28.5 | 28.5 | 28.5 | 23.6 | 22.6 | 19.8 | 20.4 |
| 8 | 183 | 23.4 | 23   | 22.3 | 21.8 | 28   | 27.8 | 27.6 | 27.1 | 25.5 | 27   | 21.1 | 23.4 |
| 8 | 184 | 23.2 | 22.7 | 21.5 | 21.2 | 27.5 | 27.1 | 26.7 | 25.8 | 27.4 | 31.2 | 21.6 | 24.4 |
| 8 | 185 | 22.8 | 22.2 | 20.8 | 20.2 | 27   | 26.4 | 25.8 | 24.5 | 28.8 | 34.5 | 21.9 | 25.3 |
| 8 | 186 | 22.4 | 21.6 | 20.5 | 19.1 | 26.5 | 25.7 | 24.9 | 23.1 | 29.8 | 36.8 | 22   | 25.5 |
| 8 | 187 | 22.2 | 21.3 | 19.7 | 18.6 | 26   | 25   | 24   | 21.8 | 30.3 | 38   | 22.1 | 25.7 |
| 8 | 188 | 21.8 | 20.8 | 19   | 17.5 | 26   | 25   | 24   | 21.8 | 30.3 | 38   | 21.6 | 24.4 |

|    |     |      |      |      |      |      |      |      |      |      |      |      |      |
|----|-----|------|------|------|------|------|------|------|------|------|------|------|------|
| 8  | 189 | 21.4 | 20.2 | 18.7 | 16.5 | 25.5 | 24.3 | 23.1 | 20.5 | 29.9 | 37   | 21.1 | 23.4 |
| 8  | 190 | 21.2 | 19.9 | 19   | 15.9 | 25   | 23.6 | 22.2 | 19.2 | 29.1 | 35.2 | 20.8 | 22.7 |
| 8  | 191 | 21.4 | 20.2 | 20.5 | 16.5 | 25.5 | 24.3 | 23.1 | 20.5 | 28.2 | 33.1 | 20.3 | 21.6 |
| 8  | 192 | 22.2 | 21.3 | 22.1 | 18.6 | 26.5 | 25.7 | 24.9 | 23.1 | 27.3 | 31   | 19.9 | 20.7 |
| 9  | 193 | 23.3 | 22.7 | 23.9 | 20.9 | 27.5 | 26.7 | 25.9 | 24.1 | 26.4 | 28.6 | 19.6 | 18.6 |
| 9  | 194 | 24.3 | 24.1 | 26.6 | 23.5 | 29   | 28.8 | 28.6 | 28.1 | 25.7 | 27   | 19.4 | 18   |
| 9  | 195 | 25.8 | 26.2 | 28.4 | 27.5 | 30.5 | 30.9 | 31.3 | 32.1 | 25.1 | 25.5 | 19.1 | 17.4 |
| 9  | 196 | 26.8 | 27.6 | 30.2 | 30.2 | 32   | 33   | 34   | 36.1 | 24.5 | 24.3 | 18.9 | 17   |
| 9  | 197 | 27.8 | 29   | 31.7 | 32.9 | 33   | 34.4 | 35.8 | 38.7 | 18.7 | 10.8 | 18.7 | 16.6 |
| 9  | 198 | 28.6 | 30.1 | 32   | 35   | 33.5 | 35.1 | 36.7 | 40.1 | 20   | 13.8 | 18.5 | 16.1 |
| 9  | 199 | 28.8 | 30.4 | 31.1 | 35.5 | 33.5 | 35.1 | 36.7 | 40.1 | 20.1 | 14   | 18.4 | 15.9 |
| 9  | 200 | 28.3 | 29.7 | 29.5 | 34.2 | 33   | 34.4 | 35.8 | 38.7 | 20   | 13.9 | 18.3 | 15.6 |
| 9  | 201 | 27.4 | 28.5 | 28.1 | 31.8 | 32.5 | 33.7 | 34.9 | 37.4 | 20   | 13.8 | 18.5 | 16   |
| 9  | 202 | 26.6 | 27.3 | 27   | 29.7 | 31.5 | 32.3 | 33.1 | 34.8 | 19.9 | 13.7 | 18.5 | 16.1 |
| 9  | 203 | 26   | 26.5 | 25.9 | 28.1 | 31   | 31.6 | 32.2 | 33.4 | 20   | 13.9 | 18.6 | 16.3 |
| 9  | 204 | 25.4 | 25.7 | 25   | 26.5 | 30.5 | 30.9 | 31.3 | 32.1 | 20.8 | 15.7 | 18.9 | 17   |
| 9  | 205 | 24.9 | 25   | 24.1 | 25.1 | 30   | 30.2 | 30.4 | 30.8 | 22.4 | 19.5 | 20.2 | 20   |
| 9  | 206 | 24.4 | 24.3 | 23.2 | 23.8 | 29.5 | 29.5 | 29.5 | 29.4 | 24.5 | 24.2 | 21.8 | 23.6 |
| 9  | 207 | 23.9 | 23.6 | 22.3 | 22.5 | 29   | 28.8 | 28.6 | 28.1 | 26.5 | 28.7 | 22.3 | 24.8 |
| 9  | 208 | 23.4 | 22.9 | 22   | 21.2 | 28.5 | 28.1 | 27.7 | 26.8 | 28.2 | 32.7 | 23   | 26.4 |
| 9  | 209 | 23.2 | 22.6 | 21.2 | 20.6 | 28   | 27.4 | 26.8 | 25.4 | 29.4 | 35.6 | 23.3 | 27.1 |
| 9  | 210 | 22.8 | 22   | 20.5 | 19.6 | 27.5 | 26.7 | 25.9 | 24.1 | 30.2 | 37.3 | 23.6 | 27.6 |
| 9  | 211 | 22.4 | 21.5 | 20.2 | 18.5 | 27   | 26   | 25   | 22.8 | 30.4 | 37.8 | 23.2 | 26.8 |
| 9  | 212 | 22.2 | 21.2 | 19.4 | 18   | 26.5 | 25.3 | 24.1 | 21.5 | 30   | 36.9 | 22.7 | 25.8 |
| 9  | 213 | 21.8 | 20.6 | 19.3 | 16.9 | 26.5 | 25.3 | 24.1 | 21.5 | 29.3 | 35.3 | 22.1 | 24.2 |
| 9  | 214 | 21.7 | 20.5 | 19.4 | 16.6 | 26   | 24.6 | 23.2 | 20.1 | 28.4 | 33.3 | 21.3 | 22.5 |
| 9  | 215 | 21.8 | 20.6 | 20.7 | 16.9 | 26   | 24.6 | 23.2 | 20.1 | 27.6 | 31.4 | 20.6 | 20.9 |
| 9  | 216 | 22.5 | 21.6 | 22.4 | 18.8 | 27   | 26   | 25   | 22.8 | 26.3 | 28.3 | 20   | 19.4 |
| 10 | 217 | 23.8 | 23.1 | 24.9 | 20.8 | 28.5 | 27.8 | 27.1 | 25.5 | 23.5 | 22.6 | 19.4 | 20.7 |
| 10 | 218 | 25.2 | 25   | 26.9 | 24.5 | 30   | 29.9 | 29.8 | 29.5 | 21.4 | 17.8 | 18.9 | 19.6 |
| 10 | 219 | 26.3 | 26.6 | 29.6 | 27.4 | 31   | 31.3 | 31.6 | 32.1 | 21.5 | 17.9 | 18.5 | 18.7 |
| 10 | 220 | 27.8 | 28.7 | 31.4 | 31.4 | 32.5 | 33.4 | 34.3 | 36.1 | 21.3 | 17.5 | 18.3 | 18.1 |
| 10 | 221 | 28.8 | 30.1 | 32.3 | 34.1 | 34   | 35.5 | 37   | 40.1 | 21   | 16.8 | 18   | 17.4 |
| 10 | 222 | 29.3 | 30.8 | 33   | 35.4 | 34.5 | 36.2 | 37.9 | 41.5 | 20.7 | 16.2 | 17.7 | 16.7 |
| 10 | 223 | 29.7 | 31.3 | 32.1 | 36.5 | 34.5 | 36.2 | 37.9 | 41.5 | 20.4 | 15.5 | 17.4 | 16   |
| 10 | 224 | 29.2 | 30.6 | 30.6 | 35.2 | 34   | 35.5 | 37   | 40.1 | 20.2 | 14.9 | 17.2 | 15.5 |
| 10 | 225 | 28.4 | 29.5 | 29   | 33   | 33.5 | 34.8 | 36.1 | 38.8 | 19.8 | 14.2 | 17.1 | 15.4 |
| 10 | 226 | 27.5 | 28.3 | 27.9 | 30.6 | 32.5 | 33.4 | 34.3 | 36.1 | 19.7 | 13.9 | 17   | 15.2 |
| 10 | 227 | 26.9 | 27.4 | 26.9 | 29   | 32   | 32.7 | 33.4 | 34.8 | 19.7 | 13.8 | 17   | 15.2 |
| 10 | 228 | 26.3 | 26.6 | 26   | 27.4 | 31.5 | 32   | 32.5 | 33.5 | 20.2 | 15   | 17.4 | 16   |
| 10 | 229 | 25.8 | 25.9 | 25.1 | 26.1 | 30.5 | 30.6 | 30.7 | 30.8 | 21.9 | 18.9 | 17.5 | 16.4 |
| 10 | 230 | 25.3 | 25.2 | 24.3 | 24.8 | 30   | 29.9 | 29.8 | 29.5 | 23.8 | 23.2 | 17.9 | 17.1 |
| 10 | 231 | 24.9 | 24.6 | 23.4 | 23.7 | 30   | 29.9 | 29.8 | 29.5 | 25.7 | 27.6 | 18.6 | 18.8 |
| 10 | 232 | 24.4 | 23.9 | 22.5 | 22.4 | 29   | 28.5 | 28   | 26.8 | 27.5 | 31.7 | 19.5 | 20.9 |
| 10 | 233 | 23.9 | 23.2 | 22.2 | 21.1 | 28.5 | 27.8 | 27.1 | 25.5 | 28.8 | 34.8 | 20.1 | 22.1 |
| 10 | 234 | 23.7 | 22.9 | 21.5 | 20.5 | 28   | 27.1 | 26.2 | 24.2 | 29.7 | 36.9 | 19.9 | 21.9 |
| 10 | 235 | 23.3 | 22.4 | 20.7 | 19.5 | 28   | 27.1 | 26.2 | 24.2 | 30.3 | 38.2 | 19.8 | 21.6 |
| 10 | 236 | 22.9 | 21.8 | 20.4 | 18.4 | 27.5 | 26.4 | 25.3 | 22.8 | 30.1 | 37.9 | 19.6 | 21.1 |
| 10 | 237 | 22.7 | 21.5 | 19.8 | 17.9 | 27   | 25.7 | 24.4 | 21.5 | 29.6 | 36.6 | 19.4 | 20.7 |
| 10 | 238 | 22.4 | 21.1 | 20.6 | 17.1 | 26.5 | 25   | 23.5 | 20.2 | 28.8 | 34.7 | 19.1 | 20   |
| 10 | 239 | 22.8 | 21.7 | 21.5 | 18.1 | 26.5 | 25   | 23.5 | 20.2 | 27.9 | 32.8 | 18.7 | 19.1 |
| 10 | 240 | 23.3 | 22.4 | 22.6 | 19.5 | 27.5 | 26.4 | 25.3 | 22.8 | 27   | 30.7 | 18.4 | 18.3 |
| 11 | 241 | 24.3 | 23.5 | 25   | 20.8 | 28.5 | 28   | 27.5 | 26.4 | 26.2 | 26.2 | 18   | 13.6 |
| 11 | 242 | 25.6 | 25.3 | 27.3 | 24.3 | 30   | 30.1 | 30.2 | 30.4 | 25.4 | 24.5 | 17.8 | 13.1 |
| 11 | 243 | 26.9 | 27.1 | 29.8 | 27.7 | 31.5 | 32.2 | 32.9 | 34.4 | 24.8 | 23.1 | 17.5 | 12.5 |
| 11 | 244 | 28.3 | 29.1 | 30.9 | 31.4 | 32.5 | 33.6 | 34.7 | 37.1 | 24.3 | 21.9 | 17.4 | 12.1 |
| 11 | 245 | 28.9 | 29.9 | 32.2 | 33   | 33.5 | 35   | 36.5 | 39.7 | 23.8 | 20.7 | 17.2 | 11.6 |
| 11 | 246 | 29.6 | 30.9 | 32.9 | 34.9 | 34   | 35.7 | 37.4 | 41.1 | 23.3 | 19.7 | 17   | 11.2 |
| 11 | 247 | 30   | 31.4 | 32.2 | 36   | 34   | 35.7 | 37.4 | 41.1 | 22.9 | 18.8 | 16.9 | 10.9 |
| 11 | 248 | 29.6 | 30.9 | 30.9 | 34.9 | 33.5 | 35   | 36.5 | 39.7 | 22.5 | 17.8 | 16.7 | 10.6 |
| 11 | 249 | 28.9 | 29.9 | 30   | 33   | 32.5 | 33.6 | 34.7 | 37.1 | 22.2 | 17   | 16.8 | 10.8 |
| 11 | 250 | 28.4 | 29.2 | 28.9 | 31.7 | 32   | 32.9 | 33.8 | 35.7 | 21.9 | 16.5 | 17   | 11.2 |
| 11 | 251 | 27.8 | 28.4 | 28   | 30.1 | 31.5 | 32.2 | 32.9 | 34.4 | 22   | 16.6 | 17.4 | 12.2 |
| 11 | 252 | 27.3 | 27.7 | 27.1 | 28.8 | 30.5 | 30.8 | 31.1 | 31.7 | 22.6 | 18.1 | 18.3 | 14.2 |
| 11 | 253 | 26.8 | 27   | 26.2 | 27.4 | 30   | 30.1 | 30.2 | 30.4 | 24.4 | 22.2 | 21   | 20.4 |

|    |     |      |      |      |      |      |      |      |      |      |      |      |      |
|----|-----|------|------|------|------|------|------|------|------|------|------|------|------|
| 11 | 254 | 26.3 | 26.3 | 25.3 | 26.1 | 29   | 28.7 | 28.4 | 27.8 | 26.5 | 26.9 | 23.7 | 26.6 |
| 11 | 255 | 25.8 | 25.6 | 24.4 | 24.8 | 28.5 | 28   | 27.5 | 26.4 | 28.4 | 31.5 | 25.9 | 31.8 |
| 11 | 256 | 25.3 | 24.9 | 23.7 | 23.5 | 28   | 27.3 | 26.6 | 25.1 | 30   | 35   | 27.9 | 36.4 |
| 11 | 257 | 24.9 | 24.3 | 23.3 | 22.4 | 27.5 | 26.6 | 25.7 | 23.8 | 30.8 | 36.9 | 28.7 | 38.2 |
| 11 | 258 | 24.7 | 24   | 22.8 | 21.9 | 27.5 | 26.6 | 25.7 | 23.8 | 30.1 | 35.3 | 28.8 | 38.4 |
| 11 | 259 | 24.4 | 23.6 | 22.4 | 21.1 | 27   | 25.9 | 24.8 | 22.4 | 29.6 | 34.2 | 28.7 | 38.2 |
| 11 | 260 | 24.2 | 23.3 | 21.9 | 20.5 | 26.5 | 25.2 | 23.9 | 21.1 | 29.9 | 34.8 | 27.4 | 35.1 |
| 11 | 261 | 23.9 | 22.9 | 21.7 | 19.7 | 26.5 | 25.2 | 23.9 | 21.1 | 29.6 | 34.2 | 25.8 | 31.5 |
| 11 | 262 | 23.8 | 22.8 | 21.7 | 19.5 | 26   | 24.5 | 23   | 19.8 | 29.1 | 32.9 | 24.2 | 27.9 |
| 11 | 263 | 23.8 | 22.8 | 22.8 | 19.5 | 26.5 | 25.2 | 23.9 | 21.1 | 28.5 | 31.5 | 22.9 | 24.7 |
| 11 | 264 | 24.4 | 23.6 | 23.8 | 21.1 | 27   | 25.9 | 24.8 | 22.4 | 27.7 | 29.8 | 21.6 | 21.7 |
| 12 | 265 | 25.3 | 24.6 | 26.1 | 22.2 | 28   | 27.7 | 27.3 | 26.6 | 27.1 | 29   | 20.5 | 17.3 |
| 12 | 266 | 26.6 | 26.4 | 28.3 | 25.6 | 29.5 | 29.8 | 30   | 30.6 | 26.4 | 27.4 | 19.5 | 15   |
| 12 | 267 | 27.8 | 28.1 | 30.6 | 28.8 | 30.5 | 31.2 | 31.8 | 33.2 | 25.9 | 26.2 | 18.5 | 12.8 |
| 12 | 268 | 29.1 | 29.9 | 32.8 | 32.3 | 32   | 33.3 | 34.5 | 37.2 | 25.4 | 25.1 | 17.7 | 11   |
| 12 | 269 | 30.3 | 31.6 | 33.7 | 35.5 | 33   | 34.7 | 36.3 | 39.9 | 25   | 24.1 | 17   | 9.2  |
| 12 | 270 | 30.8 | 32.3 | 34.4 | 36.8 | 33   | 34.7 | 36.3 | 39.9 | 24.5 | 23   | 16.4 | 7.8  |
| 12 | 271 | 31.2 | 32.8 | 33.3 | 37.9 | 33   | 34.7 | 36.3 | 39.9 | 24.1 | 22   | 15.7 | 6.3  |
| 12 | 272 | 30.6 | 32   | 32.1 | 36.3 | 32.5 | 34   | 35.4 | 38.6 | 23.7 | 21.1 | 15.2 | 5.2  |
| 12 | 273 | 29.9 | 31   | 31   | 34.4 | 31.5 | 32.6 | 33.6 | 35.9 | 23.3 | 20.4 | 15.2 | 5.2  |
| 12 | 274 | 29.3 | 30.2 | 29.7 | 32.8 | 31   | 31.9 | 32.7 | 34.6 | 23.1 | 19.8 | 16.2 | 7.4  |
| 12 | 275 | 28.6 | 29.2 | 28.8 | 31   | 30   | 30.5 | 30.9 | 31.9 | 22.9 | 19.5 | 18.3 | 12.3 |
| 12 | 276 | 28.1 | 28.5 | 27.6 | 29.6 | 29.5 | 29.8 | 30   | 30.6 | 23.3 | 20.3 | 20.8 | 18   |
| 12 | 277 | 27.4 | 27.5 | 26.7 | 27.8 | 29   | 29.1 | 29.1 | 29.2 | 24.1 | 22   | 23.7 | 24.8 |
| 12 | 278 | 26.9 | 26.8 | 25.8 | 26.4 | 28.5 | 28.4 | 28.2 | 27.9 | 25.3 | 24.9 | 26.7 | 31.5 |
| 12 | 279 | 26.4 | 26.1 | 24.9 | 25.1 | 28   | 27.7 | 27.3 | 26.6 | 26.7 | 28.2 | 29.3 | 37.6 |
| 12 | 280 | 25.9 | 25.4 | 24.2 | 23.8 | 27.5 | 27   | 26.4 | 25.3 | 28.6 | 32.4 | 31.2 | 41.9 |
| 12 | 281 | 25.5 | 24.8 | 23.6 | 22.7 | 27   | 26.3 | 25.5 | 23.9 | 30   | 35.8 | 31.5 | 42.6 |
| 12 | 282 | 25.2 | 24.4 | 23.1 | 21.9 | 26.5 | 25.6 | 24.6 | 22.6 | 30.8 | 37.6 | 31.4 | 42.3 |
| 12 | 283 | 24.9 | 24   | 22.4 | 21.1 | 26   | 24.9 | 23.7 | 21.3 | 31.3 | 38.7 | 30.6 | 40.4 |
| 12 | 284 | 24.5 | 23.4 | 22.2 | 20.1 | 25.5 | 24.2 | 22.8 | 19.9 | 31.5 | 39.2 | 29.5 | 38   |
| 12 | 285 | 24.4 | 23.3 | 22   | 19.8 | 25   | 23.5 | 21.9 | 18.6 | 22.1 | 17.5 | 28.3 | 35.3 |
| 12 | 286 | 24.3 | 23.2 | 22   | 19.5 | 25   | 23.5 | 21.9 | 18.6 | 23.3 | 20.3 | 27.1 | 32.4 |
| 12 | 287 | 24.3 | 23.2 | 23.1 | 19.5 | 25   | 23.5 | 21.9 | 18.6 | 23.2 | 20.2 | 25.8 | 29.5 |
| 12 | 288 | 24.9 | 24   | 24.7 | 21.1 | 26   | 24.9 | 23.7 | 21.3 | 23   | 19.7 | 24.8 | 27.2 |
| 13 | 289 | 25.8 | 25.3 | 26.5 | 23.5 | 27.5 | 26.7 | 25.9 | 24.1 | 22.6 | 22   | 23.9 | 26.3 |
| 13 | 290 | 26.8 | 26.7 | 29   | 26.2 | 29   | 28.8 | 28.6 | 28.1 | 22.2 | 21   | 23.2 | 24.7 |
| 13 | 291 | 28.2 | 28.6 | 31   | 29.9 | 30.5 | 30.9 | 31.3 | 32.1 | 21.8 | 20.1 | 22.6 | 23.3 |
| 13 | 292 | 29.3 | 30.2 | 32.4 | 32.8 | 32   | 33   | 34   | 36   | 21.4 | 19.2 | 22.1 | 22.1 |
| 13 | 293 | 30.1 | 31.3 | 33.5 | 35   | 32.5 | 33.7 | 34.9 | 37.4 | 21.1 | 18.5 | 21.6 | 21   |
| 13 | 294 | 30.7 | 32.1 | 33.7 | 36.6 | 33   | 34.4 | 35.8 | 38.7 | 20.7 | 17.7 | 21.1 | 19.7 |
| 13 | 295 | 30.8 | 32.3 | 32.8 | 36.8 | 33.5 | 35.1 | 36.7 | 40   | 20.4 | 16.9 | 20.6 | 18.5 |
| 13 | 296 | 30.3 | 31.6 | 31.4 | 35.5 | 33   | 34.4 | 35.8 | 38.7 | 20.1 | 16.1 | 20.2 | 17.7 |
| 13 | 297 | 29.5 | 30.4 | 30.5 | 33.4 | 32.5 | 33.7 | 34.9 | 37.4 | 19.8 | 15.4 | 20.1 | 17.5 |
| 13 | 298 | 29   | 29.7 | 29.2 | 32   | 32   | 33   | 34   | 36   | 19.6 | 15   | 20.4 | 18.1 |
| 13 | 299 | 28.3 | 28.8 | 28.3 | 30.2 | 31.5 | 32.3 | 33.1 | 34.7 | 19.5 | 14.8 | 20.6 | 18.7 |
| 13 | 300 | 27.8 | 28.1 | 27.4 | 28.8 | 30.5 | 30.9 | 31.3 | 32.1 | 20.1 | 16.1 | 21.1 | 19.8 |
| 13 | 301 | 27.3 | 27.4 | 26.5 | 27.5 | 30   | 30.2 | 30.4 | 30.7 | 21.7 | 20   | 22.7 | 23.4 |
| 13 | 302 | 26.8 | 26.7 | 25.8 | 26.2 | 29.5 | 29.5 | 29.5 | 29.4 | 23.5 | 24.1 | 24.1 | 26.6 |
| 13 | 303 | 26.4 | 26.1 | 24.9 | 25.1 | 28.5 | 28.1 | 27.7 | 26.7 | 25.1 | 27.7 | 23   | 24.1 |
| 13 | 304 | 25.9 | 25.4 | 24.7 | 23.8 | 28   | 27.4 | 26.8 | 25.4 | 26.2 | 30.2 | 22.4 | 22.7 |
| 13 | 305 | 25.8 | 25.3 | 24   | 23.5 | 28   | 27.4 | 26.8 | 25.4 | 27.2 | 32.4 | 23.6 | 25.6 |
| 13 | 306 | 25.4 | 24.7 | 23.3 | 22.5 | 27.5 | 26.7 | 25.9 | 24.1 | 27.6 | 33.4 | 24.8 | 28.3 |
| 13 | 307 | 25   | 24.1 | 23.1 | 21.4 | 27   | 26   | 25   | 22.7 | 27   | 32.1 | 24.7 | 28   |
| 13 | 308 | 24.9 | 24   | 22.7 | 21.1 | 27   | 26   | 25   | 22.7 | 26.8 | 31.6 | 23.6 | 25.6 |
| 13 | 309 | 24.7 | 23.7 | 22.2 | 20.6 | 26.5 | 25.3 | 24.1 | 21.4 | 26.3 | 30.4 | 22.4 | 22.7 |
| 13 | 310 | 24.4 | 23.3 | 22.2 | 19.8 | 26.5 | 25.3 | 24.1 | 21.4 | 25.5 | 28.6 | 21.4 | 20.5 |
| 13 | 311 | 24.4 | 23.3 | 22.5 | 19.8 | 26.5 | 25.3 | 24.1 | 21.4 | 24.6 | 26.5 | 20.6 | 18.7 |
| 13 | 312 | 24.6 | 23.6 | 24.7 | 20.3 | 27   | 26   | 25   | 22.7 | 23.8 | 24.6 | 19.9 | 17.1 |
| 14 | 313 | 24.8 | 24.8 | 25.8 | 24.6 | 27.5 | 27.2 | 26.9 | 26.2 | 23   | 21.6 | 19.4 | 20   |
| 14 | 314 | 25.4 | 25.6 | 26.7 | 26.2 | 28   | 27.9 | 27.8 | 27.5 | 22.4 | 20.1 | 18.8 | 18.7 |
| 14 | 315 | 25.9 | 26.3 | 27.2 | 27.5 | 28.5 | 28.6 | 28.7 | 28.8 | 21.8 | 18.8 | 18.3 | 17.6 |
| 14 | 316 | 26.2 | 26.7 | 27.6 | 28.3 | 29   | 29.3 | 29.6 | 30.2 | 21.3 | 17.7 | 17.9 | 16.6 |
| 14 | 317 | 26.4 | 27   | 26.9 | 28.9 | 29.5 | 30   | 30.5 | 31.5 | 20.8 | 16.5 | 17.5 | 15.9 |
| 14 | 318 | 26   | 26.4 | 27.1 | 27.8 | 30.5 | 31.4 | 32.3 | 34.2 | 20.4 | 15.5 | 17.2 | 15   |



|    |     |      |      |      |      |      |      |      |      |      |      |      |      |
|----|-----|------|------|------|------|------|------|------|------|------|------|------|------|
| 14 | 319 | 26.1 | 26.6 | 27.8 | 28.1 | 30.5 | 31.4 | 32.3 | 34.2 | 19.9 | 14.5 | 16.9 | 14.4 |
| 14 | 320 | 26.5 | 27.1 | 27.4 | 29.1 | 30.5 | 31.4 | 32.3 | 34.2 | 19.6 | 13.7 | 16.8 | 14.1 |
| 14 | 321 | 26.3 | 26.9 | 27.1 | 28.6 | 30   | 30.7 | 31.4 | 32.8 | 19.3 | 13   | 16.7 | 14   |
| 14 | 322 | 26.1 | 26.6 | 26.5 | 28.1 | 30   | 30.7 | 31.4 | 32.8 | 19.2 | 12.8 | 16.9 | 14.4 |
| 14 | 323 | 25.8 | 26.2 | 25.8 | 27.3 | 29.5 | 30   | 30.5 | 31.5 | 19.1 | 12.6 | 17.2 | 15.1 |
| 14 | 324 | 25.4 | 25.6 | 25.6 | 26.2 | 29   | 29.3 | 29.6 | 30.2 | 19.6 | 13.7 | 17.7 | 16.3 |
| 14 | 325 | 25.3 | 25.5 | 24.9 | 26   | 28.5 | 28.6 | 28.7 | 28.8 | 21.2 | 17.4 | 18   | 17   |
| 14 | 326 | 24.9 | 24.9 | 24.7 | 24.9 | 28   | 27.9 | 27.8 | 27.5 | 23   | 21.7 | 18.9 | 18.9 |
| 14 | 327 | 24.8 | 24.8 | 24   | 24.6 | 28   | 27.9 | 27.8 | 27.5 | 25   | 26.2 | 19.5 | 20.3 |
| 14 | 328 | 24.4 | 24.2 | 23.8 | 23.6 | 27.5 | 27.2 | 26.9 | 26.2 | 26.9 | 30.7 | 20.1 | 21.8 |
| 14 | 329 | 24.3 | 24.1 | 23.3 | 23.3 | 27.5 | 27.2 | 26.9 | 26.2 | 28.6 | 34.5 | 20.8 | 23.4 |
| 14 | 330 | 24   | 23.6 | 23.1 | 22.5 | 27   | 26.5 | 26   | 24.9 | 29.8 | 37.3 | 21.7 | 25.5 |
| 14 | 331 | 23.9 | 23.5 | 22.2 | 22.2 | 27   | 26.5 | 26   | 24.9 | 30.4 | 38.7 | 22.1 | 26.4 |
| 14 | 332 | 23.4 | 22.8 | 21.8 | 20.9 | 26.5 | 25.8 | 25.1 | 23.5 | 30.5 | 38.8 | 21.7 | 25.4 |
| 14 | 333 | 23.2 | 22.5 | 21.1 | 20.4 | 26.5 | 25.8 | 25.1 | 23.5 | 30   | 37.8 | 20.8 | 23.4 |
| 14 | 334 | 22.8 | 22   | 21.1 | 19.3 | 26.5 | 25.8 | 25.1 | 23.5 | 29.3 | 36.1 | 19.9 | 21.3 |
| 14 | 335 | 22.8 | 22   | 21.7 | 19.3 | 26.5 | 25.8 | 25.1 | 23.5 | 28.4 | 33.9 | 19   | 19.3 |
| 14 | 336 | 23.1 | 22.4 | 23.3 | 20.1 | 27   | 26.5 | 26   | 24.9 | 27.4 | 31.7 | 18.2 | 17.3 |
| 15 | 337 | 23.9 | 23.6 | 24.9 | 22.7 | 27.5 | 26.7 | 26   | 24.3 | 26.5 | 27.4 | 17.4 | 12.3 |
| 15 | 338 | 24.8 | 24.9 | 26.7 | 25.1 | 28   | 27.4 | 26.9 | 25.6 | 25.7 | 25.6 | 16.5 | 10.5 |
| 15 | 339 | 25.8 | 26.3 | 29.3 | 27.8 | 29   | 28.8 | 28.7 | 28.3 | 25   | 23.9 | 15.9 | 8.9  |
| 15 | 340 | 27.2 | 28.2 | 30.9 | 31.5 | 30.5 | 30.9 | 31.4 | 32.3 | 24.4 | 22.5 | 15.2 | 7.3  |
| 15 | 341 | 28.1 | 29.5 | 31.2 | 33.9 | 31.5 | 32.3 | 33.2 | 34.9 | 23.8 | 21.2 | 14.5 | 5.7  |
| 15 | 342 | 28.3 | 29.8 | 30.9 | 34.4 | 32.5 | 33.7 | 35   | 37.6 | 23.3 | 20.1 | 13.9 | 4.3  |
| 15 | 343 | 28.1 | 29.5 | 29.6 | 33.9 | 32.5 | 33.7 | 35   | 37.6 | 22.9 | 19.1 | 13.3 | 3    |
| 15 | 344 | 27.4 | 28.5 | 28.9 | 32   | 33   | 34.4 | 35.9 | 38.9 | 22.5 | 18.1 | 12.9 | 2    |
| 15 | 345 | 27   | 28   | 27.6 | 31   | 32.5 | 33.7 | 35   | 37.6 | 22.1 | 17.3 | 12.9 | 2.1  |
| 15 | 346 | 26.3 | 27   | 26.7 | 29.1 | 32   | 33   | 34.1 | 36.3 | 21.8 | 16.7 | 13.7 | 4    |
| 15 | 347 | 25.8 | 26.3 | 26   | 27.8 | 31.5 | 32.3 | 33.2 | 34.9 | 21.8 | 16.5 | 15.9 | 8.9  |
| 15 | 348 | 25.4 | 25.7 | 24.9 | 26.7 | 31   | 31.6 | 32.3 | 33.6 | 22.3 | 17.8 | 18.5 | 15.1 |
| 15 | 349 | 24.8 | 24.9 | 24   | 25.1 | 30   | 30.2 | 30.5 | 30.9 | 23   | 19.5 | 21.6 | 22.1 |
| 15 | 350 | 24.3 | 24.2 | 23.1 | 23.8 | 30   | 30.2 | 30.5 | 30.9 | 24.4 | 22.5 | 24.9 | 29.8 |
| 15 | 351 | 23.8 | 23.5 | 22.2 | 22.4 | 29.5 | 29.5 | 29.6 | 29.6 | 26   | 26.2 | 28.2 | 37.2 |
| 15 | 352 | 23.3 | 22.8 | 21.7 | 21.1 | 28.5 | 28.1 | 27.8 | 26.9 | 27.9 | 30.6 | 30.4 | 42.4 |
| 15 | 353 | 23   | 22.4 | 21.2 | 20.3 | 28   | 27.4 | 26.9 | 25.6 | 29.3 | 34   | 31.7 | 45.3 |
| 15 | 354 | 22.7 | 21.9 | 20.4 | 19.5 | 27.5 | 26.7 | 26   | 24.3 | 30.4 | 36.4 | 32   | 46   |
| 15 | 355 | 22.3 | 21.4 | 19.9 | 18.5 | 27.5 | 26.7 | 26   | 24.3 | 30.8 | 37.3 | 31.3 | 44.4 |
| 15 | 356 | 22   | 21   | 19.4 | 17.7 | 27   | 26   | 25.1 | 23   | 30.2 | 36   | 29.4 | 40.1 |
| 15 | 357 | 21.7 | 20.5 | 18.8 | 16.9 | 27   | 26   | 25.1 | 23   | 29.9 | 35.2 | 27.4 | 35.5 |
| 15 | 358 | 21.4 | 20.1 | 18.8 | 16.1 | 27   | 26   | 25.1 | 23   | 29.2 | 33.6 | 25.6 | 31.2 |
| 15 | 359 | 21.4 | 20.1 | 19.9 | 16.1 | 26.5 | 25.3 | 24.2 | 21.6 | 28.4 | 31.8 | 23.9 | 27.3 |
| 15 | 360 | 22   | 21   | 21   | 17.7 | 26.5 | 25.3 | 24.2 | 21.6 | 27.5 | 29.8 | 22.4 | 23.9 |
| 16 | 361 | 22.9 | 22   | 23.4 | 19   | 26.5 | 26.5 | 26.5 | 26.6 | 26.7 | 26.7 | 21   | 17.2 |
| 16 | 362 | 24.2 | 23.8 | 25.3 | 22.5 | 26.5 | 26.5 | 26.5 | 26.6 | 26   | 25.1 | 19.9 | 14.6 |
| 16 | 363 | 25.3 | 25.3 | 28   | 25.4 | 27   | 27.2 | 27.4 | 27.9 | 25.3 | 23.5 | 18.8 | 12.1 |
| 16 | 364 | 26.8 | 27.4 | 30.7 | 29.4 | 27   | 27.2 | 27.4 | 27.9 | 24.7 | 22.1 | 17.9 | 10.1 |
| 16 | 365 | 28.3 | 29.5 | 31.6 | 33.4 | 27.5 | 27.9 | 28.3 | 29.2 | 24.1 | 20.9 | 17.1 | 8.2  |
| 16 | 366 | 28.8 | 30.2 | 32.4 | 34.7 | 27.5 | 27.9 | 28.3 | 29.2 | 23.6 | 19.7 | 16.4 | 6.7  |
| 16 | 367 | 29.2 | 30.8 | 31.8 | 35.8 | 27.5 | 27.9 | 28.3 | 29.2 | 23.2 | 18.7 | 15.7 | 5.1  |
| 16 | 368 | 28.9 | 30.4 | 30   | 35   | 27.5 | 27.9 | 28.3 | 29.2 | 22.8 | 17.7 | 15.2 | 3.9  |
| 16 | 369 | 27.9 | 29   | 28.6 | 32.3 | 27   | 27.2 | 27.4 | 27.9 | 22.3 | 16.8 | 15.2 | 3.9  |
| 16 | 370 | 27.1 | 27.8 | 27.7 | 30.2 | 27   | 27.2 | 27.4 | 27.9 | 22.1 | 16.2 | 16.2 | 6.2  |
| 16 | 371 | 26.6 | 27.1 | 26.4 | 28.8 | 27   | 27.2 | 27.4 | 27.9 | 21.9 | 15.8 | 18.5 | 11.4 |
| 16 | 372 | 25.9 | 26.2 | 25.5 | 27   | 27   | 27.2 | 27.4 | 27.9 | 22.3 | 16.7 | 21.7 | 18.7 |
| 16 | 373 | 25.4 | 25.5 | 24.6 | 25.6 | 26.5 | 26.5 | 26.5 | 26.6 | 23.9 | 20.4 | 25.2 | 26.9 |
| 16 | 374 | 24.9 | 24.8 | 23.7 | 24.3 | 26.5 | 26.5 | 26.5 | 26.6 | 25.7 | 24.6 | 28.7 | 35   |
| 16 | 375 | 24.4 | 24.1 | 23.4 | 23   | 26   | 25.8 | 25.6 | 25.2 | 27.6 | 28.9 | 31.7 | 41.7 |
| 16 | 376 | 24.2 | 23.8 | 22.6 | 22.5 | 26   | 25.8 | 25.6 | 25.2 | 29.3 | 32.8 | 33.5 | 46   |
| 16 | 377 | 23.8 | 23.2 | 21.9 | 21.4 | 26   | 25.8 | 25.6 | 25.2 | 30.7 | 36   | 33.7 | 46.5 |
| 16 | 378 | 23.4 | 22.7 | 21.7 | 20.3 | 25.5 | 25.1 | 24.7 | 23.9 | 31.6 | 38.1 | 32.8 | 44.3 |
| 16 | 379 | 23.3 | 22.5 | 21   | 20.1 | 25.5 | 25.1 | 24.7 | 23.9 | 32.1 | 39.2 | 32.6 | 43.9 |
| 16 | 380 | 22.9 | 22   | 21   | 19   | 25.5 | 25.1 | 24.7 | 23.9 | 32.1 | 39.3 | 31.5 | 41.3 |
| 16 | 381 | 22.9 | 22   | 20.7 | 19   | 25.5 | 25.1 | 24.7 | 23.9 | 31.7 | 38.3 | 29.9 | 37.7 |
| 16 | 382 | 22.7 | 21.7 | 20.8 | 18.5 | 25.5 | 25.1 | 24.7 | 23.9 | 30.9 | 36.4 | 28.4 | 34.3 |
| 16 | 383 | 22.8 | 21.8 | 22.1 | 18.7 | 25.5 | 25.1 | 24.7 | 23.9 | 30   | 34.3 | 27   | 31   |

|    |     |      |      |      |      |      |      |      |      |      |      |      |      |
|----|-----|------|------|------|------|------|------|------|------|------|------|------|------|
| 16 | 384 | 23.5 | 22.8 | 23.3 | 20.6 | 26   | 25.8 | 25.6 | 25.2 | 28.7 | 31.4 | 25.6 | 27.7 |
| 17 | 385 | 24.6 | 24   | 24.9 | 21.9 | 27   | 26.7 | 26.4 | 25.8 | 26.6 | 28.2 | 24.4 | 22.9 |
| 17 | 386 | 25.5 | 25.2 | 27.1 | 24.3 | 27   | 26.7 | 26.4 | 25.8 | 25.5 | 25.5 | 23.2 | 20.3 |
| 17 | 387 | 26.7 | 26.9 | 29.6 | 27.5 | 27   | 26.7 | 26.4 | 25.8 | 24.6 | 23.5 | 22.3 | 18.1 |
| 17 | 388 | 28.1 | 28.9 | 30.9 | 31.2 | 27.5 | 27.4 | 27.3 | 27.1 | 23.9 | 21.8 | 21.6 | 16.5 |
| 17 | 389 | 28.8 | 29.8 | 32.3 | 33.1 | 28   | 28.1 | 28.2 | 28.4 | 23.2 | 20.3 | 20.9 | 14.9 |
| 17 | 390 | 29.6 | 31   | 33.2 | 35.2 | 29   | 29.5 | 30   | 31.1 | 22.6 | 18.9 | 20.4 | 13.6 |
| 17 | 391 | 30.1 | 31.7 | 33   | 36.5 | 29   | 29.5 | 30   | 31.1 | 22.1 | 17.8 | 20   | 12.8 |
| 17 | 392 | 30   | 31.5 | 31.6 | 36.3 | 29.5 | 30.2 | 30.9 | 32.4 | 21.7 | 16.8 | 19.7 | 12.1 |
| 17 | 393 | 29.2 | 30.4 | 30.3 | 34.1 | 29.5 | 30.2 | 30.9 | 32.4 | 21.4 | 16.1 | 19.7 | 12.2 |
| 17 | 394 | 28.5 | 29.4 | 29.2 | 32.3 | 29   | 29.5 | 30   | 31.1 | 21.3 | 15.9 | 20.2 | 13.4 |
| 17 | 395 | 27.9 | 28.6 | 27.3 | 30.7 | 29   | 29.5 | 30   | 31.1 | 21.2 | 15.8 | 21.2 | 15.5 |
| 17 | 396 | 26.8 | 27   | 26.2 | 27.8 | 28.5 | 28.8 | 29.1 | 29.7 | 21.6 | 16.6 | 23.1 | 19.8 |
| 17 | 397 | 26.2 | 26.2 | 25.5 | 26.2 | 28.5 | 28.8 | 29.1 | 29.7 | 23.1 | 20   | 25.1 | 24.4 |
| 17 | 398 | 25.8 | 25.6 | 24.7 | 25.1 | 28.5 | 28.8 | 29.1 | 29.7 | 24.7 | 23.8 | 26.8 | 28.5 |
| 17 | 399 | 25.4 | 25.1 | 23.8 | 24   | 28   | 28.1 | 28.2 | 28.4 | 26.5 | 27.8 | 29.1 | 33.6 |
| 17 | 400 | 24.9 | 24.4 | 23.7 | 22.7 | 28   | 28.1 | 28.2 | 28.4 | 28.1 | 31.6 | 30.8 | 37.7 |
| 17 | 401 | 24.8 | 24.2 | 22.9 | 22.4 | 27.5 | 27.4 | 27.3 | 27.1 | 29.4 | 34.5 | 32   | 40.5 |
| 17 | 402 | 24.4 | 23.7 | 22.8 | 21.4 | 27   | 26.7 | 26.4 | 25.8 | 29.7 | 35.3 | 32.9 | 42.4 |
| 17 | 403 | 24.3 | 23.5 | 22   | 21.1 | 27   | 26.7 | 26.4 | 25.8 | 30   | 35.9 | 32.4 | 41.4 |
| 17 | 404 | 23.9 | 23   | 21.9 | 20   | 26.5 | 26   | 25.5 | 24.4 | 30.1 | 36.1 | 31.5 | 39.4 |
| 17 | 405 | 23.8 | 22.8 | 21.1 | 19.8 | 26   | 25.3 | 24.6 | 23.1 | 29.8 | 35.4 | 30.5 | 36.9 |
| 17 | 406 | 23.4 | 22.3 | 21.1 | 18.7 | 26   | 25.3 | 24.6 | 23.1 | 29   | 33.7 | 29.4 | 34.5 |
| 17 | 407 | 23.4 | 22.3 | 21   | 18.7 | 26   | 25.3 | 24.6 | 23.1 | 28.3 | 32   | 28.3 | 31.9 |
| 17 | 408 | 23.3 | 22.1 | 19.4 | 18.4 | 27   | 26.7 | 26.4 | 25.8 | 27.6 | 30.3 | 27.2 | 29.5 |
| 18 | 409 | 21.9 | 20.6 | 21   | 16.7 | 28   | 27.8 | 27.6 | 27.2 | 19.8 | 14.1 | 26.3 | 23.7 |
| 18 | 410 | 22.8 | 21.9 | 23.5 | 19.1 | 29.5 | 29.9 | 30.3 | 31.2 | 21.1 | 17   | 25.6 | 21.9 |
| 18 | 411 | 24.2 | 23.9 | 26.4 | 22.8 | 30.5 | 31.3 | 32.1 | 33.9 | 21   | 16.9 | 24.9 | 20.3 |
| 18 | 412 | 25.8 | 26.1 | 28.9 | 27   | 31.5 | 32.7 | 33.9 | 36.5 | 21   | 16.9 | 24.2 | 18.9 |
| 18 | 413 | 27.2 | 28.1 | 30.4 | 30.8 | 32   | 33.4 | 34.8 | 37.8 | 20.8 | 16.5 | 23.6 | 17.5 |
| 18 | 414 | 28   | 29.2 | 30.9 | 32.9 | 32   | 33.4 | 34.8 | 37.8 | 20.7 | 16.2 | 23.1 | 16.2 |
| 18 | 415 | 28.3 | 29.6 | 30.7 | 33.7 | 31.5 | 32.7 | 33.9 | 36.5 | 20.6 | 15.9 | 22.4 | 14.7 |
| 18 | 416 | 28.2 | 29.5 | 30.2 | 33.4 | 31.5 | 32.7 | 33.9 | 36.5 | 20.4 | 15.4 | 21.9 | 13.6 |
| 18 | 417 | 27.9 | 29   | 29.5 | 32.6 | 31   | 32   | 33   | 35.2 | 20.2 | 15   | 21.7 | 13   |
| 18 | 418 | 27.5 | 28.5 | 28.6 | 31.6 | 30   | 30.6 | 31.2 | 32.5 | 20.1 | 14.7 | 22.3 | 14.5 |
| 18 | 419 | 27   | 27.8 | 24.2 | 30.2 | 29.5 | 29.9 | 30.3 | 31.2 | 20.1 | 14.7 | 23.9 | 18   |
| 18 | 420 | 24.6 | 24.4 | 24.2 | 23.9 | 28.5 | 28.5 | 28.5 | 28.5 | 20.6 | 16   | 26.2 | 23.5 |
| 18 | 421 | 24.6 | 24.4 | 24.4 | 23.9 | 28   | 27.8 | 27.6 | 27.2 | 22.3 | 19.9 | 29.1 | 30   |
| 18 | 422 | 24.7 | 24.6 | 23.9 | 24.1 | 27.5 | 27.1 | 26.7 | 25.9 | 24.4 | 24.6 | 31.7 | 36   |
| 18 | 423 | 24.4 | 24.1 | 23.7 | 23.3 | 27.5 | 27.1 | 26.7 | 25.9 | 26.5 | 29.5 | 33.2 | 39.6 |
| 18 | 424 | 24.3 | 24   | 23.2 | 23.1 | 27   | 26.4 | 25.8 | 24.5 | 28   | 33.1 | 35   | 43.6 |
| 18 | 425 | 24   | 23.6 | 23   | 22.3 | 26.5 | 25.7 | 24.9 | 23.2 | 29.4 | 36.1 | 35.8 | 45.5 |
| 18 | 426 | 23.9 | 23.4 | 22.8 | 22   | 26.5 | 25.7 | 24.9 | 23.2 | 30.1 | 37.9 | 36   | 45.9 |
| 18 | 427 | 23.8 | 23.3 | 22.8 | 21.7 | 26.5 | 25.7 | 24.9 | 23.2 | 30.5 | 38.8 | 35.6 | 45   |
| 18 | 428 | 23.8 | 23.3 | 22.3 | 21.7 | 26   | 25   | 24   | 21.9 | 30   | 37.6 | 34.5 | 42.5 |
| 18 | 429 | 23.5 | 22.9 | 22.1 | 20.9 | 26   | 25   | 24   | 21.9 | 29.2 | 35.7 | 33   | 39   |
| 18 | 430 | 23.4 | 22.7 | 22.4 | 20.7 | 25.5 | 24.3 | 23.1 | 20.6 | 28   | 33.1 | 31.5 | 35.6 |
| 18 | 431 | 23.6 | 23   | 22.8 | 21.2 | 25.5 | 24.3 | 23.1 | 20.6 | 27.1 | 30.9 | 30.1 | 32.3 |
| 18 | 432 | 23.8 | 23.3 | 24.2 | 21.7 | 25.5 | 24.3 | 23.1 | 20.6 | 26.3 | 29   | 28.7 | 29.3 |
| 19 | 433 | 24.1 | 24.2 | 24.9 | 24.3 | 26   | 25.7 | 25.5 | 24.9 | 25.5 | 27.7 | 27.5 | 26.8 |
| 19 | 434 | 24.5 | 24.7 | 25.7 | 25.4 | 26   | 25.7 | 25.5 | 24.9 | 24.8 | 26   | 26.4 | 24.2 |
| 19 | 435 | 24.9 | 25.3 | 25.8 | 26.5 | 26.5 | 26.4 | 26.4 | 26.2 | 24.3 | 24.8 | 25.3 | 21.8 |
| 19 | 436 | 25   | 25.4 | 26   | 26.7 | 27   | 27.1 | 27.3 | 27.6 | 21.8 | 19.2 | 24.4 | 19.8 |
| 19 | 437 | 25.1 | 25.6 | 26.6 | 27   | 28   | 28.5 | 29.1 | 30.2 | 21.8 | 19.2 | 23.6 | 17.8 |
| 19 | 438 | 25.4 | 26   | 26.4 | 27.8 | 28.5 | 29.2 | 30   | 31.5 | 21.7 | 19   | 22.8 | 16   |
| 19 | 439 | 25.3 | 25.8 | 26   | 27.5 | 29   | 29.9 | 30.9 | 32.9 | 21.6 | 18.7 | 22.1 | 14.3 |
| 19 | 440 | 25.1 | 25.6 | 26   | 27   | 29   | 29.9 | 30.9 | 32.9 | 21.5 | 18.3 | 21.5 | 13   |
| 19 | 441 | 25.1 | 25.6 | 25.5 | 27   | 29   | 29.9 | 30.9 | 32.9 | 21.3 | 17.9 | 21.2 | 12.3 |
| 19 | 442 | 24.8 | 25.1 | 25.1 | 26.2 | 28.5 | 29.2 | 30   | 31.5 | 21.2 | 17.8 | 21.7 | 13.6 |
| 19 | 443 | 24.6 | 24.9 | 24.8 | 25.7 | 28   | 28.5 | 29.1 | 30.2 | 21.3 | 17.9 | 23.2 | 17   |
| 19 | 444 | 24.4 | 24.6 | 24   | 25.1 | 27.5 | 27.8 | 28.2 | 28.9 | 21.4 | 18.3 | 25.6 | 22.4 |
| 19 | 445 | 24   | 24   | 23.7 | 24.1 | 27   | 27.1 | 27.3 | 27.6 | 22   | 19.6 | 28.3 | 28.7 |
| 19 | 446 | 23.8 | 23.7 | 23.1 | 23.5 | 27   | 27.1 | 27.3 | 27.6 | 22.7 | 21.2 | 31.2 | 35.3 |
| 19 | 447 | 23.5 | 23.3 | 23   | 22.7 | 26.5 | 26.4 | 26.4 | 26.2 | 23.7 | 23.5 | 32.6 | 38.6 |
| 19 | 448 | 23.4 | 23.2 | 22.8 | 22.5 | 26   | 25.7 | 25.5 | 24.9 | 25.2 | 26.8 | 33.7 | 41   |

|    |     |      |      |      |      |      |      |      |      |      |      |      |      |
|----|-----|------|------|------|------|------|------|------|------|------|------|------|------|
| 19 | 449 | 23.3 | 23   | 22.1 | 22.2 | 26   | 25.7 | 25.5 | 24.9 | 26   | 28.8 | 34.4 | 42.7 |
| 19 | 450 | 22.9 | 22.5 | 22.1 | 21.1 | 25.5 | 25   | 24.6 | 23.6 | 27.2 | 31.5 | 35   | 44   |
| 19 | 451 | 22.9 | 22.5 | 21.9 | 21.1 | 25   | 24.3 | 23.7 | 22.2 | 27.1 | 31.3 | 35   | 44.2 |
| 19 | 452 | 22.8 | 22.3 | 21.9 | 20.9 | 25   | 24.3 | 23.7 | 22.2 | 27.4 | 32   | 34.2 | 42.2 |
| 19 | 453 | 22.8 | 22.3 | 21.2 | 20.9 | 24.5 | 23.6 | 22.8 | 20.9 | 27   | 31.1 | 32.7 | 38.9 |
| 19 | 454 | 22.4 | 21.8 | 21.2 | 19.8 | 24.5 | 23.6 | 22.8 | 20.9 | 26.4 | 29.6 | 31.3 | 35.6 |
| 19 | 455 | 22.4 | 21.8 | 21.5 | 19.8 | 24.5 | 23.6 | 22.8 | 20.9 | 25.8 | 28.3 | 30   | 32.6 |
| 19 | 456 | 22.6 | 22.1 | 22.8 | 20.3 | 25.5 | 25   | 24.6 | 23.6 | 25.2 | 27   | 28.7 | 29.7 |
| 20 | 457 | 22.8 | 22.8 | 22.8 | 22.8 | 26.5 | 25.7 | 24.9 | 23.1 | 24.6 | 26.5 | 27.6 | 28.5 |
| 20 | 458 | 22.8 | 22.8 | 23.1 | 22.8 | 28   | 27.8 | 27.6 | 27.1 | 24.1 | 25.3 | 26.5 | 26   |
| 20 | 459 | 23   | 23.1 | 23.3 | 23.3 | 29.5 | 29.9 | 30.3 | 31.1 | 23.6 | 24.2 | 25.6 | 23.9 |
| 20 | 460 | 23.1 | 23.2 | 24   | 23.5 | 30.5 | 31.3 | 32.1 | 33.8 | 23.2 | 23.2 | 24.7 | 21.9 |
| 20 | 461 | 23.5 | 23.8 | 24   | 24.6 | 31.5 | 32.7 | 33.9 | 36.4 | 22.8 | 22.3 | 24   | 20.3 |
| 20 | 462 | 23.5 | 23.8 | 24.6 | 24.6 | 32.5 | 34.1 | 35.7 | 39.1 | 22.3 | 21.2 | 23.3 | 18.7 |
| 20 | 463 | 23.8 | 24.2 | 24.9 | 25.4 | 32.5 | 34.1 | 35.7 | 39.1 | 21.9 | 20.3 | 22.6 | 17.1 |
| 20 | 464 | 24   | 24.5 | 25.1 | 25.9 | 32.5 | 34.1 | 35.7 | 39.1 | 21.5 | 19.5 | 22.1 | 15.8 |
| 20 | 465 | 24.1 | 24.6 | 25.1 | 26.2 | 31.5 | 32.7 | 33.9 | 36.4 | 21.1 | 18.5 | 21.9 | 15.4 |
| 20 | 466 | 24.1 | 24.6 | 24.9 | 26.2 | 31   | 32   | 33   | 35.1 | 20.9 | 17.9 | 22.4 | 16.5 |
| 20 | 467 | 24   | 24.5 | 24.6 | 25.9 | 30   | 30.6 | 31.2 | 32.4 | 20.7 | 17.7 | 23.7 | 19.7 |
| 20 | 468 | 23.8 | 24.2 | 23.7 | 25.4 | 29.5 | 29.9 | 30.3 | 31.1 | 20.8 | 17.8 | 25.6 | 24   |
| 20 | 469 | 23.3 | 23.5 | 23   | 24.1 | 29   | 29.2 | 29.4 | 29.8 | 21   | 18.2 | 27.1 | 27.5 |
| 20 | 470 | 22.9 | 22.9 | 22.8 | 23   | 28.5 | 28.5 | 28.5 | 28.4 | 21.4 | 19.1 | 29.6 | 33.1 |
| 20 | 471 | 22.8 | 22.8 | 22.1 | 22.8 | 28   | 27.8 | 27.6 | 27.1 | 22.6 | 21.8 | 30.7 | 35.6 |
| 20 | 472 | 22.4 | 22.2 | 21.9 | 21.7 | 27.5 | 27.1 | 26.7 | 25.8 | 23.4 | 23.9 | 31.1 | 36.7 |
| 20 | 473 | 22.3 | 22.1 | 21.2 | 21.4 | 27   | 26.4 | 25.8 | 24.4 | 23.7 | 24.5 | 31.2 | 36.8 |
| 20 | 474 | 21.9 | 21.5 | 21.2 | 20.4 | 26.5 | 25.7 | 24.9 | 23.1 | 24.5 | 26.2 | 30.7 | 35.8 |
| 20 | 475 | 21.9 | 21.5 | 20.8 | 20.4 | 26   | 25   | 24   | 21.8 | 25.6 | 28.8 | 30.6 | 35.5 |
| 20 | 476 | 21.7 | 21.2 | 20.3 | 19.8 | 25.5 | 24.3 | 23.1 | 20.5 | 25.9 | 29.6 | 30.4 | 34.9 |
| 20 | 477 | 21.4 | 20.8 | 20.3 | 19   | 25.5 | 24.3 | 23.1 | 20.5 | 25.9 | 29.4 | 29.7 | 33.3 |
| 20 | 478 | 21.4 | 20.8 | 20.3 | 19   | 25   | 23.6 | 22.2 | 19.1 | 25.3 | 28   | 28.8 | 31.3 |
| 20 | 479 | 21.4 | 20.8 | 21.3 | 19   | 25   | 23.6 | 22.2 | 19.1 | 24.6 | 26.6 | 27.9 | 29.2 |
| 20 | 480 | 22   | 21.7 | 20.7 | 20.6 | 26   | 25   | 24   | 21.8 | 23.9 | 25   | 26.9 | 27   |
| 21 | 481 | 22.9 | 21.8 | 22.3 | 18.3 | 27   | 26   | 25   | 22.7 | 23.3 | 23   | 26.1 | 28.1 |
| 21 | 482 | 23.8 | 23   | 24.5 | 20.7 | 28.5 | 28.1 | 27.7 | 26.7 | 22.8 | 21.7 | 25.4 | 26.5 |
| 21 | 483 | 25   | 24.7 | 26.6 | 23.9 | 30   | 30.2 | 30.4 | 30.7 | 22.3 | 20.7 | 24.8 | 25   |
| 21 | 484 | 26.2 | 26.4 | 28.4 | 27.1 | 31.5 | 32.3 | 33.1 | 34.7 | 21.9 | 19.8 | 24.2 | 23.7 |
| 21 | 485 | 27.2 | 27.8 | 30   | 29.7 | 32.5 | 33.7 | 34.9 | 37.4 | 21.5 | 18.9 | 23.7 | 22.6 |
| 21 | 486 | 28.1 | 29.1 | 30.6 | 32.1 | 33   | 34.4 | 35.8 | 38.7 | 21.2 | 18.1 | 23.4 | 21.9 |
| 21 | 487 | 28.4 | 29.5 | 30.4 | 32.9 | 33   | 34.4 | 35.8 | 38.7 | 20.9 | 17.5 | 23.1 | 21.2 |
| 21 | 488 | 28.3 | 29.3 | 29.5 | 32.6 | 32.5 | 33.7 | 34.9 | 37.4 | 20.6 | 16.8 | 22.9 | 20.7 |
| 21 | 489 | 27.8 | 28.6 | 28.6 | 31.3 | 32   | 33   | 34   | 36   | 20.3 | 16.1 | 22.5 | 19.7 |
| 21 | 490 | 27.3 | 27.9 | 27.7 | 30   | 31.5 | 32.3 | 33.1 | 34.7 | 20.1 | 15.7 | 22.1 | 18.9 |
| 21 | 491 | 26.8 | 27.2 | 27   | 28.6 | 31   | 31.6 | 32.2 | 33.4 | 20   | 15.5 | 22.1 | 18.9 |
| 21 | 492 | 26.4 | 26.7 | 26.4 | 27.6 | 30.5 | 30.9 | 31.3 | 32.1 | 20.5 | 16.5 | 22.7 | 20.2 |
| 21 | 493 | 26.1 | 26.3 | 25.9 | 26.8 | 30   | 30.2 | 30.4 | 30.7 | 22   | 20   | 23.9 | 23   |
| 21 | 494 | 25.8 | 25.8 | 25.4 | 26   | 29.5 | 29.5 | 29.5 | 29.4 | 23.5 | 23.5 | 26   | 27.8 |
| 21 | 495 | 25.5 | 25.4 | 25   | 25.2 | 29   | 28.8 | 28.6 | 28.1 | 25.4 | 27.9 | 27.4 | 30.9 |
| 21 | 496 | 25.3 | 25.1 | 24.5 | 24.7 | 28.5 | 28.1 | 27.7 | 26.7 | 27.4 | 32.3 | 28   | 32.4 |
| 21 | 497 | 25   | 24.7 | 24.1 | 23.9 | 28   | 27.4 | 26.8 | 25.4 | 28.3 | 34.6 | 28.1 | 32.5 |
| 21 | 498 | 24.8 | 24.4 | 23.6 | 23.3 | 28   | 27.4 | 26.8 | 25.4 | 27.7 | 33.2 | 27.1 | 30.4 |
| 21 | 499 | 24.5 | 24   | 23.4 | 22.5 | 27.5 | 26.7 | 25.9 | 24.1 | 26.8 | 31   | 26.9 | 29.9 |
| 21 | 500 | 24.4 | 23.9 | 23   | 22.3 | 27.5 | 26.7 | 25.9 | 24.1 | 26.5 | 30.4 | 26.1 | 27.9 |
| 21 | 501 | 24.2 | 23.6 | 22.7 | 21.7 | 27   | 26   | 25   | 22.7 | 26.2 | 29.7 | 25.1 | 25.8 |
| 21 | 502 | 24   | 23.3 | 22.8 | 21.2 | 27   | 26   | 25   | 22.7 | 25.7 | 28.6 | 24.1 | 23.5 |
| 21 | 503 | 24.1 | 23.5 | 23.7 | 21.5 | 27   | 26   | 25   | 22.7 | 25.2 | 27.3 | 23   | 20.9 |
| 21 | 504 | 24.6 | 24.2 | 23.8 | 22.8 | 27.5 | 26.7 | 25.9 | 24.1 | 24.6 | 25.9 | 22.1 | 18.7 |
| 22 | 505 | 25.4 | 24.6 | 25.8 | 22.1 | 28.5 | 28.2 | 27.9 | 27.3 | 23.9 | 22.7 | 21.1 | 16.8 |
| 22 | 506 | 26.5 | 26.1 | 27.9 | 25   | 29.5 | 29.6 | 29.7 | 30   | 23.4 | 21.5 | 20.4 | 15.2 |
| 22 | 507 | 27.7 | 27.8 | 30.1 | 28.2 | 30.5 | 31   | 31.5 | 32.6 | 22.9 | 20.5 | 19.7 | 13.6 |
| 22 | 508 | 28.9 | 29.5 | 32.1 | 31.4 | 31   | 31.7 | 32.4 | 34   | 22.5 | 19.4 | 19.2 | 12.3 |
| 22 | 509 | 30   | 31   | 32.8 | 34.3 | 31   | 31.7 | 32.4 | 34   | 22.1 | 18.4 | 18.6 | 11   |
| 22 | 510 | 30.4 | 31.6 | 33   | 35.4 | 31   | 31.7 | 32.4 | 34   | 21.7 | 17.6 | 18   | 9.7  |
| 22 | 511 | 30.5 | 31.7 | 32.6 | 35.6 | 31   | 31.7 | 32.4 | 34   | 21.3 | 16.7 | 17.5 | 8.4  |
| 22 | 512 | 30.3 | 31.5 | 31   | 35.1 | 31   | 31.7 | 32.4 | 34   | 20.9 | 15.9 | 17   | 7.4  |
| 22 | 513 | 29.4 | 30.2 | 30.3 | 32.7 | 30.5 | 31   | 31.5 | 32.6 | 20.6 | 15.2 | 17.1 | 7.6  |

|    |     |      |      |      |      |      |      |      |      |      |      |      |      |
|----|-----|------|------|------|------|------|------|------|------|------|------|------|------|
| 22 | 514 | 29   | 29.6 | 29.4 | 31.6 | 30.5 | 31   | 31.5 | 32.6 | 20.4 | 14.7 | 18.1 | 9.9  |
| 22 | 515 | 28.5 | 28.9 | 28.7 | 30.3 | 30   | 30.3 | 30.6 | 31.3 | 20.3 | 14.4 | 20.1 | 14.5 |
| 22 | 516 | 28.1 | 28.4 | 28.1 | 29.2 | 30   | 30.3 | 30.6 | 31.3 | 20.8 | 15.5 | 22.4 | 19.8 |
| 22 | 517 | 27.8 | 28   | 27.2 | 28.5 | 29.5 | 29.6 | 29.7 | 30   | 22.5 | 19.4 | 25   | 25.7 |
| 22 | 518 | 27.3 | 27.3 | 26.5 | 27.1 | 29   | 28.9 | 28.8 | 28.7 | 24.5 | 24   | 27.6 | 31.7 |
| 22 | 519 | 26.9 | 26.7 | 26   | 26.1 | 29   | 28.9 | 28.8 | 28.7 | 26.5 | 28.7 | 30.1 | 37.3 |
| 22 | 520 | 26.6 | 26.3 | 25.4 | 25.3 | 28.5 | 28.2 | 27.9 | 27.3 | 28.3 | 32.7 | 32   | 41.9 |
| 22 | 521 | 26.3 | 25.9 | 24.7 | 24.5 | 28.5 | 28.2 | 27.9 | 27.3 | 29.7 | 36   | 33.5 | 45.2 |
| 22 | 522 | 25.9 | 25.3 | 24.5 | 23.4 | 28   | 27.5 | 27   | 26   | 30.6 | 38.2 | 33.8 | 45.9 |
| 22 | 523 | 25.8 | 25.2 | 23.8 | 23.1 | 28   | 27.5 | 27   | 26   | 31   | 39.1 | 33.4 | 44.9 |
| 22 | 524 | 25.4 | 24.6 | 23.6 | 22.1 | 27.5 | 26.8 | 26.1 | 24.7 | 31   | 38.9 | 31.8 | 41.4 |
| 22 | 525 | 25.3 | 24.5 | 23.1 | 21.8 | 27.5 | 26.8 | 26.1 | 24.7 | 30.4 | 37.6 | 30   | 37.2 |
| 22 | 526 | 25   | 24   | 23.6 | 21   | 27   | 26.1 | 25.2 | 23.3 | 29.4 | 35.4 | 28.3 | 33.3 |
| 22 | 527 | 25.3 | 24.5 | 24   | 21.8 | 27   | 26.1 | 25.2 | 23.3 | 27.2 | 30.3 | 26.7 | 29.6 |
| 22 | 528 | 25.5 | 24.7 | 26.7 | 22.3 | 27   | 26.1 | 25.2 | 23.3 | 24.4 | 23.8 | 25.3 | 26.4 |
| 23 | 529 | 26.4 | 26.5 | 28.7 | 27   | 27   | 26.8 | 26.7 | 26.3 | 23.2 | 21.5 | 24.1 | 24.6 |
| 23 | 530 | 27.5 | 28.1 | 29.8 | 29.9 | 27.5 | 27.5 | 27.6 | 27.6 | 22.7 | 20.4 | 23.1 | 22.3 |
| 23 | 531 | 28.1 | 28.9 | 30.7 | 31.5 | 28   | 28.2 | 28.5 | 28.9 | 22.3 | 19.5 | 22.1 | 20   |
| 23 | 532 | 28.6 | 29.6 | 29.6 | 32.9 | 28.5 | 28.9 | 29.4 | 30.3 | 22   | 18.6 | 21.4 | 18.4 |
| 23 | 533 | 28   | 28.8 | 28.3 | 31.3 | 29   | 29.6 | 30.3 | 31.6 | 21.6 | 17.8 | 20.9 | 17.1 |
| 23 | 534 | 27.3 | 27.8 | 28.3 | 29.4 | 29.5 | 30.3 | 31.2 | 32.9 | 21.2 | 17   | 20.4 | 15.9 |
| 23 | 535 | 27.3 | 27.8 | 28.3 | 29.4 | 30   | 31   | 32.1 | 34.3 | 20.9 | 16.1 | 19.9 | 14.8 |
| 23 | 536 | 27.3 | 27.8 | 28   | 29.4 | 30   | 31   | 32.1 | 34.3 | 20.5 | 15.2 | 19.4 | 13.6 |
| 23 | 537 | 27.1 | 27.5 | 27.4 | 28.9 | 29.5 | 30.3 | 31.2 | 32.9 | 20.1 | 14.4 | 19.4 | 13.8 |
| 23 | 538 | 26.8 | 27.1 | 27.1 | 28.1 | 29.5 | 30.3 | 31.2 | 32.9 | 19.9 | 13.9 | 20   | 15.1 |
| 23 | 539 | 26.6 | 26.8 | 26.5 | 27.5 | 29   | 29.6 | 30.3 | 31.6 | 19.8 | 13.6 | 21.1 | 17.7 |
| 23 | 540 | 26.3 | 26.4 | 26   | 26.7 | 28.5 | 28.9 | 29.4 | 30.3 | 20.3 | 14.9 | 22.7 | 21.4 |
| 23 | 541 | 26   | 26   | 25.6 | 25.9 | 28   | 28.2 | 28.5 | 28.9 | 22.1 | 19   | 24.2 | 24.9 |
| 23 | 542 | 25.8 | 25.7 | 24.9 | 25.4 | 27.5 | 27.5 | 27.6 | 27.6 | 24.1 | 23.5 | 24.6 | 25.7 |
| 23 | 543 | 25.4 | 25.1 | 24.7 | 24.3 | 27   | 26.8 | 26.7 | 26.3 | 26.1 | 28.1 | 24.9 | 26.3 |
| 23 | 544 | 25.3 | 25   | 24   | 24.1 | 27   | 26.8 | 26.7 | 26.3 | 27.8 | 32   | 25.9 | 28.6 |
| 23 | 545 | 24.9 | 24.4 | 24   | 23   | 26.5 | 26.1 | 25.8 | 24.9 | 29   | 34.9 | 28.1 | 33.6 |
| 23 | 546 | 24.9 | 24.4 | 23.8 | 23   | 26   | 25.4 | 24.9 | 23.6 | 29.9 | 36.9 | 29.1 | 35.9 |
| 23 | 547 | 24.8 | 24.3 | 23.1 | 22.8 | 25.5 | 24.7 | 24   | 22.3 | 30.3 | 37.8 | 29.6 | 37.2 |
| 23 | 548 | 24.4 | 23.7 | 22.9 | 21.7 | 25.5 | 24.7 | 24   | 22.3 | 30.2 | 37.6 | 29.1 | 35.9 |
| 23 | 549 | 24.3 | 23.6 | 22.2 | 21.4 | 25   | 24   | 23.1 | 21   | 29.7 | 36.4 | 27.3 | 31.9 |
| 23 | 550 | 23.9 | 23   | 22.2 | 20.4 | 24.5 | 23.3 | 22.2 | 19.6 | 28.9 | 34.6 | 25.6 | 28   |
| 23 | 551 | 23.9 | 23   | 22.2 | 20.4 | 24.5 | 23.3 | 22.2 | 19.6 | 27.9 | 32.3 | 24.4 | 25.1 |
| 23 | 552 | 23.9 | 23   | 24.6 | 20.4 | 25.5 | 24.7 | 24   | 22.3 | 27.1 | 30.4 | 23.4 | 22.8 |
| 24 | 553 | 24.3 | 24.5 | 25.1 | 24.9 | 26.5 | 26   | 25.4 | 24.3 | 26.3 | 27   | 22.4 | 18.3 |
| 24 | 554 | 24.6 | 24.9 | 26.4 | 25.7 | 27.5 | 27.4 | 27.2 | 26.9 | 25.5 | 25.1 | 21.4 | 16.1 |
| 24 | 555 | 25.3 | 25.9 | 26.6 | 27.6 | 28.5 | 28.8 | 29   | 29.6 | 24.8 | 23.5 | 20.6 | 14.1 |
| 24 | 556 | 25.4 | 26   | 26.8 | 27.8 | 29.5 | 30.2 | 30.8 | 32.2 | 24.1 | 21.9 | 19.8 | 12.4 |
| 24 | 557 | 25.5 | 26.1 | 26.8 | 28.1 | 30   | 30.9 | 31.7 | 33.6 | 23.6 | 20.7 | 19.1 | 10.8 |
| 24 | 558 | 25.5 | 26.1 | 26.6 | 28.1 | 30.5 | 31.6 | 32.6 | 34.9 | 23.1 | 19.7 | 18.5 | 9.4  |
| 24 | 559 | 25.4 | 26   | 26.4 | 27.8 | 31   | 32.3 | 33.5 | 36.2 | 22.7 | 18.6 | 17.9 | 7.9  |
| 24 | 560 | 25.3 | 25.9 | 26.4 | 27.6 | 31   | 32.3 | 33.5 | 36.2 | 22.2 | 17.6 | 17.4 | 6.8  |
| 24 | 561 | 25.3 | 25.9 | 26   | 27.6 | 30.5 | 31.6 | 32.6 | 34.9 | 21.8 | 16.5 | 17.3 | 6.6  |
| 24 | 562 | 25.1 | 25.6 | 25.5 | 27.1 | 30   | 30.9 | 31.7 | 33.6 | 21.5 | 15.9 | 18.2 | 8.8  |
| 24 | 563 | 24.8 | 25.2 | 24.8 | 26.3 | 29.5 | 30.2 | 30.8 | 32.2 | 21.3 | 15.6 | 20   | 12.8 |
| 24 | 564 | 24.4 | 24.6 | 24.6 | 25.2 | 29   | 29.5 | 29.9 | 30.9 | 21.7 | 16.5 | 22.7 | 19.2 |
| 24 | 565 | 24.3 | 24.5 | 23.9 | 24.9 | 28.5 | 28.8 | 29   | 29.6 | 23.3 | 20   | 26   | 26.6 |
| 24 | 566 | 23.9 | 23.9 | 23   | 23.9 | 28   | 28.1 | 28.1 | 28.2 | 24.9 | 23.7 | 29.3 | 34.3 |
| 24 | 567 | 23.4 | 23.2 | 23   | 22.5 | 27.5 | 27.4 | 27.2 | 26.9 | 26.5 | 27.5 | 31.9 | 40.1 |
| 24 | 568 | 23.4 | 23.2 | 22.1 | 22.5 | 27   | 26.7 | 26.3 | 25.6 | 28   | 30.9 | 34   | 45.2 |
| 24 | 569 | 22.9 | 22.5 | 22.1 | 21.2 | 26.5 | 26   | 25.4 | 24.3 | 29.2 | 33.7 | 35.2 | 47.8 |
| 24 | 570 | 22.9 | 22.5 | 21.2 | 21.2 | 26   | 25.3 | 24.5 | 22.9 | 30.2 | 35.9 | 35.2 | 47.9 |
| 24 | 571 | 22.4 | 21.8 | 21.2 | 19.9 | 26   | 25.3 | 24.5 | 22.9 | 30.6 | 37   | 34.5 | 46.2 |
| 24 | 572 | 22.4 | 21.8 | 20.5 | 19.9 | 25.5 | 24.6 | 23.6 | 21.6 | 30.7 | 37.1 | 33.2 | 43.3 |
| 24 | 573 | 22   | 21.2 | 20.3 | 18.8 | 25   | 23.9 | 22.7 | 20.3 | 30.3 | 36.2 | 31.5 | 39.4 |
| 24 | 574 | 21.9 | 21.1 | 20.3 | 18.5 | 24.5 | 23.2 | 21.8 | 18.9 | 29.6 | 34.5 | 30   | 35.8 |
| 24 | 575 | 21.9 | 21.1 | 20.3 | 18.5 | 25   | 23.9 | 22.7 | 20.3 | 28.7 | 32.6 | 28.4 | 32.3 |
| 24 | 576 | 21.9 | 21.1 | 21.6 | 18.5 | 25.5 | 24.6 | 23.6 | 21.6 | 27.9 | 30.5 | 27.2 | 29.4 |
| 25 | 577 | 22.3 | 21.9 | 22.5 | 20.8 | 26.5 | 25.7 | 25   | 23.3 | 27.1 | 27.5 | 26.1 | 24.9 |
| 25 | 578 | 22.8 | 22.6 | 23.6 | 22.2 | 27.5 | 27.1 | 26.8 | 25.9 | 26.4 | 25.9 | 25.1 | 22.6 |

|    |     |      |      |      |      |      |      |      |      |      |      |      |      |
|----|-----|------|------|------|------|------|------|------|------|------|------|------|------|
| 25 | 579 | 23.4 | 23.5 | 25.2 | 23.8 | 28.5 | 28.5 | 28.6 | 28.6 | 25.8 | 24.6 | 24.2 | 20.8 |
| 25 | 580 | 24.3 | 24.7 | 26.1 | 26.2 | 29.5 | 29.9 | 30.4 | 31.3 | 25.3 | 23.4 | 23.5 | 19   |
| 25 | 581 | 24.8 | 25.4 | 27   | 27.5 | 30.5 | 31.3 | 32.2 | 33.9 | 24.8 | 22.3 | 22.9 | 17.7 |
| 25 | 582 | 25.3 | 26.1 | 27.9 | 28.8 | 31.5 | 32.7 | 34   | 36.6 | 24.4 | 21.4 | 22.5 | 16.7 |
| 25 | 583 | 25.8 | 26.8 | 27.7 | 30.1 | 31   | 32   | 33.1 | 35.3 | 24   | 20.3 | 22.1 | 15.7 |
| 25 | 584 | 25.7 | 26.7 | 27   | 29.9 | 31   | 32   | 33.1 | 35.3 | 23.4 | 19   | 21.7 | 15   |
| 25 | 585 | 25.3 | 26.1 | 26.1 | 28.8 | 30.5 | 31.3 | 32.2 | 33.9 | 22.9 | 17.9 | 21.7 | 14.9 |
| 25 | 586 | 24.8 | 25.4 | 25.4 | 27.5 | 30   | 30.6 | 31.3 | 32.6 | 22.5 | 16.9 | 22.2 | 16   |
| 25 | 587 | 24.4 | 24.9 | 25   | 26.4 | 29.5 | 29.9 | 30.4 | 31.3 | 22.2 | 16.3 | 23.6 | 19.2 |
| 25 | 588 | 24.2 | 24.6 | 24.3 | 25.9 | 29.5 | 29.9 | 30.4 | 31.3 | 22.5 | 16.9 | 25.2 | 22.9 |
| 25 | 589 | 23.8 | 24   | 23.4 | 24.8 | 29   | 29.2 | 29.5 | 29.9 | 23.9 | 20.3 | 26.8 | 26.7 |
| 25 | 590 | 23.3 | 23.3 | 22.7 | 23.5 | 28.5 | 28.5 | 28.6 | 28.6 | 25.7 | 24.3 | 28.7 | 31   |
| 25 | 591 | 22.9 | 22.8 | 22   | 22.4 | 28   | 27.8 | 27.7 | 27.3 | 27.4 | 28.2 | 30.5 | 35.1 |
| 25 | 592 | 22.5 | 22.2 | 21.6 | 21.4 | 27.5 | 27.1 | 26.8 | 25.9 | 28.8 | 31.6 | 32   | 38.7 |
| 25 | 593 | 22.3 | 21.9 | 20.9 | 20.8 | 27.5 | 27.1 | 26.8 | 25.9 | 30.2 | 34.8 | 32.7 | 40.3 |
| 25 | 594 | 21.9 | 21.4 | 20.2 | 19.8 | 27   | 26.4 | 25.9 | 24.6 | 31.3 | 37.2 | 32.5 | 39.7 |
| 25 | 595 | 21.5 | 20.8 | 19.8 | 18.7 | 27   | 26.4 | 25.9 | 24.6 | 31.7 | 38.1 | 32.3 | 39.3 |
| 25 | 596 | 21.3 | 20.5 | 19.3 | 18.2 | 26.5 | 25.7 | 25   | 23.3 | 31.4 | 37.5 | 31.9 | 38.4 |
| 25 | 597 | 21   | 20.1 | 19.1 | 17.4 | 26.5 | 25.7 | 25   | 23.3 | 31.3 | 37.1 | 31   | 36.4 |
| 25 | 598 | 20.9 | 20   | 19.1 | 17.1 | 26.5 | 25.7 | 25   | 23.3 | 30.5 | 35.5 | 30   | 34   |
| 25 | 599 | 20.9 | 20   | 19.3 | 17.1 | 26.5 | 25.7 | 25   | 23.3 | 29.6 | 33.3 | 29   | 31.7 |
| 25 | 600 | 21   | 20.1 | 20.8 | 17.4 | 26.5 | 25.7 | 25   | 23.3 | 28.7 | 31.2 | 27.9 | 29.2 |
| 26 | 601 | 21.6 | 21.2 | 21.5 | 19.9 | 26.5 | 25   | 23.5 | 20.3 | 27.8 | 29.3 | 27   | 27.5 |
| 26 | 602 | 22   | 21.8 | 23.1 | 21   | 28   | 27.1 | 26.2 | 24.3 | 27   | 27.5 | 26.2 | 25.8 |
| 26 | 603 | 22.9 | 23   | 24   | 23.4 | 29   | 28.5 | 28   | 26.9 | 26.5 | 26.2 | 25.6 | 24.2 |
| 26 | 604 | 23.4 | 23.7 | 25.3 | 24.7 | 30.5 | 30.6 | 30.7 | 30.9 | 26   | 25.1 | 25   | 22.9 |
| 26 | 605 | 24.1 | 24.7 | 25.7 | 26.6 | 31.5 | 32   | 32.5 | 33.6 | 25.6 | 24.2 | 24.5 | 21.8 |
| 26 | 606 | 24.3 | 25   | 25.8 | 27.1 | 32   | 32.7 | 33.4 | 34.9 | 25.3 | 23.5 | 24.1 | 20.8 |
| 26 | 607 | 24.4 | 25.1 | 26   | 27.4 | 32   | 32.7 | 33.4 | 34.9 | 25   | 22.8 | 23.7 | 20.1 |
| 26 | 608 | 24.5 | 25.3 | 25.7 | 27.6 | 32.5 | 33.4 | 34.3 | 36.2 | 24.5 | 21.8 | 23.4 | 19.3 |
| 26 | 609 | 24.3 | 25   | 25.7 | 27.1 | 32   | 32.7 | 33.4 | 34.9 | 24.1 | 20.9 | 23.5 | 19.5 |
| 26 | 610 | 24.3 | 25   | 24.8 | 27.1 | 32   | 32.7 | 33.4 | 34.9 | 23.9 | 20.4 | 23.9 | 20.5 |
| 26 | 611 | 23.8 | 24.3 | 24   | 25.8 | 32   | 32.7 | 33.4 | 34.9 | 24   | 20.5 | 25   | 22.9 |
| 26 | 612 | 23.4 | 23.7 | 23.9 | 24.7 | 31.5 | 32   | 32.5 | 33.6 | 24.2 | 21   | 26   | 25.2 |
| 26 | 613 | 23.3 | 23.6 | 23   | 24.5 | 31   | 31.3 | 31.6 | 32.2 | 24.6 | 21.9 | 26.9 | 27.4 |
| 26 | 614 | 22.8 | 22.9 | 22.2 | 23.1 | 31   | 31.3 | 31.6 | 32.2 | 25   | 22.8 | 29   | 32.1 |
| 26 | 615 | 22.4 | 22.3 | 21.9 | 22.1 | 30.5 | 30.6 | 30.7 | 30.9 | 25.6 | 24.3 | 30.6 | 35.7 |
| 26 | 616 | 22.2 | 22   | 21.3 | 21.5 | 30.5 | 30.6 | 30.7 | 30.9 | 26.9 | 27.2 | 31.2 | 37.1 |
| 26 | 617 | 21.9 | 21.6 | 20.6 | 20.7 | 30   | 29.9 | 29.8 | 29.6 | 28.1 | 30   | 30.7 | 36   |
| 26 | 618 | 21.5 | 21.1 | 20.3 | 19.7 | 29.5 | 29.2 | 28.9 | 28.3 | 29.3 | 32.8 | 29.7 | 33.7 |
| 26 | 619 | 21.3 | 20.8 | 19.5 | 19.1 | 29.5 | 29.2 | 28.9 | 28.3 | 30   | 34.4 | 28.6 | 31.3 |
| 26 | 620 | 20.9 | 20.2 | 19.4 | 18.1 | 29   | 28.5 | 28   | 26.9 | 30.2 | 34.8 | 28.1 | 30.1 |
| 26 | 621 | 20.8 | 20.1 | 18.8 | 17.8 | 29   | 28.5 | 28   | 26.9 | 30   | 34.4 | 27.4 | 28.5 |
| 26 | 622 | 20.5 | 19.7 | 19.4 | 17   | 29   | 28.5 | 28   | 26.9 | 29.5 | 33.3 | 26.6 | 26.7 |
| 26 | 623 | 20.8 | 20.1 | 19.9 | 17.8 | 28.5 | 27.8 | 27.1 | 25.6 | 28.9 | 31.8 | 25.9 | 25.1 |
| 26 | 624 | 21.1 | 20.5 | 20.3 | 18.6 | 29   | 28.5 | 28   | 26.9 | 28.2 | 30.1 | 25.3 | 23.6 |
| 27 | 625 | 21.6 | 20.9 | 22.2 | 18.8 | 29.5 | 28.7 | 28   | 26.3 | 27.5 | 26.9 | 24.6 | 22.9 |
| 27 | 626 | 22.7 | 22.5 | 23.9 | 21.8 | 30.5 | 30.1 | 29.8 | 29   | 26.9 | 25.6 | 24.2 | 21.9 |
| 27 | 627 | 23.6 | 23.7 | 25.1 | 24.2 | 32   | 32.2 | 32.5 | 33   | 26.3 | 24.3 | 23.8 | 21   |
| 27 | 628 | 24.3 | 24.7 | 27.1 | 26   | 33.5 | 34.3 | 35.2 | 37   | 25.9 | 23.3 | 23.5 | 20.3 |
| 27 | 629 | 25.4 | 26.3 | 28.2 | 28.9 | 34.5 | 35.7 | 37   | 39.6 | 25.5 | 22.4 | 23.2 | 19.7 |
| 27 | 630 | 26   | 27.1 | 28.7 | 30.5 | 35   | 36.4 | 37.9 | 40.9 | 25.2 | 21.7 | 23.1 | 19.3 |
| 27 | 631 | 26.3 | 27.5 | 28.5 | 31.3 | 35   | 36.4 | 37.9 | 40.9 | 25   | 21.4 | 22.6 | 18.3 |
| 27 | 632 | 26.2 | 27.4 | 26.9 | 31.1 | 34.5 | 35.7 | 37   | 39.6 | 24.9 | 21   | 22.4 | 17.8 |
| 27 | 633 | 25.3 | 26.1 | 26   | 28.7 | 34   | 35   | 36.1 | 38.3 | 24.7 | 20.5 | 22.4 | 17.8 |
| 27 | 634 | 24.8 | 25.4 | 25.3 | 27.3 | 33.5 | 34.3 | 35.2 | 37   | 24.5 | 20   | 22.6 | 18.3 |
| 27 | 635 | 24.4 | 24.9 | 24.4 | 26.3 | 33   | 33.6 | 34.3 | 35.6 | 24.2 | 19.5 | 23.1 | 19.4 |
| 27 | 636 | 23.9 | 24.2 | 24.2 | 25   | 33   | 33.6 | 34.3 | 35.6 | 24.4 | 19.9 | 23.8 | 21   |
| 27 | 637 | 23.8 | 24   | 23.3 | 24.7 | 32.5 | 32.9 | 33.4 | 34.3 | 25.6 | 22.7 | 25.7 | 25.4 |
| 27 | 638 | 23.3 | 23.3 | 22.6 | 23.4 | 32   | 32.2 | 32.5 | 33   | 27.3 | 26.5 | 28.3 | 31.3 |
| 27 | 639 | 22.9 | 22.8 | 21.7 | 22.3 | 31.5 | 31.5 | 31.6 | 31.6 | 28.9 | 30.2 | 29.7 | 34.6 |
| 27 | 640 | 22.4 | 22.1 | 21.3 | 21   | 28.5 | 27.3 | 26.2 | 23.7 | 30.2 | 33.1 | 30.7 | 36.8 |
| 27 | 641 | 22.2 | 21.8 | 20.8 | 20.4 | 29.5 | 28.7 | 28   | 26.3 | 31.4 | 35.9 | 32   | 40   |
| 27 | 642 | 21.9 | 21.4 | 20.4 | 19.6 | 29.5 | 28.7 | 28   | 26.3 | 32   | 37.3 | 31.2 | 37.9 |
| 27 | 643 | 21.7 | 21.1 | 19.9 | 19.1 | 29   | 28   | 27.1 | 25   | 32.3 | 38.1 | 30.1 | 35.5 |

|    |     |      |      |      |      |      |      |      |      |      |      |      |      |
|----|-----|------|------|------|------|------|------|------|------|------|------|------|------|
| 27 | 644 | 21.4 | 20.7 | 19.5 | 18.3 | 29   | 28   | 27.1 | 25   | 32.4 | 38.2 | 29.6 | 34.2 |
| 27 | 645 | 21.2 | 20.4 | 19   | 17.8 | 29   | 28   | 27.1 | 25   | 32   | 37.4 | 28.4 | 31.6 |
| 27 | 646 | 20.9 | 20   | 19   | 17   | 28.5 | 27.3 | 26.2 | 23.7 | 31.3 | 35.8 | 27.1 | 28.6 |
| 27 | 647 | 20.9 | 20   | 19.7 | 17   | 28.5 | 27.3 | 26.2 | 23.7 | 30.6 | 34.1 | 26   | 26   |
| 27 | 648 | 21.3 | 20.5 | 20.5 | 18   | 28.5 | 27.3 | 26.2 | 23.7 | 29.8 | 32.2 | 25   | 23.7 |
| 28 | 649 | 22   | 21.3 | 22.2 | 19   | 29   | 28.7 | 28.4 | 27.7 | 29.1 | 33   | 24.1 | 23   |
| 28 | 650 | 22.9 | 22.5 | 24.3 | 21.4 | 29   | 28.7 | 28.4 | 27.7 | 28.6 | 31.8 | 23.2 | 21   |
| 28 | 651 | 24.1 | 24.2 | 26.5 | 24.6 | 29.5 | 29.4 | 29.3 | 29   | 24.2 | 21.8 | 22.4 | 19.2 |
| 28 | 652 | 25.3 | 25.9 | 27.7 | 27.8 | 30   | 30.1 | 30.2 | 30.3 | 23.9 | 20.9 | 21.9 | 17.9 |
| 28 | 653 | 26   | 26.9 | 28.6 | 29.6 | 30.5 | 30.8 | 31.1 | 31.6 | 23.4 | 19.9 | 21.4 | 16.7 |
| 28 | 654 | 26.5 | 27.6 | 29.2 | 31   | 31.5 | 32.2 | 32.9 | 34.3 | 23   | 19   | 20.9 | 15.6 |
| 28 | 655 | 26.8 | 28   | 28.5 | 31.8 | 32   | 32.9 | 33.8 | 35.6 | 22.6 | 18.1 | 20.2 | 14.1 |
| 28 | 656 | 26.4 | 27.4 | 27.4 | 30.7 | 32   | 32.9 | 33.8 | 35.6 | 22.3 | 17.3 | 19.9 | 13.3 |
| 28 | 657 | 25.8 | 26.6 | 26.5 | 29.1 | 32   | 32.9 | 33.8 | 35.6 | 22   | 16.6 | 19.9 | 13.3 |
| 28 | 658 | 25.3 | 25.9 | 25.6 | 27.8 | 32   | 32.9 | 33.8 | 35.6 | 21.8 | 16.2 | 20.2 | 14   |
| 28 | 659 | 24.8 | 25.2 | 24.9 | 26.4 | 32   | 32.9 | 33.8 | 35.6 | 21.8 | 16.2 | 20.4 | 14.6 |
| 28 | 660 | 24.4 | 24.6 | 24   | 25.4 | 31.5 | 32.2 | 32.9 | 34.3 | 22.2 | 17.1 | 21.6 | 17.3 |
| 28 | 661 | 23.9 | 23.9 | 23.8 | 24   | 31   | 31.5 | 32   | 33   | 23.2 | 19.5 | 23.2 | 20.9 |
| 28 | 662 | 23.8 | 23.8 | 23.1 | 23.8 | 30.5 | 30.8 | 31.1 | 31.6 | 25   | 23.6 | 25.3 | 25.8 |
| 28 | 663 | 23.4 | 23.2 | 22.3 | 22.7 | 30   | 30.1 | 30.2 | 30.3 | 27   | 28.1 | 28.6 | 33.2 |
| 28 | 664 | 23   | 22.7 | 22.2 | 21.6 | 29.5 | 29.4 | 29.3 | 29   | 28.6 | 31.8 | 31.2 | 39.4 |
| 28 | 665 | 22.9 | 22.5 | 21.3 | 21.4 | 29   | 28.7 | 28.4 | 27.7 | 29.9 | 34.9 | 32.5 | 42.4 |
| 28 | 666 | 22.4 | 21.8 | 21.3 | 20   | 28.5 | 28   | 27.5 | 26.3 | 30.7 | 36.7 | 32.6 | 42.6 |
| 28 | 667 | 22.4 | 21.8 | 20.4 | 20   | 28.5 | 28   | 27.5 | 26.3 | 31.2 | 37.7 | 31.8 | 40.7 |
| 28 | 668 | 21.9 | 21.1 | 20.4 | 18.7 | 28   | 27.3 | 26.6 | 25   | 31.1 | 37.7 | 30.2 | 37.1 |
| 28 | 669 | 21.9 | 21.1 | 20.2 | 18.7 | 27.5 | 26.6 | 25.7 | 23.7 | 30.6 | 36.5 | 28.7 | 33.7 |
| 28 | 670 | 21.8 | 21   | 20.2 | 18.5 | 27   | 25.9 | 24.8 | 22.3 | 29.7 | 34.3 | 27.4 | 30.5 |
| 28 | 671 | 21.8 | 21   | 20.7 | 18.5 | 27   | 25.9 | 24.8 | 22.3 | 28.7 | 32.1 | 26.1 | 27.5 |
| 28 | 672 | 22.1 | 21.4 | 20.4 | 19.3 | 28   | 27.3 | 26.6 | 25   | 27.9 | 30.1 | 24.9 | 24.8 |
| 29 | 673 | 22.5 | 21.4 | 22   | 18.1 | 29   | 28.3 | 27.6 | 26.1 | 27.1 | 31.1 | 23.7 | 20.4 |
| 29 | 674 | 23.4 | 22.7 | 24   | 20.5 | 30   | 29.7 | 29.4 | 28.8 | 26.4 | 29.4 | 22.7 | 18.1 |
| 29 | 675 | 24.5 | 24.2 | 25.8 | 23.4 | 31   | 31.1 | 31.2 | 31.4 | 21.1 | 17.2 | 21.9 | 16.1 |
| 29 | 676 | 25.5 | 25.6 | 27.6 | 26.1 | 32   | 32.5 | 33   | 34.1 | 21   | 17.1 | 21.1 | 14.2 |
| 29 | 677 | 26.5 | 27   | 28.5 | 28.7 | 33.5 | 34.6 | 35.7 | 38.1 | 21   | 17   | 20.2 | 12.3 |
| 29 | 678 | 27   | 27.7 | 28.7 | 30.1 | 34   | 35.3 | 36.6 | 39.4 | 20.9 | 16.8 | 19.6 | 10.7 |
| 29 | 679 | 27.1 | 27.9 | 28.3 | 30.3 | 34   | 35.3 | 36.6 | 39.4 | 20.8 | 16.6 | 18.9 | 9.2  |
| 29 | 680 | 26.9 | 27.6 | 28.1 | 29.8 | 33.5 | 34.6 | 35.7 | 38.1 | 20.7 | 16.3 | 18.3 | 7.9  |
| 29 | 681 | 26.8 | 27.5 | 27.6 | 29.5 | 33   | 33.9 | 34.8 | 36.7 | 20.6 | 16.2 | 18   | 7.3  |
| 29 | 682 | 26.5 | 27   | 27.2 | 28.7 | 32.5 | 33.2 | 33.9 | 35.4 | 20.6 | 16.2 | 18.7 | 8.9  |
| 29 | 683 | 26.3 | 26.8 | 26.3 | 28.2 | 32   | 32.5 | 33   | 34.1 | 20.7 | 16.2 | 20.5 | 12.9 |
| 29 | 684 | 25.8 | 26.1 | 26   | 26.9 | 31.5 | 31.8 | 32.1 | 32.7 | 21.1 | 17.3 | 23.2 | 19.2 |
| 29 | 685 | 25.6 | 25.8 | 25.4 | 26.3 | 31   | 31.1 | 31.2 | 31.4 | 22.6 | 20.7 | 26.6 | 26.8 |
| 29 | 686 | 25.3 | 25.4 | 25.1 | 25.5 | 31   | 31.1 | 31.2 | 31.4 | 24.2 | 24.5 | 29.8 | 34.3 |
| 29 | 687 | 25.1 | 25.1 | 24.5 | 25   | 30.5 | 30.4 | 30.3 | 30.1 | 25.9 | 28.3 | 32.5 | 40.6 |
| 29 | 688 | 24.8 | 24.7 | 24.5 | 24.2 | 30   | 29.7 | 29.4 | 28.8 | 27.4 | 31.6 | 34.4 | 44.9 |
| 29 | 689 | 24.8 | 24.7 | 24   | 24.2 | 29.5 | 29   | 28.5 | 27.4 | 28.4 | 34.1 | 35.5 | 47.4 |
| 29 | 690 | 24.5 | 24.2 | 23.8 | 23.4 | 29.5 | 29   | 28.5 | 27.4 | 29.2 | 35.8 | 35.9 | 48.4 |
| 29 | 691 | 24.4 | 24.1 | 23.6 | 23.1 | 29   | 28.3 | 27.6 | 26.1 | 29.4 | 36.4 | 35.5 | 47.5 |
| 29 | 692 | 24.3 | 24   | 23.3 | 22.9 | 28.5 | 27.6 | 26.7 | 24.8 | 28.7 | 34.6 | 34.3 | 44.7 |
| 29 | 693 | 24.1 | 23.7 | 23.1 | 22.4 | 28.5 | 27.6 | 26.7 | 24.8 | 27.7 | 32.3 | 32.5 | 40.6 |
| 29 | 694 | 24   | 23.5 | 22.9 | 22.1 | 28   | 26.9 | 25.8 | 23.4 | 26.5 | 29.8 | 30.8 | 36.6 |
| 29 | 695 | 23.9 | 23.4 | 23.3 | 21.8 | 28   | 26.9 | 25.8 | 23.4 | 24.5 | 25   | 29.2 | 32.9 |
| 29 | 696 | 24.1 | 23.7 | 23.2 | 22.4 | 28.5 | 27.6 | 26.7 | 24.8 | 23.9 | 23.7 | 27.9 | 29.9 |
| 30 | 697 | 24.5 | 23.8 | 24.6 | 21.7 | 29.5 | 28.7 | 27.8 | 26   | 23.3 | 22.7 | 26.7 | 25   |
| 30 | 698 | 25.3 | 24.9 | 26   | 23.8 | 30.5 | 30.1 | 29.6 | 28.7 | 22.8 | 21.6 | 25.6 | 22.4 |
| 30 | 699 | 26.1 | 26.1 | 27.7 | 26   | 31.5 | 31.5 | 31.4 | 31.3 | 22.4 | 20.5 | 24.5 | 19.9 |
| 30 | 700 | 27   | 27.3 | 29.5 | 28.3 | 33   | 33.6 | 34.1 | 35.3 | 22   | 19.7 | 23.5 | 17.6 |
| 30 | 701 | 28   | 28.7 | 30.4 | 31   | 34   | 35   | 35.9 | 38   | 21.7 | 19   | 22.6 | 15.6 |
| 30 | 702 | 28.5 | 29.4 | 30.9 | 32.3 | 34.5 | 35.7 | 36.8 | 39.3 | 21.5 | 18.4 | 21.8 | 13.8 |
| 30 | 703 | 28.8 | 29.8 | 30.7 | 33.1 | 34   | 35   | 35.9 | 38   | 21.2 | 17.9 | 21.1 | 12   |
| 30 | 704 | 28.7 | 29.7 | 30   | 32.9 | 34   | 35   | 35.9 | 38   | 21.1 | 17.6 | 20.4 | 10.5 |
| 30 | 705 | 28.3 | 29.1 | 29.1 | 31.8 | 33.5 | 34.3 | 35   | 36.6 | 20.9 | 17.1 | 20   | 9.6  |
| 30 | 706 | 27.8 | 28.4 | 28.6 | 30.5 | 33   | 33.6 | 34.1 | 35.3 | 20.7 | 16.7 | 20.4 | 10.5 |
| 30 | 707 | 27.5 | 28   | 27.8 | 29.7 | 33   | 33.6 | 34.1 | 35.3 | 20.5 | 16.2 | 21.8 | 13.8 |
| 30 | 708 | 27.1 | 27.5 | 27.3 | 28.6 | 32.5 | 32.9 | 33.2 | 34   | 20.8 | 16.9 | 24.3 | 19.5 |

|    |     |      |      |      |      |      |      |      |      |      |      |      |      |
|----|-----|------|------|------|------|------|------|------|------|------|------|------|------|
| 30 | 709 | 26.8 | 27   | 26.4 | 27.8 | 32   | 32.2 | 32.3 | 32.7 | 22.1 | 20   | 27.4 | 26.6 |
| 30 | 710 | 26.3 | 26.3 | 25.7 | 26.5 | 31.5 | 31.5 | 31.4 | 31.3 | 23.5 | 23.1 | 30.4 | 33.6 |
| 30 | 711 | 25.9 | 25.8 | 25.1 | 25.4 | 31.5 | 31.5 | 31.4 | 31.3 | 24.6 | 25.7 | 33.2 | 39.9 |
| 30 | 712 | 25.6 | 25.4 | 24.6 | 24.6 | 31   | 30.8 | 30.5 | 30   | 25.9 | 28.6 | 35.2 | 44.5 |
| 30 | 713 | 25.3 | 24.9 | 23.9 | 23.8 | 30.5 | 30.1 | 29.6 | 28.7 | 27   | 31.1 | 36.4 | 47.4 |
| 30 | 714 | 24.9 | 24.4 | 23.7 | 22.8 | 30.5 | 30.1 | 29.6 | 28.7 | 27.7 | 32.7 | 36.9 | 48.5 |
| 30 | 715 | 24.8 | 24.2 | 23   | 22.5 | 30   | 29.4 | 28.7 | 27.3 | 27.9 | 33.2 | 36.7 | 48.1 |
| 30 | 716 | 24.4 | 23.7 | 22.8 | 21.4 | 30   | 29.4 | 28.7 | 27.3 | 27.8 | 33   | 35.7 | 45.8 |
| 30 | 717 | 24.3 | 23.5 | 22.1 | 21.2 | 29.5 | 28.7 | 27.8 | 26   | 27.3 | 31.9 | 34.1 | 42.1 |
| 30 | 718 | 23.9 | 23   | 22.4 | 20.1 | 29.5 | 28.7 | 27.8 | 26   | 26.7 | 30.6 | 32.5 | 38.5 |
| 30 | 719 | 24.1 | 23.3 | 23.3 | 20.6 | 29.5 | 28.7 | 27.8 | 26   | 26   | 28.9 | 31   | 34.9 |
| 30 | 720 | 24.6 | 24   | 24.1 | 22   | 30   | 29.4 | 28.7 | 27.3 | 25.2 | 27.1 | 29.6 | 31.6 |
| 31 | 721 | 25.2 | 24.6 | 25.9 | 22.8 | 30.5 | 30.1 | 29.8 | 28.9 | 24.3 | 24.4 | 28.2 | 27.5 |
| 31 | 722 | 26.2 | 26   | 27.7 | 25.5 | 31.5 | 31.5 | 31.6 | 31.6 | 23.6 | 22.7 | 27.1 | 24.9 |
| 31 | 723 | 27.2 | 27.4 | 29.8 | 28.2 | 32   | 32.2 | 32.5 | 32.9 | 23   | 21.4 | 26.1 | 22.6 |
| 31 | 724 | 28.4 | 29.1 | 31.3 | 31.4 | 33   | 33.6 | 34.3 | 35.6 | 22.5 | 20.1 | 25.2 | 20.6 |
| 31 | 725 | 29.2 | 30.2 | 31.8 | 33.5 | 33   | 33.6 | 34.3 | 35.6 | 22   | 18.9 | 24.4 | 18.8 |
| 31 | 726 | 29.5 | 30.7 | 32.7 | 34.3 | 33   | 33.6 | 34.3 | 35.6 | 21.5 | 17.8 | 23.7 | 17   |
| 31 | 727 | 30   | 31.4 | 32.3 | 35.6 | 33   | 33.6 | 34.3 | 35.6 | 21.1 | 16.9 | 22.9 | 15.3 |
| 31 | 728 | 29.8 | 31.1 | 30.9 | 35.1 | 33   | 33.6 | 34.3 | 35.6 | 20.7 | 16   | 22.3 | 13.9 |
| 31 | 729 | 29   | 30   | 29.6 | 33   | 33   | 33.6 | 34.3 | 35.6 | 20.3 | 15.1 | 21.9 | 12.9 |
| 31 | 730 | 28.3 | 29   | 28.9 | 31.1 | 32.5 | 32.9 | 33.4 | 34.3 | 20.1 | 14.6 | 22.1 | 13.4 |
| 31 | 731 | 27.9 | 28.4 | 28   | 30   | 32   | 32.2 | 32.5 | 32.9 | 19.9 | 14.3 | 23.2 | 16   |
| 31 | 732 | 27.4 | 27.7 | 27.1 | 28.7 | 32   | 32.2 | 32.5 | 32.9 | 20.3 | 15.2 | 25.2 | 20.6 |
| 31 | 733 | 26.9 | 27   | 26.2 | 27.4 | 31.5 | 31.5 | 31.6 | 31.6 | 21.4 | 17.7 | 28   | 27   |
| 31 | 734 | 26.4 | 26.3 | 25.5 | 26   | 31.5 | 31.5 | 31.6 | 31.6 | 22.3 | 19.8 | 30.9 | 33.6 |
| 31 | 735 | 26   | 25.8 | 25.1 | 25   | 31   | 30.8 | 30.7 | 30.3 | 24   | 23.6 | 32.7 | 37.9 |
| 31 | 736 | 25.8 | 25.5 | 24.4 | 24.4 | 31   | 30.8 | 30.7 | 30.3 | 25.8 | 27.7 | 34.2 | 41.3 |
| 31 | 737 | 25.4 | 24.9 | 23.7 | 23.4 | 30.5 | 30.1 | 29.8 | 28.9 | 27.4 | 31.5 | 35.2 | 43.5 |
| 31 | 738 | 25   | 24.4 | 23.2 | 22.3 | 30.5 | 30.1 | 29.8 | 28.9 | 28.9 | 34.8 | 36.1 | 45.6 |
| 31 | 739 | 24.7 | 23.9 | 22.6 | 21.5 | 30.5 | 30.1 | 29.8 | 28.9 | 29.6 | 36.6 | 36.3 | 46.1 |
| 31 | 740 | 24.4 | 23.5 | 21.9 | 20.7 | 30   | 29.4 | 28.9 | 27.6 | 29.9 | 37.1 | 35.4 | 43.9 |
| 31 | 741 | 24   | 23   | 21.7 | 19.7 | 30   | 29.4 | 28.9 | 27.6 | 29.6 | 36.5 | 34.3 | 41.5 |
| 31 | 742 | 23.9 | 22.8 | 21.7 | 19.4 | 30   | 29.4 | 28.9 | 27.6 | 28.9 | 34.9 | 33   | 38.6 |
| 31 | 743 | 23.9 | 22.8 | 22.4 | 19.4 | 29.5 | 28.7 | 28   | 26.3 | 28   | 32.9 | 31.7 | 35.6 |
| 31 | 744 | 24.3 | 23.4 | 23.3 | 20.5 | 30   | 29.4 | 28.9 | 27.6 | 27.1 | 30.8 | 30.4 | 32.6 |
| 32 | 745 | 25   | 24.1 | 25.2 | 21.4 | 30.5 | 31.2 | 31.9 | 33.4 | 26.3 | 26.1 | 29.3 | 28.3 |
| 32 | 746 | 26.1 | 25.7 | 27.6 | 24.3 | 31   | 31.9 | 32.8 | 34.8 | 25.6 | 24.5 | 28.3 | 26   |
| 32 | 747 | 27.4 | 27.5 | 29.9 | 27.8 | 31   | 31.9 | 32.8 | 34.8 | 25   | 23.2 | 27.4 | 23.8 |
| 32 | 748 | 28.7 | 29.3 | 31.2 | 31.2 | 31   | 31.9 | 32.8 | 34.8 | 24.5 | 21.9 | 26.6 | 22   |
| 32 | 749 | 29.4 | 30.3 | 31.4 | 33.1 | 30.5 | 31.2 | 31.9 | 33.4 | 24   | 20.9 | 25.8 | 20.2 |
| 32 | 750 | 29.5 | 30.4 | 31.5 | 33.4 | 30.5 | 31.2 | 31.9 | 33.4 | 23.6 | 19.9 | 25.2 | 18.9 |
| 32 | 751 | 29.6 | 30.6 | 31.9 | 33.6 | 30   | 30.5 | 31   | 32.1 | 23.2 | 19   | 24.8 | 17.9 |
| 32 | 752 | 29.8 | 30.9 | 31   | 34.2 | 30.5 | 31.2 | 31.9 | 33.4 | 22.9 | 18.3 | 24.6 | 17.4 |
| 32 | 753 | 29.3 | 30.2 | 30.1 | 32.8 | 30.5 | 31.2 | 31.9 | 33.4 | 22.6 | 17.6 | 24.5 | 17.2 |
| 32 | 754 | 28.8 | 29.5 | 29.2 | 31.5 | 30   | 30.5 | 31   | 32.1 | 22.4 | 17.1 | 24.8 | 17.9 |
| 32 | 755 | 28.3 | 28.8 | 28.8 | 30.2 | 30   | 30.5 | 31   | 32.1 | 22.2 | 16.7 | 25.7 | 20.1 |
| 32 | 756 | 28.1 | 28.5 | 27.9 | 29.6 | 29.5 | 29.8 | 30.1 | 30.8 | 22.4 | 17.2 | 27.4 | 23.8 |
| 32 | 757 | 27.6 | 27.8 | 27.4 | 28.3 | 29   | 29.1 | 29.2 | 29.4 | 23.6 | 19.8 | 29.5 | 28.7 |
| 32 | 758 | 27.3 | 27.4 | 26.7 | 27.5 | 28.5 | 28.4 | 28.3 | 28.1 | 25.3 | 23.8 | 31.9 | 34.3 |
| 32 | 759 | 26.9 | 26.8 | 25.8 | 26.5 | 28   | 27.7 | 27.4 | 26.8 | 27.2 | 28.2 | 33.8 | 38.6 |
| 32 | 760 | 26.4 | 26.1 | 25.6 | 25.1 | 27.5 | 27   | 26.5 | 25.5 | 29   | 32.3 | 34.9 | 41.1 |
| 32 | 761 | 26.3 | 26   | 24.9 | 24.9 | 27.5 | 27   | 26.5 | 25.5 | 30.5 | 35.8 | 35.8 | 43.2 |
| 32 | 762 | 25.9 | 25.4 | 24.7 | 23.8 | 27   | 26.3 | 25.6 | 24.1 | 31.5 | 38   | 36.4 | 44.6 |
| 32 | 763 | 25.8 | 25.3 | 24   | 23.5 | 26.5 | 25.6 | 24.7 | 22.8 | 31.6 | 38.3 | 36.6 | 45.1 |
| 32 | 764 | 25.4 | 24.7 | 23.3 | 22.5 | 26.5 | 25.6 | 24.7 | 22.8 | 31.7 | 38.5 | 36   | 43.8 |
| 32 | 765 | 25   | 24.1 | 23.1 | 21.4 | 26   | 24.9 | 23.8 | 21.5 | 31.3 | 37.6 | 35   | 41.3 |
| 32 | 766 | 24.9 | 24   | 23.4 | 21.1 | 25.5 | 24.2 | 22.9 | 20.1 | 30.3 | 35.3 | 33.7 | 38.5 |
| 32 | 767 | 25.1 | 24.3 | 24.2 | 21.7 | 26   | 24.9 | 23.8 | 21.5 | 29.3 | 33   | 32.5 | 35.7 |
| 32 | 768 | 25.5 | 24.8 | 24.7 | 22.7 | 26.5 | 25.6 | 24.7 | 22.8 | 28.3 | 30.8 | 31.5 | 33.5 |
| 33 | 769 | 26.2 | 25.4 | 26.3 | 23   | 27.5 | 27   | 26.5 | 25.3 | 27.5 | 30.6 | 30.6 | 30.2 |
| 33 | 770 | 27.1 | 26.7 | 28.6 | 25.4 | 28.5 | 28.4 | 28.3 | 28   | 26.7 | 28.9 | 29.9 | 28.5 |
| 33 | 771 | 28.4 | 28.5 | 30.4 | 28.8 | 29.5 | 29.8 | 30.1 | 30.6 | 26   | 27.2 | 29.2 | 26.9 |
| 33 | 772 | 29.4 | 29.9 | 32.2 | 31.5 | 31   | 31.9 | 32.8 | 34.6 | 25.3 | 25.7 | 28.6 | 25.5 |
| 33 | 773 | 30.4 | 31.3 | 33.8 | 34.2 | 31.5 | 32.6 | 33.7 | 36   | 24.8 | 24.4 | 28.1 | 24.3 |

|    |     |      |      |      |      |      |      |      |      |      |      |      |      |
|----|-----|------|------|------|------|------|------|------|------|------|------|------|------|
| 33 | 774 | 31.3 | 32.6 | 34.2 | 36.6 | 32   | 33.3 | 34.6 | 37.3 | 24.2 | 23.1 | 27.1 | 22   |
| 33 | 775 | 31.5 | 32.8 | 33.8 | 37.1 | 32   | 33.3 | 34.6 | 37.3 | 23.5 | 21.6 | 26.3 | 20.3 |
| 33 | 776 | 31.3 | 32.6 | 32.8 | 36.6 | 31.5 | 32.6 | 33.7 | 36   | 23   | 20.4 | 25.8 | 19.1 |
| 33 | 777 | 30.7 | 31.7 | 31.5 | 35   | 31   | 31.9 | 32.8 | 34.6 | 22.7 | 19.6 | 25.7 | 18.8 |
| 33 | 778 | 30   | 30.7 | 30.4 | 33.1 | 30.5 | 31.2 | 31.9 | 33.3 | 22.5 | 19.1 | 26   | 19.6 |
| 33 | 779 | 29.4 | 29.9 | 29.7 | 31.5 | 30   | 30.5 | 31   | 32   | 22.5 | 19.2 | 27.1 | 22.2 |
| 33 | 780 | 29   | 29.3 | 28.6 | 30.4 | 29.5 | 29.8 | 30.1 | 30.6 | 22.6 | 19.4 | 29   | 26.5 |
| 33 | 781 | 28.4 | 28.5 | 27.9 | 28.8 | 29   | 29.1 | 29.2 | 29.3 | 22.8 | 20   | 31.2 | 31.5 |
| 33 | 782 | 28   | 27.9 | 27.5 | 27.8 | 29   | 29.1 | 29.2 | 29.3 | 23.1 | 20.6 | 33.5 | 36.9 |
| 33 | 783 | 27.8 | 27.7 | 26.8 | 27.3 | 28.5 | 28.4 | 28.3 | 28   | 23.5 | 21.5 | 35.5 | 41.4 |
| 33 | 784 | 27.4 | 27.1 | 25.9 | 26.2 | 28   | 27.7 | 27.4 | 26.7 | 25.1 | 25.2 | 36.5 | 43.7 |
| 33 | 785 | 26.9 | 26.4 | 25.7 | 24.9 | 27.5 | 27   | 26.5 | 25.3 | 26.5 | 28.3 | 37   | 44.8 |
| 33 | 786 | 26.8 | 26.3 | 25   | 24.6 | 27   | 26.3 | 25.6 | 24   | 27.3 | 30.3 | 37.3 | 45.5 |
| 33 | 787 | 26.4 | 25.7 | 24.1 | 23.5 | 27   | 26.3 | 25.6 | 24   | 28.1 | 32   | 36.8 | 44.4 |
| 33 | 788 | 25.9 | 25   | 23.9 | 22.2 | 26.5 | 25.6 | 24.7 | 22.7 | 27.9 | 31.7 | 35.4 | 41.1 |
| 33 | 789 | 25.8 | 24.9 | 23.2 | 21.9 | 26   | 24.9 | 23.8 | 21.3 | 27.6 | 30.9 | 33.8 | 37.5 |
| 33 | 790 | 25.4 | 24.3 | 23.6 | 20.9 | 26   | 24.9 | 23.8 | 21.3 | 27   | 29.6 | 32.3 | 34.1 |
| 33 | 791 | 25.6 | 24.6 | 24.3 | 21.4 | 26   | 24.9 | 23.8 | 21.3 | 26.3 | 27.9 | 30.7 | 30.5 |
| 33 | 792 | 26   | 25.1 | 25.4 | 22.5 | 26.5 | 25.6 | 24.7 | 22.7 | 25.5 | 26   | 29.3 | 27.2 |
| 34 | 793 | 26.8 | 26.1 | 27.1 | 24   | 28   | 27   | 26   | 23.8 | 24.8 | 23.9 | 28.1 | 27   |
| 34 | 794 | 27.7 | 27.4 | 29.2 | 26.4 | 29   | 28.4 | 27.8 | 26.5 | 24.1 | 22.4 | 26.9 | 24.3 |
| 34 | 795 | 28.9 | 29.1 | 31.2 | 29.6 | 30.5 | 30.5 | 30.5 | 30.5 | 23.6 | 21.1 | 25.9 | 22   |
| 34 | 796 | 30   | 30.6 | 33.2 | 32.5 | 32   | 32.6 | 33.2 | 34.5 | 23.1 | 19.9 | 24.9 | 19.8 |
| 34 | 797 | 31.1 | 32.1 | 34.4 | 35.4 | 33   | 34   | 35   | 37.1 | 22.6 | 18.9 | 24.1 | 17.9 |
| 34 | 798 | 31.8 | 33.1 | 34.8 | 37.3 | 33.5 | 34.7 | 35.9 | 38.4 | 22.2 | 17.9 | 23.3 | 16.1 |
| 34 | 799 | 32   | 33.4 | 34.4 | 37.8 | 33.5 | 34.7 | 35.9 | 38.4 | 21.8 | 17   | 22.6 | 14.5 |
| 34 | 800 | 31.8 | 33.1 | 33   | 37.3 | 33.5 | 34.7 | 35.9 | 38.4 | 21.3 | 16   | 22.1 | 13.2 |
| 34 | 801 | 31   | 32   | 31.7 | 35.1 | 33   | 34   | 35   | 37.1 | 21   | 15.1 | 21.7 | 12.5 |
| 34 | 802 | 30.3 | 31   | 30.8 | 33.3 | 32.5 | 33.3 | 34.1 | 35.8 | 20.7 | 14.4 | 22.1 | 13.3 |
| 34 | 803 | 29.8 | 30.3 | 29.9 | 31.9 | 32   | 32.6 | 33.2 | 34.5 | 20.5 | 13.9 | 23.2 | 15.9 |
| 34 | 804 | 29.3 | 29.6 | 29   | 30.6 | 31.5 | 31.9 | 32.3 | 33.1 | 20.7 | 14.5 | 25.1 | 20.2 |
| 34 | 805 | 28.8 | 28.9 | 28.1 | 29.3 | 31   | 31.2 | 31.4 | 31.8 | 22.3 | 18.2 | 27.7 | 26.3 |
| 34 | 806 | 28.3 | 28.2 | 27.4 | 28   | 30.5 | 30.5 | 30.5 | 30.5 | 24.4 | 22.9 | 30.7 | 33   |
| 34 | 807 | 27.9 | 27.7 | 26.5 | 26.9 | 30   | 29.8 | 29.6 | 29.1 | 26.5 | 27.8 | 33.4 | 39.3 |
| 34 | 808 | 27.4 | 27   | 26.3 | 25.6 | 30   | 29.8 | 29.6 | 29.1 | 28.4 | 32.1 | 35.5 | 44.1 |
| 34 | 809 | 27.3 | 26.8 | 25.6 | 25.3 | 29.5 | 29.1 | 28.7 | 27.8 | 29.9 | 35.6 | 36.6 | 46.7 |
| 34 | 810 | 26.9 | 26.3 | 24.9 | 24.2 | 29   | 28.4 | 27.8 | 26.5 | 31   | 38.2 | 37.1 | 47.8 |
| 34 | 811 | 26.5 | 25.7 | 24.7 | 23.2 | 29   | 28.4 | 27.8 | 26.5 | 31.6 | 39.5 | 36.8 | 47.1 |
| 34 | 812 | 26.4 | 25.6 | 23.8 | 22.9 | 28.5 | 27.7 | 26.9 | 25.1 | 31.6 | 39.6 | 35.8 | 44.8 |
| 34 | 813 | 25.9 | 24.9 | 23.8 | 21.6 | 28.5 | 27.7 | 26.9 | 25.1 | 31   | 38.2 | 34.4 | 41.6 |
| 34 | 814 | 25.9 | 24.9 | 24.2 | 21.6 | 28   | 27   | 26   | 23.8 | 30.2 | 36.3 | 33   | 38.3 |
| 34 | 815 | 26.1 | 25.1 | 24.5 | 22.1 | 28   | 27   | 26   | 23.8 | 29.2 | 34.1 | 31.5 | 35   |
| 34 | 816 | 26.3 | 25.4 | 26   | 22.6 | 28.5 | 27.7 | 26.9 | 25.1 | 28.2 | 31.7 | 30.4 | 32.3 |
| 35 | 817 | 27   | 26.5 | 28   | 24.9 | 29   | 28.7 | 28.3 | 27.5 | 27.2 | 27.5 | 29.3 | 27.7 |
| 35 | 818 | 28.1 | 28   | 29.6 | 27.8 | 29.5 | 29.4 | 29.2 | 28.9 | 26.4 | 25.7 | 28.3 | 25.4 |
| 35 | 819 | 29   | 29.3 | 31.4 | 30.2 | 30   | 30.1 | 30.1 | 30.2 | 25.7 | 24   | 27.4 | 23.4 |
| 35 | 820 | 30   | 30.7 | 33   | 32.8 | 30.5 | 30.8 | 31   | 31.5 | 25.1 | 22.5 | 26.6 | 21.6 |
| 35 | 821 | 30.9 | 31.9 | 34.6 | 35.2 | 30.5 | 30.8 | 31   | 31.5 | 24.5 | 21.3 | 25.9 | 19.8 |
| 35 | 822 | 31.8 | 33.2 | 35.5 | 37.6 | 31   | 31.5 | 31.9 | 32.9 | 24   | 20.1 | 25.4 | 18.7 |
| 35 | 823 | 32.3 | 33.9 | 35.5 | 39   | 31   | 31.5 | 31.9 | 32.9 | 23.5 | 19   | 25   | 17.8 |
| 35 | 824 | 32.3 | 33.9 | 32.8 | 39   | 31.5 | 32.2 | 32.8 | 34.2 | 23.1 | 18.1 | 24.7 | 17.3 |
| 35 | 825 | 30.8 | 31.8 | 31   | 35   | 31.5 | 32.2 | 32.8 | 34.2 | 22.8 | 17.3 | 24.7 | 17.3 |
| 35 | 826 | 29.8 | 30.4 | 30.1 | 32.3 | 31.5 | 32.2 | 32.8 | 34.2 | 22.5 | 16.7 | 25.1 | 18   |
| 35 | 827 | 29.3 | 29.7 | 29.2 | 31   | 31   | 31.5 | 31.9 | 32.9 | 22.3 | 16.3 | 25.9 | 20   |
| 35 | 828 | 28.8 | 29   | 28.3 | 29.7 | 31   | 31.5 | 31.9 | 32.9 | 22.6 | 16.9 | 27.8 | 24.3 |
| 35 | 829 | 28.3 | 28.3 | 27.6 | 28.3 | 30.5 | 30.8 | 31   | 31.5 | 24   | 20   | 30.5 | 30.5 |
| 35 | 830 | 27.9 | 27.7 | 26.7 | 27.3 | 30   | 30.1 | 30.1 | 30.2 | 25.8 | 24.2 | 33   | 36.4 |
| 35 | 831 | 27.4 | 27   | 26.2 | 25.9 | 30   | 30.1 | 30.1 | 30.2 | 27.6 | 28.4 | 35   | 40.9 |
| 35 | 832 | 27.1 | 26.6 | 25.8 | 25.1 | 29.5 | 29.4 | 29.2 | 28.9 | 29.3 | 32.3 | 36.1 | 43.4 |
| 35 | 833 | 26.9 | 26.3 | 24.9 | 24.6 | 29.5 | 29.4 | 29.2 | 28.9 | 30.8 | 35.7 | 37   | 45.4 |
| 35 | 834 | 26.4 | 25.6 | 24.7 | 23.3 | 29   | 28.7 | 28.3 | 27.5 | 31.9 | 38.4 | 37.5 | 46.7 |
| 35 | 835 | 26.3 | 25.5 | 24   | 23   | 29   | 28.7 | 28.3 | 27.5 | 32.5 | 39.7 | 37.1 | 45.7 |
| 35 | 836 | 25.9 | 24.9 | 23.8 | 21.9 | 28.5 | 28   | 27.4 | 26.2 | 32.6 | 40   | 36.1 | 43.4 |
| 35 | 837 | 25.8 | 24.8 | 23.1 | 21.7 | 28.5 | 28   | 27.4 | 26.2 | 32.2 | 39   | 35   | 40.9 |
| 35 | 838 | 25.4 | 24.2 | 23.5 | 20.6 | 28   | 27.3 | 26.5 | 24.9 | 31.3 | 36.8 | 33.9 | 38.4 |



|    |     |      |      |      |      |      |      |      |      |      |      |      |      |
|----|-----|------|------|------|------|------|------|------|------|------|------|------|------|
| 35 | 839 | 25.6 | 24.5 | 23.8 | 21.1 | 28   | 27.3 | 26.5 | 24.9 | 30.3 | 34.6 | 32.8 | 35.8 |
| 35 | 840 | 25.8 | 24.8 | 26.5 | 21.7 | 28.5 | 28   | 27.4 | 26.2 | 29.4 | 32.4 | 31.7 | 33.3 |
| 36 | 841 | 26.3 | 26.4 | 27.5 | 26.6 | 29.5 | 28.8 | 28   | 26.4 | 28.6 | 29.9 | 30.8 | 29   |
| 36 | 842 | 26.9 | 27.2 | 29.2 | 28.2 | 30.5 | 30.2 | 29.8 | 29   | 27.9 | 28.5 | 30.1 | 27.3 |
| 36 | 843 | 27.8 | 28.5 | 30.1 | 30.6 | 31.5 | 31.6 | 31.6 | 31.7 | 27.4 | 27.3 | 29.4 | 25.8 |
| 36 | 844 | 28.3 | 29.2 | 30.2 | 31.9 | 32   | 32.3 | 32.5 | 33   | 27   | 26.3 | 28.9 | 24.5 |
| 36 | 845 | 28.4 | 29.3 | 30.1 | 32.2 | 33   | 33.7 | 34.3 | 35.7 | 26.6 | 25.3 | 28.4 | 23.4 |
| 36 | 846 | 28.3 | 29.2 | 30.1 | 31.9 | 33.5 | 34.4 | 35.2 | 37   | 26.1 | 24.3 | 28   | 22.5 |
| 36 | 847 | 28.3 | 29.2 | 30.2 | 31.9 | 33.5 | 34.4 | 35.2 | 37   | 25.6 | 23.1 | 27.6 | 21.7 |
| 36 | 848 | 28.4 | 29.3 | 30.1 | 32.2 | 33.5 | 34.4 | 35.2 | 37   | 25.1 | 22   | 27.4 | 21.1 |
| 36 | 849 | 28.3 | 29.2 | 29.5 | 31.9 | 33.5 | 34.4 | 35.2 | 37   | 24.7 | 20.9 | 27.3 | 20.9 |
| 36 | 850 | 28   | 28.8 | 28.6 | 31.1 | 33   | 33.7 | 34.3 | 35.7 | 24.3 | 20.1 | 27.5 | 21.4 |
| 36 | 851 | 27.5 | 28.1 | 27.5 | 29.8 | 33   | 33.7 | 34.3 | 35.7 | 24.1 | 19.6 | 28.3 | 23.2 |
| 36 | 852 | 26.9 | 27.2 | 26.8 | 28.2 | 32.5 | 33   | 33.4 | 34.4 | 24.2 | 20   | 29.9 | 26.8 |
| 36 | 853 | 26.5 | 26.7 | 26.1 | 27.2 | 32   | 32.3 | 32.5 | 33   | 25.4 | 22.6 | 32.3 | 32.4 |
| 36 | 854 | 26.1 | 26.1 | 25.6 | 26.1 | 32   | 32.3 | 32.5 | 33   | 25.9 | 23.8 | 35   | 38.6 |
| 36 | 855 | 25.8 | 25.7 | 24.7 | 25.3 | 31.5 | 31.6 | 31.6 | 31.7 | 27   | 26.2 | 36.6 | 42.3 |
| 36 | 856 | 25.3 | 25   | 23.9 | 24   | 31   | 30.9 | 30.7 | 30.4 | 28.6 | 29.9 | 37.8 | 45.1 |
| 36 | 857 | 24.9 | 24.4 | 23   | 22.9 | 30.5 | 30.2 | 29.8 | 29   | 30.2 | 33.6 | 38.3 | 46.3 |
| 36 | 858 | 24.4 | 23.7 | 22.3 | 21.6 | 30.5 | 30.2 | 29.8 | 29   | 31.3 | 36.3 | 38.2 | 45.9 |
| 36 | 859 | 24   | 23.2 | 21.6 | 20.5 | 30   | 29.5 | 28.9 | 27.7 | 31.7 | 37.1 | 37.7 | 44.9 |
| 36 | 860 | 23.6 | 22.6 | 21.1 | 19.4 | 29.5 | 28.8 | 28   | 26.4 | 31.8 | 37.3 | 37   | 43.2 |
| 36 | 861 | 23.3 | 22.2 | 20.5 | 18.6 | 29.5 | 28.8 | 28   | 26.4 | 30.8 | 35   | 35.9 | 40.8 |
| 36 | 862 | 23   | 21.8 | 20.3 | 17.8 | 29   | 28.1 | 27.1 | 25.1 | 29.9 | 32.9 | 34.7 | 38   |
| 36 | 863 | 22.9 | 21.6 | 21.1 | 17.6 | 29   | 28.1 | 27.1 | 25.1 | 29   | 30.9 | 33.4 | 35   |
| 36 | 864 | 23.3 | 22.2 | 23.2 | 18.6 | 29.5 | 28.8 | 28   | 26.4 | 28.1 | 28.8 | 32.2 | 32.3 |
| 37 | 865 | 24   | 23.6 | 24.8 | 22.2 | 30   | 29.4 | 28.8 | 27.4 | 27.2 | 28   | 31.2 | 30.6 |
| 37 | 866 | 24.9 | 24.8 | 26.4 | 24.6 | 31   | 30.8 | 30.6 | 30.1 | 26.4 | 26.2 | 30.2 | 28.5 |
| 37 | 867 | 25.8 | 26.1 | 28.2 | 27   | 32   | 32.2 | 32.4 | 32.8 | 25.7 | 24.6 | 29.4 | 26.4 |
| 37 | 868 | 26.8 | 27.5 | 29.5 | 29.7 | 33   | 33.6 | 34.2 | 35.4 | 25.1 | 23.2 | 28.5 | 24.4 |
| 37 | 869 | 27.5 | 28.5 | 30   | 31.5 | 34   | 35   | 36   | 38.1 | 24.5 | 21.8 | 27.7 | 22.7 |
| 37 | 870 | 27.8 | 28.9 | 30.2 | 32.3 | 34.5 | 35.7 | 36.9 | 39.4 | 24   | 20.6 | 27.1 | 21.1 |
| 37 | 871 | 27.9 | 29   | 30.2 | 32.6 | 34   | 35   | 36   | 38.1 | 23.5 | 19.4 | 26.6 | 20   |
| 37 | 872 | 27.9 | 29   | 29.1 | 32.6 | 33.5 | 34.3 | 35.1 | 36.8 | 23   | 18.4 | 26.2 | 19.1 |
| 37 | 873 | 27.3 | 28.2 | 28.2 | 31   | 33   | 33.6 | 34.2 | 35.4 | 22.6 | 17.4 | 25.8 | 18.3 |
| 37 | 874 | 26.8 | 27.5 | 27.3 | 29.7 | 33   | 33.6 | 34.2 | 35.4 | 22.3 | 16.6 | 25.9 | 18.4 |
| 37 | 875 | 26.3 | 26.8 | 26.6 | 28.4 | 32.5 | 32.9 | 33.3 | 34.1 | 22   | 16.1 | 26.6 | 20.1 |
| 37 | 876 | 25.9 | 26.2 | 25.7 | 27.3 | 32.5 | 32.9 | 33.3 | 34.1 | 22.2 | 16.4 | 28.2 | 23.9 |
| 37 | 877 | 25.4 | 25.5 | 24.8 | 26   | 32   | 32.2 | 32.4 | 32.8 | 23.4 | 19.3 | 30.7 | 29.6 |
| 37 | 878 | 24.9 | 24.8 | 24.1 | 24.6 | 31.5 | 31.5 | 31.5 | 31.4 | 25.2 | 23.3 | 33.3 | 35.5 |
| 37 | 879 | 24.5 | 24.3 | 23.7 | 23.6 | 31   | 30.8 | 30.6 | 30.1 | 27   | 27.4 | 35.7 | 41.1 |
| 37 | 880 | 24.3 | 24   | 23   | 23   | 31   | 30.8 | 30.6 | 30.1 | 28.7 | 31.4 | 37.5 | 45.1 |
| 37 | 881 | 23.9 | 23.4 | 22.3 | 22   | 30.5 | 30.1 | 29.7 | 28.8 | 30.1 | 34.7 | 38.6 | 47.7 |
| 37 | 882 | 23.5 | 22.9 | 21.9 | 20.9 | 30   | 29.4 | 28.8 | 27.4 | 31.2 | 37.2 | 38.8 | 48.3 |
| 37 | 883 | 23.3 | 22.6 | 21   | 20.4 | 30   | 29.4 | 28.8 | 27.4 | 31.9 | 38.7 | 38.2 | 46.7 |
| 37 | 884 | 22.8 | 21.9 | 20.5 | 19   | 30   | 29.4 | 28.8 | 27.4 | 31.8 | 38.6 | 37.2 | 44.4 |
| 37 | 885 | 22.5 | 21.5 | 20.1 | 18.2 | 29.5 | 28.7 | 27.9 | 26.1 | 31.3 | 37.5 | 35.8 | 41.2 |
| 37 | 886 | 22.3 | 21.2 | 20.3 | 17.7 | 29.5 | 28.7 | 27.9 | 26.1 | 30.6 | 35.9 | 34.5 | 38.2 |
| 37 | 887 | 22.4 | 21.3 | 21   | 18   | 29.5 | 28.7 | 27.9 | 26.1 | 29.8 | 33.9 | 33.1 | 35.1 |
| 37 | 888 | 22.8 | 21.9 | 21.6 | 19   | 29.5 | 28.7 | 27.9 | 26.1 | 28.8 | 31.7 | 31.9 | 32.2 |
| 38 | 889 | 23.5 | 22.5 | 23.9 | 19.5 | 30   | 29.9 | 29.8 | 29.6 | 27.9 | 28.3 | 30.7 | 30.7 |
| 38 | 890 | 24.8 | 24.4 | 26.1 | 23   | 30.5 | 30.6 | 30.7 | 30.9 | 27.2 | 26.5 | 29.7 | 28.4 |
| 38 | 891 | 26   | 26   | 28.6 | 26.1 | 31   | 31.3 | 31.6 | 32.2 | 26.5 | 24.9 | 28.9 | 26.4 |
| 38 | 892 | 27.4 | 28   | 30.4 | 29.9 | 31   | 31.3 | 31.6 | 32.2 | 25.9 | 23.5 | 28.1 | 24.6 |
| 38 | 893 | 28.4 | 29.4 | 32   | 32.5 | 31   | 31.3 | 31.6 | 32.2 | 25.3 | 22.2 | 27.4 | 23.1 |
| 38 | 894 | 29.3 | 30.7 | 32.7 | 34.9 | 31.5 | 32   | 32.5 | 33.5 | 24.8 | 21.1 | 26.9 | 21.8 |
| 38 | 895 | 29.7 | 31.2 | 32   | 36   | 31.5 | 32   | 32.5 | 33.5 | 24.4 | 20.1 | 26.3 | 20.5 |
| 38 | 896 | 29.3 | 30.7 | 30.6 | 34.9 | 31   | 31.3 | 31.6 | 32.2 | 24   | 19.1 | 25.8 | 19.3 |
| 38 | 897 | 28.5 | 29.5 | 29.5 | 32.8 | 31   | 31.3 | 31.6 | 32.2 | 23.6 | 18.3 | 25.4 | 18.5 |
| 38 | 898 | 27.9 | 28.7 | 28.6 | 31.2 | 31   | 31.3 | 31.6 | 32.2 | 23.3 | 17.6 | 25.6 | 18.8 |
| 38 | 899 | 27.4 | 28   | 27.7 | 29.9 | 31   | 31.3 | 31.6 | 32.2 | 23.3 | 17.5 | 26.5 | 20.9 |
| 38 | 900 | 26.9 | 27.3 | 26.8 | 28.5 | 30.5 | 30.6 | 30.7 | 30.9 | 23.4 | 17.9 | 28.4 | 25.2 |
| 38 | 901 | 26.4 | 26.6 | 26.1 | 27.2 | 30.5 | 30.6 | 30.7 | 30.9 | 24.5 | 20.3 | 30.9 | 31.1 |
| 38 | 902 | 26   | 26   | 25.5 | 26.1 | 30   | 29.9 | 29.8 | 29.6 | 26.2 | 24.2 | 33.7 | 37.4 |
| 38 | 903 | 25.7 | 25.6 | 24.6 | 25.3 | 30   | 29.9 | 29.8 | 29.6 | 28   | 28.4 | 36   | 42.7 |

|    |     |      |      |      |      |      |      |      |      |      |      |      |      |
|----|-----|------|------|------|------|------|------|------|------|------|------|------|------|
| 38 | 904 | 25.2 | 24.9 | 24.1 | 24   | 30   | 29.9 | 29.8 | 29.6 | 29.8 | 32.4 | 37.5 | 46.2 |
| 38 | 905 | 24.9 | 24.5 | 23.2 | 23.2 | 30   | 29.9 | 29.8 | 29.6 | 31.3 | 35.9 | 38.4 | 48.3 |
| 38 | 906 | 24.4 | 23.8 | 22.5 | 21.9 | 29.5 | 29.2 | 28.9 | 28.2 | 32.4 | 38.6 | 38.2 | 47.9 |
| 38 | 907 | 24   | 23.2 | 22.1 | 20.8 | 29.5 | 29.2 | 28.9 | 28.2 | 33.1 | 40   | 37   | 45   |
| 38 | 908 | 23.8 | 23   | 21.2 | 20.3 | 29.5 | 29.2 | 28.9 | 28.2 | 33.2 | 40.4 | 35   | 40.4 |
| 38 | 909 | 23.3 | 22.3 | 20.5 | 19   | 29.5 | 29.2 | 28.9 | 28.2 | 32.8 | 39.5 | 33.2 | 36.3 |
| 38 | 910 | 22.9 | 21.7 | 20.5 | 17.9 | 29   | 28.5 | 28   | 26.9 | 32.1 | 37.8 | 31.4 | 32.3 |
| 38 | 911 | 22.9 | 21.7 | 21.2 | 17.9 | 29   | 28.5 | 28   | 26.9 | 31.2 | 35.7 | 29.7 | 28.4 |
| 38 | 912 | 23.3 | 22.3 | 22.6 | 19   | 29   | 28.5 | 28   | 26.9 | 30.2 | 33.4 | 28.2 | 24.8 |
| 39 | 913 | 23.9 | 23.2 | 24.4 | 21.1 | 29.5 | 29.3 | 29.1 | 28.7 | 29.3 | 30.1 | 26.8 | 24.6 |
| 39 | 914 | 24.9 | 24.6 | 26.5 | 23.8 | 29.5 | 29.3 | 29.1 | 28.7 | 28.5 | 28.2 | 25.6 | 21.9 |
| 39 | 915 | 26.1 | 26.3 | 28.9 | 27   | 30   | 30   | 30   | 30.1 | 27.8 | 26.6 | 24.7 | 19.9 |
| 39 | 916 | 27.4 | 28.1 | 30.7 | 30.4 | 30   | 30   | 30   | 30.1 | 27.1 | 25   | 24.1 | 18.3 |
| 39 | 917 | 28.4 | 29.5 | 32.1 | 33.1 | 30.5 | 30.7 | 30.9 | 31.4 | 26.5 | 23.6 | 23.5 | 17   |
| 39 | 918 | 29.2 | 30.6 | 33   | 35.2 | 30.5 | 30.7 | 30.9 | 31.4 | 25.9 | 22.4 | 23   | 15.9 |
| 39 | 919 | 29.7 | 31.3 | 32.3 | 36.5 | 31   | 31.4 | 31.8 | 32.7 | 25.4 | 21.2 | 22.6 | 15   |
| 39 | 920 | 29.3 | 30.8 | 31.2 | 35.5 | 31   | 31.4 | 31.8 | 32.7 | 25   | 20.2 | 22.2 | 14.1 |
| 39 | 921 | 28.7 | 29.9 | 29.6 | 33.9 | 31   | 31.4 | 31.8 | 32.7 | 24.6 | 19.2 | 22.1 | 13.7 |
| 39 | 922 | 27.8 | 28.7 | 28.5 | 31.5 | 31   | 31.4 | 31.8 | 32.7 | 24.2 | 18.4 | 22.3 | 14.3 |
| 39 | 923 | 27.2 | 27.8 | 27.1 | 29.9 | 31   | 31.4 | 31.8 | 32.7 | 24.1 | 18.1 | 22.9 | 15.6 |
| 39 | 924 | 26.4 | 26.7 | 26.2 | 27.8 | 31   | 31.4 | 31.8 | 32.7 | 24.2 | 18.4 | 24.6 | 19.4 |
| 39 | 925 | 25.9 | 26   | 25.3 | 26.4 | 31   | 31.4 | 31.8 | 32.7 | 25.4 | 21.1 | 27.5 | 26.2 |
| 39 | 926 | 25.4 | 25.3 | 24.4 | 25.1 | 30.5 | 30.7 | 30.9 | 31.4 | 27.1 | 25   | 30.7 | 33.7 |
| 39 | 927 | 24.9 | 24.6 | 23.6 | 23.8 | 30   | 30   | 30   | 30.1 | 28.9 | 29.3 | 33.7 | 40.4 |
| 39 | 928 | 24.5 | 24.1 | 22.7 | 22.7 | 30   | 30   | 30   | 30.1 | 30.6 | 33.2 | 35.3 | 44.1 |
| 39 | 929 | 24   | 23.4 | 22   | 21.4 | 29.5 | 29.3 | 29.1 | 28.7 | 32.1 | 36.6 | 36.2 | 46.3 |
| 39 | 930 | 23.6 | 22.8 | 21.5 | 20.3 | 29.5 | 29.3 | 29.1 | 28.7 | 33.3 | 39.2 | 36.9 | 47.9 |
| 39 | 931 | 23.3 | 22.4 | 20.8 | 19.5 | 29   | 28.6 | 28.2 | 27.4 | 33.9 | 40.7 | 36.8 | 47.6 |
| 39 | 932 | 22.9 | 21.8 | 20.6 | 18.5 | 29   | 28.6 | 28.2 | 27.4 | 34   | 41   | 35.7 | 45   |
| 39 | 933 | 22.8 | 21.7 | 19.9 | 18.2 | 28.5 | 27.9 | 27.3 | 26.1 | 33.7 | 40.3 | 33.9 | 41   |
| 39 | 934 | 22.4 | 21.1 | 19.9 | 17.1 | 28.5 | 27.9 | 27.3 | 26.1 | 33   | 38.6 | 32.2 | 37.1 |
| 39 | 935 | 22.4 | 21.1 | 20.6 | 17.1 | 28.5 | 27.9 | 27.3 | 26.1 | 32   | 36.4 | 30.7 | 33.7 |
| 39 | 936 | 22.8 | 21.7 | 21.7 | 18.2 | 29   | 28.6 | 28.2 | 27.4 | 31   | 34   | 29.5 | 30.8 |
| 40 | 937 | 23.5 | 22.6 | 23.7 | 19.8 | 29.5 | 28.4 | 27.4 | 25.1 | 30   | 31.3 | 28.6 | 33.5 |
| 40 | 938 | 24.6 | 24.1 | 26.2 | 22.7 | 30.5 | 29.8 | 29.2 | 27.7 | 29.2 | 29.3 | 27.9 | 31.8 |
| 40 | 939 | 26   | 26.1 | 27.3 | 26.4 | 31.5 | 31.2 | 31   | 30.4 | 28.4 | 27.6 | 27.3 | 30.5 |
| 40 | 940 | 26.6 | 26.9 | 28   | 28   | 32.5 | 32.6 | 32.8 | 33.1 | 27.8 | 26.1 | 26.7 | 29.2 |
| 40 | 941 | 27   | 27.5 | 30.2 | 29.1 | 33.5 | 34   | 34.6 | 35.7 | 27.1 | 24.6 | 26.2 | 27.9 |
| 40 | 942 | 28.2 | 29.2 | 31.4 | 32.3 | 34   | 34.7 | 35.5 | 37   | 26.6 | 23.4 | 25.3 | 25.9 |
| 40 | 943 | 28.9 | 30.2 | 31.2 | 34.1 | 34   | 34.7 | 35.5 | 37   | 26   | 22.1 | 24.4 | 23.9 |
| 40 | 944 | 28.8 | 30   | 30.5 | 33.9 | 34   | 34.7 | 35.5 | 37   | 25.5 | 20.9 | 23.7 | 22.3 |
| 40 | 945 | 28.4 | 29.5 | 29.8 | 32.8 | 34   | 34.7 | 35.5 | 37   | 25   | 19.8 | 23.4 | 21.6 |
| 40 | 946 | 28   | 28.9 | 28.7 | 31.7 | 34   | 34.7 | 35.5 | 37   | 24.6 | 18.9 | 23.4 | 21.5 |
| 40 | 947 | 27.4 | 28.1 | 27.8 | 30.1 | 33.5 | 34   | 34.6 | 35.7 | 24.4 | 18.4 | 23.2 | 21.2 |
| 40 | 948 | 26.9 | 27.4 | 26.9 | 28.8 | 33   | 33.3 | 33.7 | 34.4 | 24.4 | 18.4 | 23.4 | 21.6 |
| 40 | 949 | 26.4 | 26.7 | 26   | 27.5 | 33   | 33.3 | 33.7 | 34.4 | 25.6 | 21.2 | 23.4 | 21.6 |
| 40 | 950 | 25.9 | 26   | 25.5 | 26.1 | 32.5 | 32.6 | 32.8 | 33.1 | 27.3 | 25.1 | 23.4 | 21.6 |
| 40 | 951 | 25.6 | 25.5 | 24.9 | 25.3 | 32.5 | 32.6 | 32.8 | 33.1 | 29.2 | 29.4 | 23.6 | 22   |
| 40 | 952 | 25.3 | 25.1 | 24.2 | 24.5 | 32   | 31.9 | 31.9 | 31.7 | 31.1 | 33.7 | 24.1 | 23   |
| 40 | 953 | 24.9 | 24.6 | 23.3 | 23.5 | 31.5 | 31.2 | 31   | 30.4 | 32.6 | 37.3 | 24.4 | 23.9 |
| 40 | 954 | 24.4 | 23.9 | 22.6 | 22.2 | 31.5 | 31.2 | 31   | 30.4 | 33.9 | 40.1 | 25.5 | 26.4 |
| 40 | 955 | 24   | 23.3 | 22.2 | 21.1 | 31.5 | 31.2 | 31   | 30.4 | 34.6 | 41.7 | 26.4 | 28.5 |
| 40 | 956 | 23.8 | 23   | 21.5 | 20.6 | 31   | 30.5 | 30.1 | 29.1 | 34.7 | 42.1 | 26.2 | 27.9 |
| 40 | 957 | 23.4 | 22.5 | 21.2 | 19.5 | 31   | 30.5 | 30.1 | 29.1 | 34   | 40.5 | 25.3 | 25.9 |
| 40 | 958 | 23.2 | 22.2 | 21.3 | 19   | 30.5 | 29.8 | 29.2 | 27.7 | 32.9 | 38   | 24.2 | 23.5 |
| 40 | 959 | 23.3 | 22.3 | 21.9 | 19.2 | 30.5 | 29.8 | 29.2 | 27.7 | 31.7 | 35.1 | 23.2 | 21.2 |
| 40 | 960 | 23.6 | 22.7 | 22.4 | 20   | 30.5 | 29.8 | 29.2 | 27.7 | 30.6 | 32.6 | 22.4 | 19.2 |
| 41 | 961 | 24.3 | 23.3 | 24   | 20.3 | 31   | 30.6 | 30.2 | 29.2 | 29.7 | 30.7 | 21.6 | 20.9 |
| 41 | 962 | 25.2 | 24.6 | 26   | 22.7 | 31.5 | 31.3 | 31.1 | 30.6 | 29   | 29.1 | 21   | 19.4 |
| 41 | 963 | 26.3 | 26.1 | 28.1 | 25.6 | 32.5 | 32.7 | 32.9 | 33.2 | 28.3 | 27.6 | 20.5 | 18.3 |
| 41 | 964 | 27.5 | 27.8 | 30.5 | 28.8 | 33   | 33.4 | 33.8 | 34.6 | 27.8 | 26.3 | 20   | 17.1 |
| 41 | 965 | 28.8 | 29.6 | 32.3 | 32.3 | 34   | 34.8 | 35.6 | 37.2 | 27.3 | 25.2 | 19.6 | 16.1 |
| 41 | 966 | 29.8 | 31   | 33   | 34.9 | 34.5 | 35.5 | 36.5 | 38.5 | 26.8 | 24.1 | 19.3 | 15.5 |
| 41 | 967 | 30.2 | 31.6 | 33.2 | 36   | 34.5 | 35.5 | 36.5 | 38.5 | 26.4 | 23.1 | 19.3 | 15.5 |
| 41 | 968 | 30.3 | 31.7 | 31.6 | 36.3 | 34.5 | 35.5 | 36.5 | 38.5 | 26   | 22.2 | 19.4 | 15.7 |

|    |      |      |      |      |      |      |      |      |      |      |      |      |      |
|----|------|------|------|------|------|------|------|------|------|------|------|------|------|
| 41 | 969  | 29.4 | 30.5 | 30.5 | 33.9 | 34   | 34.8 | 35.6 | 37.2 | 25.6 | 21.3 | 19.5 | 16   |
| 41 | 970  | 28.8 | 29.6 | 29.6 | 32.3 | 34   | 34.8 | 35.6 | 37.2 | 25.3 | 20.6 | 20.1 | 17.4 |
| 41 | 971  | 28.3 | 28.9 | 28.7 | 30.9 | 33.5 | 34.1 | 34.7 | 35.9 | 25.1 | 20.2 | 21.2 | 19.9 |
| 41 | 972  | 27.8 | 28.2 | 27.8 | 29.6 | 33   | 33.4 | 33.8 | 34.6 | 25.2 | 20.3 | 21.7 | 21.2 |
| 41 | 973  | 27.3 | 27.5 | 26.9 | 28.3 | 32.5 | 32.7 | 32.9 | 33.2 | 25.6 | 21.4 | 22.9 | 23.9 |
| 41 | 974  | 26.8 | 26.8 | 26.2 | 27   | 32   | 32   | 32   | 31.9 | 26.7 | 23.9 | 24   | 26.3 |
| 41 | 975  | 26.4 | 26.3 | 25.3 | 25.9 | 32   | 32   | 32   | 31.9 | 28.5 | 27.9 | 24.7 | 28.1 |
| 41 | 976  | 25.9 | 25.6 | 24.7 | 24.6 | 31.5 | 31.3 | 31.1 | 30.6 | 30   | 31.4 | 24.7 | 27.9 |
| 41 | 977  | 25.6 | 25.2 | 24.4 | 23.8 | 31   | 30.6 | 30.2 | 29.2 | 31.5 | 34.9 | 24.9 | 28.5 |
| 41 | 978  | 25.4 | 24.9 | 23.5 | 23.2 | 31   | 30.6 | 30.2 | 29.2 | 32.5 | 37.2 | 25.7 | 30.2 |
| 41 | 979  | 24.9 | 24.2 | 23.3 | 21.9 | 30.5 | 29.9 | 29.3 | 27.9 | 33.4 | 39.1 | 25.9 | 30.6 |
| 41 | 980  | 24.8 | 24   | 22.6 | 21.6 | 30   | 29.2 | 28.4 | 26.6 | 33.7 | 40   | 25   | 28.6 |
| 41 | 981  | 24.4 | 23.5 | 22.6 | 20.6 | 30   | 29.2 | 28.4 | 26.6 | 33.6 | 39.6 | 24.1 | 26.6 |
| 41 | 982  | 24.4 | 23.5 | 21.8 | 20.6 | 29.5 | 28.5 | 27.5 | 25.2 | 32.9 | 38.1 | 23.3 | 24.7 |
| 41 | 983  | 24   | 22.9 | 22.4 | 19.5 | 29.5 | 28.5 | 27.5 | 25.2 | 32   | 36   | 22.6 | 23   |
| 41 | 984  | 24.3 | 23.3 | 24.1 | 20.3 | 30   | 29.2 | 28.4 | 26.6 | 31.1 | 33.9 | 21.7 | 21.2 |
| 42 | 985  | 24.6 | 24.3 | 24.5 | 23.6 | 30.5 | 30.3 | 30.1 | 29.7 | 30.2 | 31.3 | 21   | 15   |
| 42 | 986  | 24.8 | 24.6 | 25.5 | 24.1 | 31   | 31   | 31   | 31   | 29.5 | 29.6 | 20.2 | 13.2 |
| 42 | 987  | 25.4 | 25.5 | 27.2 | 25.7 | 32   | 32.4 | 32.8 | 33.7 | 28.8 | 28   | 19.7 | 12.1 |
| 42 | 988  | 26.3 | 26.7 | 29.3 | 28.1 | 32.5 | 33.1 | 33.7 | 35   | 28.1 | 26.4 | 19.1 | 10.6 |
| 42 | 989  | 27.5 | 28.4 | 31.1 | 31.3 | 33   | 33.8 | 34.6 | 36.4 | 27.5 | 25   | 18.5 | 9.4  |
| 42 | 990  | 28.5 | 29.8 | 32.6 | 33.9 | 33.5 | 34.5 | 35.5 | 37.7 | 26.9 | 23.8 | 18   | 8.1  |
| 42 | 991  | 29.3 | 30.9 | 32.6 | 36.1 | 33.5 | 34.5 | 35.5 | 37.7 | 26.4 | 22.6 | 17.5 | 6.9  |
| 42 | 992  | 29.3 | 30.9 | 31.8 | 36.1 | 33   | 33.8 | 34.6 | 36.4 | 25.9 | 21.5 | 17.1 | 6    |
| 42 | 993  | 28.9 | 30.4 | 30.8 | 35   | 33   | 33.8 | 34.6 | 36.4 | 25.5 | 20.4 | 17   | 5.8  |
| 42 | 994  | 28.3 | 29.5 | 29.9 | 33.4 | 32.5 | 33.1 | 33.7 | 35   | 25.1 | 19.5 | 18   | 8.1  |
| 42 | 995  | 27.8 | 28.8 | 17.8 | 32.1 | 32   | 32.4 | 32.8 | 33.7 | 24.8 | 19   | 20.1 | 13   |
| 42 | 996  | 21.1 | 19.4 | 21.8 | 14.2 | 31.5 | 31.7 | 31.9 | 32.4 | 24.8 | 18.8 | 23.3 | 20.3 |
| 42 | 997  | 23.3 | 22.5 | 22.8 | 20.1 | 31.5 | 31.7 | 31.9 | 32.4 | 25.8 | 21.2 | 27   | 28.8 |
| 42 | 998  | 23.9 | 23.4 | 22.8 | 21.7 | 31   | 31   | 31   | 31   | 27.4 | 24.9 | 30.7 | 37.4 |
| 42 | 999  | 23.9 | 23.4 | 22.8 | 21.7 | 30.5 | 30.3 | 30.1 | 29.7 | 29.3 | 29.1 | 33.4 | 43.6 |
| 42 | 1000 | 23.9 | 23.4 | 22.8 | 21.7 | 30.5 | 30.3 | 30.1 | 29.7 | 31   | 33.2 | 35.7 | 48.7 |
| 42 | 1001 | 23.9 | 23.4 | 22.8 | 21.7 | 30   | 29.6 | 29.2 | 28.4 | 32.5 | 36.5 | 35.5 | 48.3 |
| 42 | 1002 | 23.9 | 23.4 | 22.8 | 21.7 | 29.5 | 28.9 | 28.3 | 27   | 33.5 | 39   | 35   | 47.3 |
| 42 | 1003 | 23.9 | 23.4 | 22.7 | 21.7 | 29.5 | 28.9 | 28.3 | 27   | 34.4 | 40.8 | 34.8 | 46.7 |
| 42 | 1004 | 23.8 | 23.2 | 22.1 | 21.4 | 29   | 28.2 | 27.4 | 25.7 | 34.7 | 41.7 | 33.5 | 43.7 |
| 42 | 1005 | 23.5 | 22.8 | 21.9 | 20.6 | 28.5 | 27.5 | 26.5 | 24.4 | 34.5 | 41.1 | 32   | 40.4 |
| 42 | 1006 | 23.4 | 22.7 | 21.9 | 20.4 | 28.5 | 27.5 | 26.5 | 24.4 | 33.6 | 39.2 | 30.6 | 37.1 |
| 42 | 1007 | 23.4 | 22.7 | 21   | 20.4 | 28.5 | 27.5 | 26.5 | 24.4 | 32.7 | 37.1 | 29.2 | 33.8 |
| 42 | 1008 | 22.9 | 22   | 20.5 | 19   | 28.5 | 27.5 | 26.5 | 24.4 | 31.8 | 35   | 27.9 | 30.8 |
| 43 | 1009 | 22.9 | 21.7 | 21.2 | 17.9 | 29   | 28.5 | 28   | 27   | 31   | 34.5 | 26.6 | 27   |
| 43 | 1010 | 23.3 | 22.3 | 22.5 | 19   | 30   | 29.9 | 29.8 | 29.7 | 30.2 | 32.8 | 25.5 | 24.4 |
| 43 | 1011 | 24   | 23.2 | 24.6 | 20.8 | 30.5 | 30.6 | 30.7 | 31   | 29.5 | 31.1 | 24.5 | 22.1 |
| 43 | 1012 | 25.2 | 24.9 | 26.6 | 24   | 31.5 | 32   | 32.5 | 33.6 | 28.6 | 29.2 | 23.7 | 20.3 |
| 43 | 1013 | 26.3 | 26.5 | 28.4 | 26.9 | 32   | 32.7 | 33.4 | 35   | 27.9 | 27.6 | 23.2 | 19   |
| 43 | 1014 | 27.3 | 27.9 | 29.7 | 29.6 | 32   | 32.7 | 33.4 | 35   | 27.3 | 26.2 | 22.7 | 18   |
| 43 | 1015 | 28   | 28.8 | 30.2 | 31.5 | 32   | 32.7 | 33.4 | 35   | 26.8 | 25   | 22.2 | 16.9 |
| 43 | 1016 | 28.3 | 29.3 | 29.5 | 32.3 | 31.5 | 32   | 32.5 | 33.6 | 26.3 | 23.8 | 21.9 | 16   |
| 43 | 1017 | 27.9 | 28.7 | 28.8 | 31.2 | 31.5 | 32   | 32.5 | 33.6 | 25.8 | 22.7 | 21.7 | 15.7 |
| 43 | 1018 | 27.5 | 28.1 | 28.4 | 30.1 | 31   | 31.3 | 31.6 | 32.3 | 25.4 | 21.8 | 22   | 16.3 |
| 43 | 1019 | 27.3 | 27.9 | 28.1 | 29.6 | 31   | 31.3 | 31.6 | 32.3 | 25.1 | 21.1 | 22.4 | 17.3 |
| 43 | 1020 | 27.1 | 27.6 | 27.5 | 29.1 | 30.5 | 30.6 | 30.7 | 31   | 25.2 | 21.2 | 23.2 | 19.2 |
| 43 | 1021 | 26.8 | 27.2 | 26.8 | 28.3 | 30   | 29.9 | 29.8 | 29.7 | 25.4 | 21.7 | 25.7 | 24.9 |
| 43 | 1022 | 26.4 | 26.6 | 26.6 | 27.2 | 30   | 29.9 | 29.8 | 29.7 | 25.6 | 22.3 | 29.1 | 32.7 |
| 43 | 1023 | 26.3 | 26.5 | 26.1 | 26.9 | 30   | 29.9 | 29.8 | 29.7 | 26.3 | 23.9 | 30.1 | 35   |
| 43 | 1024 | 26   | 26   | 25.7 | 26.1 | 30   | 29.9 | 29.8 | 29.7 | 27.5 | 26.7 | 30.3 | 35.4 |
| 43 | 1025 | 25.8 | 25.8 | 25.4 | 25.6 | 29.5 | 29.2 | 28.9 | 28.3 | 29.5 | 31.2 | 30.9 | 36.9 |
| 43 | 1026 | 25.6 | 25.5 | 24.8 | 25.1 | 29.5 | 29.2 | 28.9 | 28.3 | 31.3 | 35.3 | 30.8 | 36.6 |
| 43 | 1027 | 25.3 | 25.1 | 24.8 | 24.3 | 29.5 | 29.2 | 28.9 | 28.3 | 32.3 | 37.6 | 30.8 | 36.6 |
| 43 | 1028 | 25.3 | 25.1 | 24.1 | 24.3 | 29   | 28.5 | 28   | 27   | 32.2 | 37.4 | 30.5 | 35.9 |
| 43 | 1029 | 24.9 | 24.5 | 23.9 | 23.2 | 29   | 28.5 | 28   | 27   | 31.5 | 35.8 | 29.9 | 34.4 |
| 43 | 1030 | 24.8 | 24.4 | 23.9 | 23   | 28.5 | 27.8 | 27.1 | 25.7 | 30.6 | 33.8 | 29.1 | 32.6 |
| 43 | 1031 | 24.8 | 24.4 | 23.9 | 23   | 28.5 | 27.8 | 27.1 | 25.7 | 29.6 | 31.5 | 28.2 | 30.5 |
| 43 | 1032 | 24.8 | 24.4 | 24.6 | 23   | 29   | 28.5 | 28   | 27   | 28.5 | 29   | 27.4 | 28.7 |
| 44 | 1033 | 25.3 | 25   | 25.7 | 23.9 | 29.5 | 29.3 | 29.1 | 28.7 | 25.1 | 27.5 | 26.7 | 24   |

|    |      |      |      |      |      |      |      |      |      |      |      |      |      |
|----|------|------|------|------|------|------|------|------|------|------|------|------|------|
| 44 | 1034 | 25.9 | 25.8 | 26.6 | 25.5 | 30   | 30   | 30   | 30   | 24.8 | 26.7 | 26.1 | 22.5 |
| 44 | 1035 | 26.4 | 26.5 | 26.8 | 26.9 | 30.5 | 30.7 | 30.9 | 31.3 | 24.4 | 25.8 | 25.6 | 21.5 |
| 44 | 1036 | 26.5 | 26.7 | 27.3 | 27.1 | 31.5 | 32.1 | 32.7 | 34   | 24   | 24.9 | 25.3 | 20.8 |
| 44 | 1037 | 26.8 | 27.1 | 27.5 | 27.9 | 32   | 32.8 | 33.6 | 35.3 | 23.7 | 24.2 | 25   | 20.1 |
| 44 | 1038 | 26.9 | 27.2 | 28.4 | 28.2 | 32   | 32.8 | 33.6 | 35.3 | 23.3 | 23.4 | 24.7 | 19.4 |
| 44 | 1039 | 27.4 | 27.9 | 29.1 | 29.5 | 32   | 32.8 | 33.6 | 35.3 | 22.9 | 22.4 | 24.4 | 18.7 |
| 44 | 1040 | 27.8 | 28.5 | 29.1 | 30.6 | 32   | 32.8 | 33.6 | 35.3 | 22.5 | 21.4 | 24.1 | 17.9 |
| 44 | 1041 | 27.8 | 28.5 | 28.6 | 30.6 | 32   | 32.8 | 33.6 | 35.3 | 22.1 | 20.5 | 23.8 | 17.4 |
| 44 | 1042 | 27.5 | 28.1 | 28.6 | 29.8 | 31.5 | 32.1 | 32.7 | 34   | 21.7 | 19.8 | 23.7 | 17.1 |
| 44 | 1043 | 27.5 | 28.1 | 27.9 | 29.8 | 31.5 | 32.1 | 32.7 | 34   | 21.6 | 19.3 | 23.9 | 17.7 |
| 44 | 1044 | 27.1 | 27.5 | 27.3 | 28.7 | 31   | 31.4 | 31.8 | 32.7 | 21.9 | 20.1 | 24.6 | 19.1 |
| 44 | 1045 | 26.8 | 27.1 | 26.6 | 27.9 | 30.5 | 30.7 | 30.9 | 31.3 | 22.3 | 21.1 | 25.8 | 22   |
| 44 | 1046 | 26.4 | 26.5 | 26.1 | 26.9 | 30   | 30   | 30   | 30   | 22.7 | 21.9 | 28.4 | 28   |
| 44 | 1047 | 26.1 | 26.1 | 25.5 | 26.1 | 30   | 30   | 30   | 30   | 23   | 22.6 | 31.9 | 35.9 |
| 44 | 1048 | 25.8 | 25.7 | 25.2 | 25.3 | 29.5 | 29.3 | 29.1 | 28.7 | 23.8 | 24.6 | 34.4 | 41.6 |
| 44 | 1049 | 25.6 | 25.4 | 24.6 | 24.7 | 29   | 28.6 | 28.2 | 27.3 | 23.4 | 23.6 | 35.9 | 45.2 |
| 44 | 1050 | 25.3 | 25   | 24.5 | 23.9 | 28.5 | 27.9 | 27.3 | 26   | 23.3 | 23.3 | 36.7 | 47.1 |
| 44 | 1051 | 25.2 | 24.8 | 23.9 | 23.7 | 28.5 | 27.9 | 27.3 | 26   | 23.5 | 23.8 | 36.7 | 46.9 |
| 44 | 1052 | 24.9 | 24.4 | 23.7 | 22.9 | 28   | 27.2 | 26.4 | 24.7 | 24.1 | 25.2 | 35.5 | 44.4 |
| 44 | 1053 | 24.8 | 24.3 | 23   | 22.6 | 28   | 27.2 | 26.4 | 24.7 | 24.4 | 25.8 | 34   | 40.8 |
| 44 | 1054 | 24.4 | 23.7 | 23   | 21.5 | 27.5 | 26.5 | 25.5 | 23.4 | 24.1 | 25.3 | 32.5 | 37.5 |
| 44 | 1055 | 24.4 | 23.7 | 22.8 | 21.5 | 27.5 | 26.5 | 25.5 | 23.4 | 23.7 | 24.2 | 31.2 | 34.5 |
| 44 | 1056 | 24.3 | 23.6 | 23.9 | 21.3 | 27.5 | 26.5 | 25.5 | 23.4 | 23.1 | 23   | 29.4 | 30.2 |
| 45 | 1057 | 24.3 | 24.1 | 24.4 | 23.4 | 28   | 27.6 | 27.2 | 26.3 | 22.6 | 24.8 | 27.7 | 26.7 |
| 45 | 1058 | 24.6 | 24.5 | 25.1 | 24.2 | 28.5 | 28.3 | 28.1 | 27.6 | 22.1 | 23.7 | 26.2 | 23.3 |
| 45 | 1059 | 25   | 25.1 | 25.7 | 25.2 | 29.5 | 29.7 | 29.9 | 30.3 | 21.6 | 22.6 | 25   | 20.4 |
| 45 | 1060 | 25.3 | 25.5 | 26   | 26   | 30.5 | 31.1 | 31.7 | 32.9 | 21.2 | 21.7 | 23.9 | 17.8 |
| 45 | 1061 | 25.5 | 25.8 | 26.7 | 26.6 | 31.5 | 32.5 | 33.5 | 35.6 | 20.9 | 20.9 | 22.9 | 15.7 |
| 45 | 1062 | 25.9 | 26.3 | 27.6 | 27.6 | 32   | 33.2 | 34.4 | 36.9 | 20.6 | 20.2 | 22.1 | 13.8 |
| 45 | 1063 | 26.4 | 27   | 28.5 | 29   | 32   | 33.2 | 34.4 | 36.9 | 20.3 | 19.5 | 21.3 | 11.9 |
| 45 | 1064 | 26.9 | 27.7 | 28.7 | 30.3 | 32   | 33.2 | 34.4 | 36.9 | 20.1 | 19   | 20.6 | 10.3 |
| 45 | 1065 | 27   | 27.9 | 28.4 | 30.6 | 32   | 33.2 | 34.4 | 36.9 | 19.9 | 18.6 | 20.2 | 9.3  |
| 45 | 1066 | 26.8 | 27.6 | 27.8 | 30   | 26.5 | 25.5 | 24.5 | 22.3 | 19.8 | 18.3 | 20.6 | 10.3 |
| 45 | 1067 | 26.5 | 27.2 | 27.5 | 29.2 | 28.5 | 28.3 | 28.1 | 27.6 | 19.9 | 18.7 | 22.2 | 13.9 |
| 45 | 1068 | 26.3 | 26.9 | 26.6 | 28.7 | 29   | 29   | 29   | 28.9 | 19.7 | 18.2 | 24.6 | 19.5 |
| 45 | 1069 | 25.8 | 26.2 | 25.8 | 27.4 | 28.5 | 28.3 | 28.1 | 27.6 | 19.9 | 18.6 | 27.4 | 26   |
| 45 | 1070 | 25.4 | 25.6 | 24.9 | 26.3 | 28.5 | 28.3 | 28.1 | 27.6 | 20.6 | 20.1 | 31   | 34.3 |
| 45 | 1071 | 24.9 | 24.9 | 24.6 | 25   | 28.5 | 28.3 | 28.1 | 27.6 | 20.7 | 20.5 | 34   | 41.2 |
| 45 | 1072 | 24.7 | 24.6 | 24   | 24.5 | 28.5 | 28.3 | 28.1 | 27.6 | 21.1 | 21.4 | 36.3 | 46.4 |
| 45 | 1073 | 24.4 | 24.2 | 23.1 | 23.7 | 28.5 | 28.3 | 28.1 | 27.6 | 21.6 | 22.6 | 37.5 | 49.3 |
| 45 | 1074 | 23.9 | 23.5 | 22.2 | 22.3 | 28   | 27.6 | 27.2 | 26.3 | 21.8 | 23.1 | 37.8 | 49.8 |
| 45 | 1075 | 23.4 | 22.8 | 21.9 | 21   | 28   | 27.6 | 27.2 | 26.3 | 21.8 | 23.1 | 37.5 | 49.1 |
| 45 | 1076 | 23.2 | 22.5 | 21.3 | 20.5 | 28   | 27.6 | 27.2 | 26.3 | 21.6 | 22.6 | 36.4 | 46.5 |
| 45 | 1077 | 22.9 | 22.1 | 20.6 | 19.7 | 28   | 27.6 | 27.2 | 26.3 | 21.6 | 22.5 | 34.7 | 42.7 |
| 45 | 1078 | 22.5 | 21.6 | 20.4 | 18.6 | 27.5 | 26.9 | 26.3 | 24.9 | 21.4 | 22   | 33   | 38.8 |
| 45 | 1079 | 22.4 | 21.4 | 20.4 | 18.3 | 27.5 | 26.9 | 26.3 | 24.9 | 20.9 | 20.9 | 31.4 | 35.1 |
| 45 | 1080 | 22.4 | 21.4 | 22   | 18.3 | 27.5 | 26.9 | 26.3 | 24.9 | 20.3 | 19.5 | 29.9 | 31.8 |
| 46 | 1081 | 23.1 | 22.6 | 23.5 | 20.9 | 27.5 | 26.6 | 25.6 | 23.6 | 19.7 | 19   | 28.7 | 28.3 |
| 46 | 1082 | 23.9 | 23.7 | 25.1 | 23   | 28   | 27.3 | 26.5 | 24.9 | 19.3 | 17.9 | 27.6 | 25.7 |
| 46 | 1083 | 24.8 | 25   | 26.9 | 25.4 | 28.5 | 28   | 27.4 | 26.3 | 18.8 | 16.9 | 26.6 | 23.4 |
| 46 | 1084 | 25.8 | 26.4 | 28.7 | 28.1 | 29.5 | 29.4 | 29.2 | 28.9 | 18.4 | 15.8 | 25.6 | 21.2 |
| 46 | 1085 | 26.8 | 27.8 | 29.6 | 30.7 | 30.5 | 30.8 | 31   | 31.6 | 18   | 15   | 24.8 | 19.4 |
| 46 | 1086 | 27.3 | 28.5 | 29.8 | 32.1 | 31   | 31.5 | 31.9 | 32.9 | 17.6 | 14.1 | 24.1 | 17.6 |
| 46 | 1087 | 27.4 | 28.6 | 29.8 | 32.3 | 31.5 | 32.2 | 32.8 | 34.2 | 17.2 | 13.2 | 23.4 | 16.1 |
| 46 | 1088 | 27.4 | 28.6 | 28.9 | 32.3 | 31.5 | 32.2 | 32.8 | 34.2 | 16.8 | 12.2 | 22.7 | 14.6 |
| 46 | 1089 | 26.9 | 27.9 | 27.8 | 31   | 31   | 31.5 | 31.9 | 32.9 | 16.4 | 11.3 | 22.4 | 13.9 |
| 46 | 1090 | 26.3 | 27.1 | 27.1 | 29.4 | 31   | 31.5 | 31.9 | 32.9 | 16.2 | 10.8 | 22.5 | 14   |
| 46 | 1091 | 25.9 | 26.5 | 26.2 | 28.4 | 31   | 31.5 | 31.9 | 32.9 | 16.1 | 10.7 | 23.2 | 15.8 |
| 46 | 1092 | 25.4 | 25.8 | 25.3 | 27   | 31   | 31.5 | 31.9 | 32.9 | 16.5 | 11.6 | 25   | 19.8 |
| 46 | 1093 | 24.9 | 25.1 | 24.6 | 25.7 | 30.5 | 30.8 | 31   | 31.6 | 18.1 | 15.2 | 26.7 | 23.8 |
| 46 | 1094 | 24.5 | 24.5 | 23.8 | 24.6 | 30.5 | 30.8 | 31   | 31.6 | 19.9 | 19.4 | 30   | 31.3 |
| 46 | 1095 | 24.1 | 24   | 23.5 | 23.6 | 30   | 30.1 | 30.1 | 30.2 | 21.8 | 23.8 | 33.1 | 38.5 |
| 46 | 1096 | 23.9 | 23.7 | 22.6 | 23   | 30   | 30.1 | 30.1 | 30.2 | 23.3 | 27.1 | 35.3 | 43.5 |
| 46 | 1097 | 23.4 | 23   | 21.7 | 21.7 | 29.5 | 29.4 | 29.2 | 28.9 | 24.1 | 29   | 36.1 | 45.4 |
| 46 | 1098 | 22.9 | 22.3 | 21   | 20.4 | 29.5 | 29.4 | 29.2 | 28.9 | 24.6 | 30.2 | 36.4 | 45.9 |

|    |      |      |      |      |      |      |      |      |      |      |      |      |      |
|----|------|------|------|------|------|------|------|------|------|------|------|------|------|
| 46 | 1099 | 22.5 | 21.7 | 20.6 | 19.3 | 29.5 | 29.4 | 29.2 | 28.9 | 24.9 | 31   | 36.4 | 45.9 |
| 46 | 1100 | 22.3 | 21.5 | 19.9 | 18.8 | 29   | 28.7 | 28.3 | 27.6 | 25.1 | 31.3 | 35.6 | 44.2 |
| 46 | 1101 | 21.9 | 20.9 | 19.2 | 17.7 | 29   | 28.7 | 28.3 | 27.6 | 24.7 | 30.3 | 34.3 | 41.2 |
| 46 | 1102 | 21.5 | 20.3 | 19   | 16.7 | 29   | 28.7 | 28.3 | 27.6 | 23.9 | 28.6 | 33   | 38.2 |
| 46 | 1103 | 21.4 | 20.2 | 19.7 | 16.4 | 29   | 28.7 | 28.3 | 27.6 | 23.2 | 26.9 | 31.7 | 35.3 |
| 46 | 1104 | 21.8 | 20.8 | 21   | 17.4 | 29   | 28.7 | 28.3 | 27.6 | 22.4 | 25   | 30.6 | 32.6 |
| 47 | 1105 | 22.5 | 21.8 | 22.7 | 19.5 | 29.5 | 29.2 | 28.9 | 28.2 | 21.6 | 20.8 | 29.5 | 29   |
| 47 | 1106 | 23.4 | 23   | 24.5 | 21.9 | 29.5 | 29.2 | 28.9 | 28.2 | 21.1 | 19.5 | 28.6 | 26.9 |
| 47 | 1107 | 24.4 | 24.4 | 26.4 | 24.5 | 30   | 29.9 | 29.8 | 29.5 | 20.6 | 18.5 | 27.7 | 25   |
| 47 | 1108 | 25.5 | 26   | 28.2 | 27.5 | 30.5 | 30.6 | 30.7 | 30.8 | 20.1 | 17.3 | 26.9 | 23.1 |
| 47 | 1109 | 26.5 | 27.4 | 29.7 | 30.1 | 31   | 31.3 | 31.6 | 32.1 | 19.6 | 16.1 | 26.2 | 21.4 |
| 47 | 1110 | 27.3 | 28.5 | 29.7 | 32.3 | 31.5 | 32   | 32.5 | 33.5 | 19.1 | 15.1 | 25.5 | 19.8 |
| 47 | 1111 | 27.3 | 28.5 | 29.9 | 32.3 | 32   | 32.7 | 33.4 | 34.8 | 18.7 | 14.2 | 24.7 | 18.1 |
| 47 | 1112 | 27.4 | 28.6 | 28.8 | 32.5 | 31.5 | 32   | 32.5 | 33.5 | 18.4 | 13.4 | 24.1 | 16.5 |
| 47 | 1113 | 26.8 | 27.8 | 27.9 | 30.9 | 31.5 | 32   | 32.5 | 33.5 | 18.1 | 12.7 | 23.4 | 15.1 |
| 47 | 1114 | 26.3 | 27.1 | 27   | 29.6 | 31.5 | 32   | 32.5 | 33.5 | 17.9 | 12.3 | 23.4 | 15.1 |
| 47 | 1115 | 25.8 | 26.4 | 26.1 | 28.3 | 31   | 31.3 | 31.6 | 32.1 | 17.9 | 12.2 | 24.5 | 17.5 |
| 47 | 1116 | 25.3 | 25.7 | 25.4 | 26.9 | 31   | 31.3 | 31.6 | 32.1 | 18.3 | 13.1 | 26.7 | 22.5 |
| 47 | 1117 | 24.9 | 25.1 | 24.5 | 25.9 | 30.5 | 30.6 | 30.7 | 30.8 | 19.8 | 16.7 | 29.5 | 29   |
| 47 | 1118 | 24.4 | 24.4 | 23.7 | 24.5 | 30.5 | 30.6 | 30.7 | 30.8 | 21.7 | 21.1 | 31.9 | 34.6 |
| 47 | 1119 | 24   | 23.9 | 23.4 | 23.5 | 30.5 | 30.6 | 30.7 | 30.8 | 23.9 | 26   | 34.3 | 40.1 |
| 47 | 1120 | 23.8 | 23.6 | 22.7 | 22.9 | 30   | 29.9 | 29.8 | 29.5 | 25.8 | 30.5 | 35.6 | 43.1 |
| 47 | 1121 | 23.4 | 23   | 21.8 | 21.9 | 30   | 29.9 | 29.8 | 29.5 | 27.2 | 33.7 | 36   | 44.1 |
| 47 | 1122 | 22.9 | 22.3 | 21   | 20.5 | 30   | 29.9 | 29.8 | 29.5 | 27.3 | 33.8 | 36.3 | 44.6 |
| 47 | 1123 | 22.5 | 21.8 | 20.7 | 19.5 | 29.5 | 29.2 | 28.9 | 28.2 | 27.4 | 34.2 | 36.1 | 44.2 |
| 47 | 1124 | 22.3 | 21.5 | 20   | 19   | 29.5 | 29.2 | 28.9 | 28.2 | 27.2 | 33.6 | 35.4 | 42.6 |
| 47 | 1125 | 21.9 | 20.9 | 19.2 | 17.9 | 29.5 | 29.2 | 28.9 | 28.2 | 26.7 | 32.4 | 34.4 | 40.2 |
| 47 | 1126 | 21.5 | 20.4 | 19.2 | 16.8 | 29   | 28.5 | 28   | 26.8 | 25.9 | 30.6 | 33.2 | 37.6 |
| 47 | 1127 | 21.5 | 20.4 | 20.1 | 16.8 | 29   | 28.5 | 28   | 26.8 | 24.9 | 28.4 | 32   | 34.7 |
| 47 | 1128 | 22   | 21.1 | 21.8 | 18.2 | 29   | 28.5 | 28   | 26.8 | 23.9 | 26.1 | 30.7 | 31.9 |
| 48 | 1129 | 22.8 | 22.3 | 23.6 | 20.7 | 29.5 | 28.9 | 28.3 | 27   | 23.1 | 23.1 | 29.6 | 28.8 |
| 48 | 1130 | 23.8 | 23.7 | 25.4 | 23.3 | 30.5 | 30.3 | 30.1 | 29.6 | 22.3 | 21.4 | 28.6 | 26.3 |
| 48 | 1131 | 24.8 | 25.1 | 26.3 | 26   | 31   | 31   | 31   | 31   | 21.6 | 19.8 | 27.6 | 24.2 |
| 48 | 1132 | 25.3 | 25.8 | 27.2 | 27.3 | 31.5 | 31.7 | 31.9 | 32.3 | 21   | 18.4 | 26.7 | 22   |
| 48 | 1133 | 25.8 | 26.5 | 27.4 | 28.6 | 32   | 32.4 | 32.8 | 33.6 | 20.5 | 17.1 | 25.9 | 20.1 |
| 48 | 1134 | 25.9 | 26.6 | 27.5 | 28.9 | 32.5 | 33.1 | 33.7 | 35   | 20   | 16   | 25.1 | 18.4 |
| 48 | 1135 | 26   | 26.8 | 27.9 | 29.2 | 32.5 | 33.1 | 33.7 | 35   | 19.5 | 14.9 | 24.4 | 16.7 |
| 48 | 1136 | 26.2 | 27   | 27.2 | 29.7 | 32.5 | 33.1 | 33.7 | 35   | 19.1 | 13.9 | 23.7 | 15.1 |
| 48 | 1137 | 25.8 | 26.5 | 26.5 | 28.6 | 32.5 | 33.1 | 33.7 | 35   | 18.7 | 13   | 23.2 | 14   |
| 48 | 1138 | 25.4 | 25.9 | 26.3 | 27.6 | 32.5 | 33.1 | 33.7 | 35   | 18.4 | 12.3 | 23.2 | 14   |
| 48 | 1139 | 25.3 | 25.8 | 25.4 | 27.3 | 32   | 32.4 | 32.8 | 33.6 | 18.3 | 12.1 | 24.1 | 16.1 |
| 48 | 1140 | 24.8 | 25.1 | 24.7 | 26   | 32   | 32.4 | 32.8 | 33.6 | 18.6 | 12.7 | 26   | 20.4 |
| 48 | 1141 | 24.4 | 24.5 | 23.8 | 24.9 | 31.5 | 31.7 | 31.9 | 32.3 | 20.1 | 16.2 | 28.8 | 26.9 |
| 48 | 1142 | 23.9 | 23.8 | 23   | 23.6 | 31.5 | 31.7 | 31.9 | 32.3 | 21.7 | 20.1 | 31.8 | 33.8 |
| 48 | 1143 | 23.5 | 23.3 | 22.9 | 22.5 | 31   | 31   | 31   | 31   | 23.6 | 24.2 | 34.5 | 40   |
| 48 | 1144 | 23.4 | 23.1 | 22.1 | 22.3 | 30.5 | 30.3 | 30.1 | 29.6 | 25.3 | 28.3 | 36.5 | 44.7 |
| 48 | 1145 | 23   | 22.6 | 22   | 21.2 | 30.5 | 30.3 | 30.1 | 29.6 | 26.8 | 31.7 | 37.8 | 47.7 |
| 48 | 1146 | 22.9 | 22.4 | 21.8 | 20.9 | 30.5 | 30.3 | 30.1 | 29.6 | 27.9 | 34.3 | 38.5 | 49.3 |
| 48 | 1147 | 22.8 | 22.3 | 21.1 | 20.7 | 30   | 29.6 | 29.2 | 28.3 | 28.6 | 35.8 | 38.2 | 48.4 |
| 48 | 1148 | 22.4 | 21.7 | 21.1 | 19.6 | 30   | 29.6 | 29.2 | 28.3 | 28.8 | 36.3 | 37.2 | 46.3 |
| 48 | 1149 | 22.4 | 21.7 | 20.9 | 19.6 | 29.5 | 28.9 | 28.3 | 27   | 28.4 | 35.3 | 35.9 | 43.3 |
| 48 | 1150 | 22.3 | 21.6 | 20.9 | 19.3 | 29.5 | 28.9 | 28.3 | 27   | 27.7 | 33.7 | 34.4 | 39.8 |
| 48 | 1151 | 22.3 | 21.6 | 21.8 | 19.3 | 29.5 | 28.9 | 28.3 | 27   | 26.8 | 31.7 | 33   | 36.7 |
| 48 | 1152 | 22.8 | 22.3 | 22   | 20.7 | 29.5 | 28.9 | 28.3 | 27   | 25.8 | 29.5 | 31.8 | 33.8 |
| 49 | 1153 | 23.5 | 22.8 | 23.6 | 20.4 | 30   | 29.4 | 28.9 | 27.7 | 25   | 24.7 | 30.7 | 36.8 |
| 49 | 1154 | 24.4 | 24   | 25.3 | 22.8 | 30.5 | 30.1 | 29.8 | 29   | 24.2 | 22.9 | 29.8 | 34.7 |
| 49 | 1155 | 25.3 | 25.3 | 27.4 | 25.2 | 31   | 30.8 | 30.7 | 30.3 | 23.5 | 21.4 | 29   | 32.8 |
| 49 | 1156 | 26.5 | 27   | 29.2 | 28.4 | 31.5 | 31.5 | 31.6 | 31.7 | 22.9 | 20   | 28.4 | 31.4 |
| 49 | 1157 | 27.5 | 28.4 | 30.7 | 31.1 | 32.5 | 32.9 | 33.4 | 34.3 | 22.4 | 18.8 | 27.7 | 29.9 |
| 49 | 1158 | 28.3 | 29.5 | 31.6 | 33.2 | 33   | 33.6 | 34.3 | 35.7 | 21.9 | 17.6 | 27.2 | 28.6 |
| 49 | 1159 | 28.8 | 30.2 | 31.2 | 34.5 | 33   | 33.6 | 34.3 | 35.7 | 21.4 | 16.6 | 26.7 | 27.6 |
| 49 | 1160 | 28.6 | 29.9 | 30.1 | 34   | 33   | 33.6 | 34.3 | 35.7 | 21   | 15.6 | 26.2 | 26.5 |
| 49 | 1161 | 28   | 29.1 | 28.9 | 32.4 | 32.5 | 32.9 | 33.4 | 34.3 | 20.6 | 14.7 | 25.7 | 25.2 |
| 49 | 1162 | 27.3 | 28.1 | 28   | 30.5 | 32.5 | 32.9 | 33.4 | 34.3 | 20.3 | 14   | 25.2 | 24.1 |
| 49 | 1163 | 26.8 | 27.4 | 27.2 | 29.2 | 32.5 | 32.9 | 33.4 | 34.3 | 20.2 | 13.8 | 24   | 21.3 |

|    |      |      |      |      |      |      |      |      |      |      |      |      |      |
|----|------|------|------|------|------|------|------|------|------|------|------|------|------|
| 49 | 1164 | 26.4 | 26.8 | 26.3 | 28.1 | 32   | 32.2 | 32.5 | 33   | 20.5 | 14.5 | 23.5 | 20.2 |
| 49 | 1165 | 25.9 | 26.1 | 25.4 | 26.8 | 32   | 32.2 | 32.5 | 33   | 22.1 | 18.1 | 23.4 | 20   |
| 49 | 1166 | 25.4 | 25.4 | 24.7 | 25.5 | 31.5 | 31.5 | 31.6 | 31.7 | 24.1 | 22.7 | 23.5 | 20.2 |
| 49 | 1167 | 25   | 24.9 | 24.4 | 24.4 | 31.5 | 31.5 | 31.6 | 31.7 | 26.1 | 27.3 | 23.2 | 19.6 |
| 49 | 1168 | 24.8 | 24.6 | 23.6 | 23.9 | 31   | 30.8 | 30.7 | 30.3 | 27.9 | 31.5 | 25.4 | 24.5 |
| 49 | 1169 | 24.4 | 24   | 22.7 | 22.8 | 31   | 30.8 | 30.7 | 30.3 | 29.4 | 34.9 | 27   | 28.2 |
| 49 | 1170 | 23.9 | 23.3 | 22   | 21.5 | 31   | 30.8 | 30.7 | 30.3 | 30.4 | 37.2 | 27.9 | 30.2 |
| 49 | 1171 | 23.5 | 22.8 | 21.8 | 20.4 | 30.5 | 30.1 | 29.8 | 29   | 31   | 38.6 | 27.9 | 30.2 |
| 49 | 1172 | 23.4 | 22.6 | 20.9 | 20.2 | 30.5 | 30.1 | 29.8 | 29   | 31   | 38.5 | 26.9 | 28.1 |
| 49 | 1173 | 22.9 | 21.9 | 20.6 | 18.8 | 30.5 | 30.1 | 29.8 | 29   | 30.6 | 37.6 | 25.6 | 25.1 |
| 49 | 1174 | 22.7 | 21.6 | 20   | 18.3 | 30   | 29.4 | 28.9 | 27.7 | 29.8 | 35.9 | 24.4 | 22.3 |
| 49 | 1175 | 22.4 | 21.2 | 20.8 | 17.5 | 30   | 29.4 | 28.9 | 27.7 | 28.9 | 33.8 | 23.4 | 19.9 |
| 49 | 1176 | 22.8 | 21.8 | 22.1 | 18.6 | 30   | 29.4 | 28.9 | 27.7 | 28   | 31.6 | 22.4 | 17.6 |
| 50 | 1177 | 23.8 | 23   | 23.9 | 20.3 | 30.5 | 30.3 | 30   | 29.5 | 27.1 | 27.4 | 21.5 | 16.3 |
| 50 | 1178 | 24.8 | 24.4 | 25.7 | 23   | 30.5 | 30.3 | 30   | 29.5 | 26.3 | 25.7 | 20.6 | 14.3 |
| 50 | 1179 | 25.8 | 25.8 | 27.9 | 25.7 | 31   | 31   | 30.9 | 30.8 | 25.6 | 24.1 | 19.9 | 12.7 |
| 50 | 1180 | 27   | 27.4 | 29.7 | 28.9 | 31.5 | 31.7 | 31.8 | 32.2 | 25   | 22.7 | 19.4 | 11.4 |
| 50 | 1181 | 28   | 28.8 | 31.1 | 31.5 | 32   | 32.4 | 32.7 | 33.5 | 24.5 | 21.4 | 18.8 | 10.1 |
| 50 | 1182 | 28.8 | 30   | 31.5 | 33.6 | 32.5 | 33.1 | 33.6 | 34.8 | 24   | 20.2 | 18.5 | 9.4  |
| 50 | 1183 | 29   | 30.2 | 31.3 | 34.2 | 33   | 33.8 | 34.5 | 36.1 | 23.4 | 19.1 | 18.2 | 8.8  |
| 50 | 1184 | 28.9 | 30.1 | 30.4 | 33.9 | 33   | 33.8 | 34.5 | 36.1 | 23   | 18.1 | 18   | 8.2  |
| 50 | 1185 | 28.4 | 29.4 | 29.3 | 32.6 | 32.5 | 33.1 | 33.6 | 34.8 | 22.6 | 17.2 | 17.9 | 8.1  |
| 50 | 1186 | 27.8 | 28.6 | 28.4 | 31   | 32.5 | 33.1 | 33.6 | 34.8 | 22.3 | 16.3 | 18.5 | 9.5  |
| 50 | 1187 | 27.3 | 27.9 | 27.5 | 29.7 | 32.5 | 33.1 | 33.6 | 34.8 | 22.1 | 15.9 | 20.6 | 14.3 |
| 50 | 1188 | 26.8 | 27.2 | 26.8 | 28.3 | 32   | 32.4 | 32.7 | 33.5 | 22.3 | 16.4 | 23.7 | 21.3 |
| 50 | 1189 | 26.4 | 26.6 | 25.9 | 27.3 | 32   | 32.4 | 32.7 | 33.5 | 23.7 | 19.6 | 26.9 | 28.8 |
| 50 | 1190 | 25.9 | 25.9 | 25.4 | 25.9 | 31.5 | 31.7 | 31.8 | 32.2 | 25.5 | 23.8 | 30.2 | 36.4 |
| 50 | 1191 | 25.6 | 25.5 | 24.8 | 25.1 | 31.5 | 31.7 | 31.8 | 32.2 | 27.4 | 28.2 | 32.3 | 41.1 |
| 50 | 1192 | 25.3 | 25.1 | 24.1 | 24.3 | 31   | 31   | 30.9 | 30.8 | 29.3 | 32.5 | 33.4 | 43.7 |
| 50 | 1193 | 24.9 | 24.5 | 23.4 | 23.3 | 30.5 | 30.3 | 30   | 29.5 | 30.8 | 36.1 | 33.7 | 44.3 |
| 50 | 1194 | 24.5 | 23.9 | 23.2 | 22.2 | 30.5 | 30.3 | 30   | 29.5 | 31.9 | 38.6 | 34.4 | 46   |
| 50 | 1195 | 24.4 | 23.8 | 22.3 | 21.9 | 30   | 29.6 | 29.1 | 28.2 | 32.5 | 39.9 | 34.5 | 46.2 |
| 50 | 1196 | 23.9 | 23.1 | 21.6 | 20.6 | 29.5 | 28.9 | 28.2 | 26.8 | 32.2 | 39.2 | 33.3 | 43.4 |
| 50 | 1197 | 23.5 | 22.5 | 21.4 | 19.6 | 29.5 | 28.9 | 28.2 | 26.8 | 31.7 | 38   | 31.6 | 39.6 |
| 50 | 1198 | 23.4 | 22.4 | 21.2 | 19.3 | 29   | 28.2 | 27.3 | 25.5 | 30.8 | 36.1 | 30   | 35.8 |
| 50 | 1199 | 23.3 | 22.3 | 21.8 | 19   | 29   | 28.2 | 27.3 | 25.5 | 29.9 | 34   | 28.6 | 32.5 |
| 50 | 1200 | 23.6 | 22.7 | 22.6 | 19.8 | 29   | 28.2 | 27.3 | 25.5 | 29   | 31.8 | 27.2 | 29.5 |
| 51 | 1201 | 24.4 | 23.5 | 24.3 | 20.8 | 29.5 | 29.1 | 28.7 | 27.9 | 28.2 | 29.3 | 26.1 | 23.2 |
| 51 | 1202 | 25.3 | 24.8 | 26.4 | 23.1 | 30   | 29.8 | 29.6 | 29.2 | 27.5 | 27.6 | 25.1 | 20.9 |
| 51 | 1203 | 26.5 | 26.5 | 28.6 | 26.3 | 30.5 | 30.5 | 30.5 | 30.6 | 26.9 | 26.3 | 24.2 | 18.9 |
| 51 | 1204 | 27.7 | 28.1 | 30.4 | 29.5 | 31.5 | 31.9 | 32.3 | 33.2 | 26.4 | 25   | 23.4 | 17   |
| 51 | 1205 | 28.7 | 29.5 | 31.8 | 32.2 | 32   | 32.6 | 33.2 | 34.6 | 25.7 | 23.6 | 22.7 | 15.3 |
| 51 | 1206 | 29.5 | 30.7 | 32.4 | 34.3 | 32   | 32.6 | 33.2 | 34.6 | 25.2 | 22.3 | 22.1 | 13.8 |
| 51 | 1207 | 29.8 | 31.1 | 32.4 | 35.1 | 32   | 32.6 | 33.2 | 34.6 | 24.7 | 21.1 | 21.5 | 12.5 |
| 51 | 1208 | 29.8 | 31.1 | 30.9 | 35.1 | 32   | 32.6 | 33.2 | 34.6 | 24.2 | 20   | 20.9 | 11.2 |
| 51 | 1209 | 29   | 30   | 30   | 33   | 31.5 | 31.9 | 32.3 | 33.2 | 23.9 | 19.3 | 20.7 | 10.7 |
| 51 | 1210 | 28.5 | 29.3 | 29.3 | 31.7 | 31.5 | 31.9 | 32.3 | 33.2 | 23.7 | 18.8 | 21.2 | 11.8 |
| 51 | 1211 | 28.1 | 28.7 | 28.4 | 30.6 | 31   | 31.2 | 31.4 | 31.9 | 23.6 | 18.6 | 23.1 | 16.1 |
| 51 | 1212 | 27.6 | 28   | 27.9 | 29.3 | 31   | 31.2 | 31.4 | 31.9 | 23.6 | 18.6 | 26.2 | 23.3 |
| 51 | 1213 | 27.3 | 27.6 | 27   | 28.5 | 30.5 | 30.5 | 30.5 | 30.6 | 23.9 | 19.3 | 28.8 | 29.4 |
| 51 | 1214 | 26.8 | 26.9 | 26.2 | 27.1 | 30.5 | 30.5 | 30.5 | 30.6 | 25.2 | 22.3 | 31   | 34.5 |
| 51 | 1215 | 26.4 | 26.3 | 25.3 | 26.1 | 30.5 | 30.5 | 30.5 | 30.6 | 27.1 | 26.7 | 34   | 41.4 |
| 51 | 1216 | 25.9 | 25.6 | 24.8 | 24.7 | 30   | 29.8 | 29.6 | 29.2 | 28.9 | 30.9 | 36.4 | 46.9 |
| 51 | 1217 | 25.6 | 25.2 | 24.3 | 23.9 | 30   | 29.8 | 29.6 | 29.2 | 30.5 | 34.4 | 37.7 | 49.9 |
| 51 | 1218 | 25.3 | 24.8 | 23.5 | 23.1 | 29.5 | 29.1 | 28.7 | 27.9 | 31.6 | 36.9 | 37.7 | 49.7 |
| 51 | 1219 | 24.9 | 24.2 | 23   | 22.1 | 29.5 | 29.1 | 28.7 | 27.9 | 32.2 | 38.4 | 36.3 | 46.6 |
| 51 | 1220 | 24.6 | 23.8 | 22.6 | 21.3 | 29.5 | 29.1 | 28.7 | 27.9 | 32.3 | 38.5 | 35.1 | 43.9 |
| 51 | 1221 | 24.4 | 23.5 | 21.9 | 20.8 | 29.5 | 29.1 | 28.7 | 27.9 | 31.9 | 37.7 | 33.7 | 40.7 |
| 51 | 1222 | 24   | 23   | 21.7 | 19.7 | 29   | 28.4 | 27.8 | 26.6 | 31.2 | 36.1 | 32.4 | 37.5 |
| 51 | 1223 | 23.9 | 22.8 | 22.5 | 19.4 | 29   | 28.4 | 27.8 | 26.6 | 30.3 | 34   | 31   | 34.4 |
| 51 | 1224 | 24.3 | 23.4 | 23.3 | 20.5 | 29   | 28.4 | 27.8 | 26.6 | 29.5 | 32.1 | 29.7 | 31.5 |
| 52 | 1225 | 25   | 24.2 | 25.3 | 21.5 | 29   | 28.1 | 27.2 | 25.3 | 28.7 | 31.3 | 28.7 | 28.3 |
| 52 | 1226 | 26.1 | 25.7 | 27.5 | 24.5 | 29.5 | 28.8 | 28.1 | 26.7 | 28   | 29.7 | 27.8 | 26.3 |
| 52 | 1227 | 27.3 | 27.4 | 29.6 | 27.7 | 30   | 29.5 | 29   | 28   | 27.4 | 28.3 | 26.9 | 24.2 |
| 52 | 1228 | 28.5 | 29.1 | 31.3 | 30.9 | 31   | 30.9 | 30.8 | 30.7 | 26.9 | 27.1 | 26.2 | 22.5 |

|    |      |      |      |      |      |      |      |      |      |      |      |      |      |
|----|------|------|------|------|------|------|------|------|------|------|------|------|------|
| 52 | 1229 | 29.4 | 30.3 | 32.3 | 33.3 | 31.5 | 31.6 | 31.7 | 32   | 26.3 | 25.7 | 25.4 | 20.8 |
| 52 | 1230 | 30   | 31.2 | 33.6 | 34.8 | 32   | 32.3 | 32.6 | 33.3 | 25.7 | 24.4 | 24.7 | 19.2 |
| 52 | 1231 | 30.7 | 32.1 | 33.1 | 36.7 | 32   | 32.3 | 32.6 | 33.3 | 25.3 | 23.3 | 24.2 | 18.1 |
| 52 | 1232 | 30.4 | 31.7 | 32.3 | 35.9 | 32   | 32.3 | 32.6 | 33.3 | 24.8 | 22.3 | 23.7 | 16.9 |
| 52 | 1233 | 30   | 31.2 | 31.4 | 34.8 | 32   | 32.3 | 32.6 | 33.3 | 24.5 | 21.6 | 23.3 | 15.9 |
| 52 | 1234 | 29.5 | 30.5 | 31.1 | 33.5 | 32   | 32.3 | 32.6 | 33.3 | 24.2 | 20.9 | 23.6 | 16.6 |
| 52 | 1235 | 29.3 | 30.2 | 30.2 | 33   | 32   | 32.3 | 32.6 | 33.3 | 23.9 | 20.2 | 25.1 | 19.9 |
| 52 | 1236 | 28.8 | 29.5 | 29.3 | 31.7 | 32   | 32.3 | 32.6 | 33.3 | 23.9 | 20.2 | 26.9 | 24.2 |
| 52 | 1237 | 28.3 | 28.8 | 28.4 | 30.3 | 32   | 32.3 | 32.6 | 33.3 | 24.4 | 21.3 | 28.5 | 27.8 |
| 52 | 1238 | 27.8 | 28.1 | 27.8 | 29   | 31.5 | 31.6 | 31.7 | 32   | 25.1 | 23   | 30.2 | 31.9 |
| 52 | 1239 | 27.5 | 27.7 | 27.5 | 28.2 | 31.5 | 31.6 | 31.7 | 32   | 26.3 | 25.8 | 32   | 35.9 |
| 52 | 1240 | 27.3 | 27.4 | 21.2 | 27.7 | 31.5 | 31.6 | 31.7 | 32   | 27.3 | 28.1 | 33.5 | 39.3 |
| 52 | 1241 | 23.8 | 22.5 | 20.8 | 18.4 | 31.5 | 31.6 | 31.7 | 32   | 28.3 | 30.3 | 34.3 | 41.2 |
| 52 | 1242 | 23.6 | 22.2 | 22.3 | 17.8 | 31   | 30.9 | 30.8 | 30.7 | 29   | 31.8 | 35.1 | 43.1 |
| 52 | 1243 | 24.4 | 23.3 | 22.3 | 20   | 31   | 30.9 | 30.8 | 30.7 | 29.2 | 32.3 | 35.2 | 43.3 |
| 52 | 1244 | 24.4 | 23.3 | 22.3 | 20   | 31   | 30.9 | 30.8 | 30.7 | 29.4 | 32.7 | 34.5 | 41.8 |
| 52 | 1245 | 24.4 | 23.3 | 22.3 | 20   | 31   | 30.9 | 30.8 | 30.7 | 29.3 | 32.5 | 33.3 | 38.9 |
| 52 | 1246 | 24.4 | 23.3 | 22.3 | 20   | 30.5 | 30.2 | 29.9 | 29.3 | 28.9 | 31.7 | 32   | 35.9 |
| 52 | 1247 | 24.4 | 23.3 | 22.6 | 20   | 30.5 | 30.2 | 29.9 | 29.3 | 28.3 | 30.2 | 30.8 | 33.2 |
| 52 | 1248 | 24.6 | 23.6 | 24.5 | 20.5 | 31   | 30.9 | 30.8 | 30.7 | 27.6 | 28.8 | 29.7 | 30.7 |
| 53 | 1249 | 25   | 24.7 | 25   | 23.9 | 31   | 30.3 | 29.6 | 28   | 27   | 28.4 | 28.8 | 32.8 |
| 53 | 1250 | 25.3 | 25.2 | 25.4 | 24.7 | 31.5 | 31   | 30.5 | 29.3 | 26.5 | 27.2 | 28.1 | 31.1 |
| 53 | 1251 | 25.5 | 25.4 | 26.1 | 25.3 | 32.5 | 32.4 | 32.3 | 32   | 26   | 26.1 | 27.4 | 29.5 |
| 53 | 1252 | 25.9 | 26   | 26.8 | 26.3 | 33   | 33.1 | 33.2 | 33.3 | 25.6 | 25.1 | 26.7 | 28.1 |
| 53 | 1253 | 26.3 | 26.6 | 27   | 27.4 | 34   | 34.5 | 35   | 36   | 25.2 | 24.3 | 26.1 | 26.6 |
| 53 | 1254 | 26.4 | 26.7 | 27.2 | 27.7 | 34   | 34.5 | 35   | 36   | 24.9 | 23.5 | 25.6 | 25.3 |
| 53 | 1255 | 26.5 | 26.8 | 27.9 | 27.9 | 34   | 34.5 | 35   | 36   | 24.6 | 22.9 | 25.2 | 24.6 |
| 53 | 1256 | 26.9 | 27.4 | 28.1 | 29   | 34   | 34.5 | 35   | 36   | 24.3 | 22.2 | 24.9 | 23.9 |
| 53 | 1257 | 27   | 27.5 | 27.7 | 29.3 | 34   | 34.5 | 35   | 36   | 24.1 | 21.7 | 24.7 | 23.5 |
| 53 | 1258 | 26.8 | 27.3 | 27.4 | 28.7 | 34   | 34.5 | 35   | 36   | 23.9 | 21.2 | 24.9 | 23.7 |
| 53 | 1259 | 26.6 | 27   | 26.8 | 28.2 | 33.5 | 33.8 | 34.1 | 34.6 | 23.8 | 21   | 25.3 | 24.7 |
| 53 | 1260 | 26.3 | 26.6 | 26.5 | 27.4 | 33.5 | 33.8 | 34.1 | 34.6 | 23.8 | 21.1 | 26.1 | 26.6 |
| 53 | 1261 | 26.1 | 26.3 | 25.9 | 26.9 | 33.5 | 33.8 | 34.1 | 34.6 | 24.1 | 21.7 | 27.5 | 29.8 |
| 53 | 1262 | 25.8 | 25.9 | 25.9 | 26.1 | 33   | 33.1 | 33.2 | 33.3 | 24.7 | 23.1 | 29.3 | 33.9 |
| 53 | 1263 | 25.8 | 25.9 | 25.2 | 26.1 | 33   | 33.1 | 33.2 | 33.3 | 25.3 | 24.5 | 28.4 | 31.9 |
| 53 | 1264 | 25.4 | 25.3 | 25   | 25   | 33   | 33.1 | 33.2 | 33.3 | 26.7 | 27.6 | 23.5 | 20.6 |
| 53 | 1265 | 25.3 | 25.2 | 24.7 | 24.7 | 32.5 | 32.4 | 32.3 | 32   | 27.2 | 28.8 | 25.3 | 24.7 |
| 53 | 1266 | 25.1 | 24.9 | 24.3 | 24.2 | 32.5 | 32.4 | 32.3 | 32   | 27.5 | 29.6 | 25.4 | 25   |
| 53 | 1267 | 24.9 | 24.6 | 24.1 | 23.7 | 32.5 | 32.4 | 32.3 | 32   | 27.9 | 30.3 | 25.1 | 24.3 |
| 53 | 1268 | 24.8 | 24.5 | 23.4 | 23.4 | 32   | 31.7 | 31.4 | 30.7 | 28.2 | 31.2 | 25.2 | 24.6 |
| 53 | 1269 | 24.4 | 23.9 | 23.4 | 22.3 | 32   | 31.7 | 31.4 | 30.7 | 28.5 | 31.7 | 24.4 | 22.7 |
| 53 | 1270 | 24.4 | 23.9 | 23.4 | 22.3 | 31.5 | 31   | 30.5 | 29.3 | 28.3 | 31.3 | 23.7 | 21   |
| 53 | 1271 | 24.4 | 23.9 | 23.6 | 22.3 | 31.5 | 31   | 30.5 | 29.3 | 27.8 | 30.2 | 23.1 | 19.7 |
| 53 | 1272 | 24.5 | 24   | 23.4 | 22.6 | 31.5 | 31   | 30.5 | 29.3 | 27.1 | 28.6 | 22.7 | 18.9 |
| 54 | 1273 | 24.8 | 24.1 | 24.7 | 21.9 | 31.5 | 31.5 | 31.6 | 31.6 | 26.5 | 26.3 | 22.5 | 17.9 |
| 54 | 1274 | 25.5 | 25.1 | 26.1 | 23.7 | 31.5 | 31.5 | 31.6 | 31.6 | 25.9 | 25   | 22.2 | 17.2 |
| 54 | 1275 | 26.3 | 26.2 | 28.1 | 25.9 | 31.5 | 31.5 | 31.6 | 31.6 | 25.4 | 23.9 | 21.9 | 16.6 |
| 54 | 1276 | 27.4 | 27.7 | 29.7 | 28.8 | 32   | 32.2 | 32.5 | 33   | 25   | 23   | 21.7 | 16.1 |
| 54 | 1277 | 28.3 | 29   | 30.6 | 31.2 | 32.5 | 32.9 | 33.4 | 34.3 | 24.7 | 22.2 | 21.3 | 15.1 |
| 54 | 1278 | 28.8 | 29.7 | 30.8 | 32.5 | 33   | 33.6 | 34.3 | 35.6 | 24.4 | 21.4 | 20.9 | 14.1 |
| 54 | 1279 | 28.9 | 29.8 | 30.8 | 32.8 | 33   | 33.6 | 34.3 | 35.6 | 24.1 | 20.7 | 20.4 | 13   |
| 54 | 1280 | 28.9 | 29.8 | 30.1 | 32.8 | 33   | 33.6 | 34.3 | 35.6 | 23.8 | 20.1 | 19.9 | 11.8 |
| 54 | 1281 | 28.5 | 29.3 | 29.2 | 31.7 | 33   | 33.6 | 34.3 | 35.6 | 23.6 | 19.7 | 19.6 | 11.3 |
| 54 | 1282 | 28   | 28.6 | 28.4 | 30.4 | 32.5 | 32.9 | 33.4 | 34.3 | 23.4 | 19.3 | 20.3 | 12.8 |
| 54 | 1283 | 27.6 | 28   | 27.9 | 29.3 | 32.5 | 32.9 | 33.4 | 34.3 | 23.4 | 19.1 | 22.1 | 17   |
| 54 | 1284 | 27.3 | 27.6 | 27   | 28.5 | 32.5 | 32.9 | 33.4 | 34.3 | 23.5 | 19.5 | 24.6 | 22.6 |
| 54 | 1285 | 26.8 | 26.9 | 26.5 | 27.2 | 32   | 32.2 | 32.5 | 33   | 24.1 | 20.8 | 27.1 | 28.4 |
| 54 | 1286 | 26.5 | 26.5 | 26.1 | 26.4 | 32   | 32.2 | 32.5 | 33   | 25.1 | 23.1 | 29.4 | 33.8 |
| 54 | 1287 | 26.3 | 26.2 | 25.4 | 25.9 | 31.5 | 31.5 | 31.6 | 31.6 | 26.8 | 27   | 31.7 | 39   |
| 54 | 1288 | 25.9 | 25.6 | 25.2 | 24.8 | 31   | 30.8 | 30.7 | 30.3 | 28.3 | 30.5 | 33.9 | 44.2 |
| 54 | 1289 | 25.8 | 25.5 | 24.7 | 24.5 | 31   | 30.8 | 30.7 | 30.3 | 29.6 | 33.4 | 35.2 | 47   |
| 54 | 1290 | 25.5 | 25.1 | 24.5 | 23.7 | 30.5 | 30.1 | 29.8 | 29   | 30.8 | 36.3 | 35.4 | 47.6 |
| 54 | 1291 | 25.4 | 24.9 | 24.3 | 23.5 | 30   | 29.4 | 28.9 | 27.6 | 31.5 | 37.9 | 34.2 | 44.9 |
| 54 | 1292 | 25.3 | 24.8 | 23.9 | 23.2 | 30   | 29.4 | 28.9 | 27.6 | 31.8 | 38.6 | 32   | 39.9 |
| 54 | 1293 | 25.1 | 24.5 | 23.6 | 22.7 | 29.5 | 28.7 | 28   | 26.3 | 30.8 | 36.2 | 29.9 | 34.8 |

|    |      |      |      |      |      |      |      |      |      |      |      |      |      |
|----|------|------|------|------|------|------|------|------|------|------|------|------|------|
| 54 | 1294 | 24.9 | 24.2 | 23.4 | 22.1 | 29.5 | 28.7 | 28   | 26.3 | 29.6 | 33.6 | 27.9 | 30.4 |
| 54 | 1295 | 24.8 | 24.1 | 23.4 | 21.9 | 29   | 28   | 27.1 | 25   | 28.7 | 31.3 | 26.2 | 26.5 |
| 54 | 1296 | 24.8 | 24.1 | 24.7 | 21.9 | 29.5 | 28.7 | 28   | 26.3 | 27.9 | 29.4 | 24.7 | 23   |
| 55 | 1297 | 25.3 | 25   | 25.6 | 24.1 | 29.5 | 29.1 | 28.6 | 27.7 | 27.3 | 29.5 | 23.5 | 26.9 |
| 55 | 1298 | 25.8 | 25.7 | 26   | 25.4 | 30   | 29.8 | 29.5 | 29   | 26.6 | 28   | 22.4 | 24.5 |
| 55 | 1299 | 26   | 26   | 26.9 | 26   | 30.5 | 30.5 | 30.4 | 30.3 | 25.9 | 26.4 | 21.6 | 22.6 |
| 55 | 1300 | 26.5 | 26.7 | 27.6 | 27.3 | 31.5 | 31.9 | 32.2 | 33   | 25.3 | 25   | 20.9 | 20.9 |
| 55 | 1301 | 26.9 | 27.3 | 28.5 | 28.4 | 32   | 32.6 | 33.1 | 34.3 | 24.7 | 23.6 | 20.2 | 19.3 |
| 55 | 1302 | 27.4 | 28   | 28.7 | 29.7 | 32   | 32.6 | 33.1 | 34.3 | 24.2 | 22.5 | 19.7 | 18.1 |
| 55 | 1303 | 27.5 | 28.1 | 29.2 | 29.9 | 32   | 32.6 | 33.1 | 34.3 | 23.8 | 21.5 | 19.3 | 17.3 |
| 55 | 1304 | 27.8 | 28.5 | 29.2 | 30.7 | 32   | 32.6 | 33.1 | 34.3 | 23.4 | 20.6 | 19   | 16.6 |
| 55 | 1305 | 27.8 | 28.5 | 28.7 | 30.7 | 32   | 32.6 | 33.1 | 34.3 | 23   | 19.8 | 19   | 16.6 |
| 55 | 1306 | 27.5 | 28.1 | 28.3 | 29.9 | 32   | 32.6 | 33.1 | 34.3 | 22.8 | 19.2 | 19.4 | 17.6 |
| 55 | 1307 | 27.3 | 27.8 | 27.4 | 29.4 | 32   | 32.6 | 33.1 | 34.3 | 22.7 | 18.9 | 19.7 | 18.1 |
| 55 | 1308 | 26.8 | 27.1 | 27.1 | 28.1 | 31.5 | 31.9 | 32.2 | 33   | 22.7 | 18.9 | 19.8 | 18.4 |
| 55 | 1309 | 26.6 | 26.8 | 26.5 | 27.6 | 31   | 31.2 | 31.3 | 31.7 | 23   | 19.6 | 20.2 | 19.3 |
| 55 | 1310 | 26.3 | 26.4 | 25.8 | 26.8 | 31   | 31.2 | 31.3 | 31.7 | 23.5 | 20.9 | 21   | 21.2 |
| 55 | 1311 | 25.9 | 25.9 | 25.6 | 25.7 | 30.5 | 30.5 | 30.4 | 30.3 | 24.4 | 23   | 21.2 | 21.7 |
| 55 | 1312 | 25.8 | 25.7 | 24.9 | 25.4 | 30.5 | 30.5 | 30.4 | 30.3 | 25.2 | 24.8 | 21.4 | 22.2 |
| 55 | 1313 | 25.4 | 25.2 | 24.5 | 24.4 | 30   | 29.8 | 29.5 | 29   | 26.3 | 27.2 | 21.8 | 23   |
| 55 | 1314 | 25.2 | 24.9 | 24   | 23.8 | 30   | 29.8 | 29.5 | 29   | 27.5 | 30   | 22.2 | 23.9 |
| 55 | 1315 | 24.9 | 24.5 | 23.5 | 23   | 29.5 | 29.1 | 28.6 | 27.7 | 28.7 | 32.8 | 22.3 | 24.2 |
| 55 | 1316 | 24.6 | 24   | 23.1 | 22.2 | 29.5 | 29.1 | 28.6 | 27.7 | 29.3 | 34.1 | 22.4 | 24.5 |
| 55 | 1317 | 24.4 | 23.8 | 22.7 | 21.7 | 29   | 28.4 | 27.7 | 26.3 | 29.3 | 34.1 | 22.1 | 23.6 |
| 55 | 1318 | 24.2 | 23.5 | 22.6 | 21.2 | 29   | 28.4 | 27.7 | 26.3 | 28.8 | 33   | 21.4 | 22   |
| 55 | 1319 | 24.1 | 23.3 | 23.5 | 20.9 | 28.5 | 27.7 | 26.8 | 25   | 28   | 31.3 | 20.5 | 20   |
| 55 | 1320 | 24.6 | 24   | 24   | 22.2 | 29   | 28.4 | 27.7 | 26.3 | 27.3 | 29.5 | 19.7 | 18.3 |
| 56 | 1321 | 25   | 24.5 | 25.6 | 22.9 |      | 28.7 | 28.3 | 27.6 | 26.6 | 31.8 | 19   | 16.6 |
| 56 | 1322 | 25.9 | 25.8 | 27.2 | 25.3 |      | 29.4 | 29.2 | 28.9 | 26.1 | 30.6 | 18.5 | 15.3 |
| 56 | 1323 | 26.8 | 27   | 29   | 27.7 |      | 30.8 | 31   | 31.6 | 22.8 | 23.2 | 18.2 | 14.6 |
| 56 | 1324 | 27.8 | 28.4 | 30.5 | 30.3 |      | 31.5 | 31.9 | 32.9 | 21.8 | 20.7 | 18   | 14.2 |
| 56 | 1325 | 28.6 | 29.5 | 31.4 | 32.5 |      | 32.2 | 32.8 | 34.3 | 21.5 | 20   | 17.8 | 13.7 |
| 56 | 1326 | 29.1 | 30.2 | 31.7 | 33.8 |      | 32.9 | 33.7 | 35.6 | 21.1 | 19.2 | 17.8 | 13.7 |
| 56 | 1327 | 29.3 | 30.5 | 31.5 | 34.3 |      | 32.9 | 33.7 | 35.6 | 20.7 | 18.2 | 17.8 | 13.7 |
| 56 | 1328 | 29.2 | 30.4 | 30.3 | 34.1 |      | 32.2 | 32.8 | 34.3 | 20.2 | 17   | 17.9 | 14   |
| 56 | 1329 | 28.5 | 29.4 | 29.4 | 32.2 |      | 32.2 | 32.8 | 34.3 | 20   | 16.5 | 18   | 14.2 |
| 56 | 1330 | 28   | 28.7 | 28.5 | 30.9 |      | 31.5 | 31.9 | 32.9 | 19.7 | 16   | 18.9 | 16.3 |
| 56 | 1331 | 27.5 | 28   | 27.8 | 29.5 |      | 31.5 | 31.9 | 32.9 | 19.5 | 15.5 | 20.6 | 20.1 |
| 56 | 1332 | 27.1 | 27.4 | 27.2 | 28.5 |      | 30.8 | 31   | 31.6 | 19.5 | 15.5 | 20.9 | 20.9 |
| 56 | 1333 | 26.8 | 27   | 26.3 | 27.7 |      | 30.8 | 31   | 31.6 | 20.4 | 17.5 | 21.9 | 23.1 |
| 56 | 1334 | 26.3 | 26.3 | 25.6 | 26.3 |      | 30.1 | 30.1 | 30.3 | 20.8 | 18.4 | 22.8 | 25.3 |
| 56 | 1335 | 25.9 | 25.8 | 24.7 | 25.3 |      | 30.1 | 30.1 | 30.3 | 21.4 | 19.9 | 22.4 | 24.4 |
| 56 | 1336 | 25.4 | 25.1 | 24   | 23.9 |      | 29.4 | 29.2 | 28.9 | 23.3 | 24.3 | 24.9 | 30   |
| 56 | 1337 | 25   | 24.5 | 23.8 | 22.9 |      | 28.7 | 28.3 | 27.6 | 24.8 | 27.7 | 26.3 | 33.3 |
| 56 | 1338 | 24.9 | 24.4 | 22.9 | 22.6 |      | 28.7 | 28.3 | 27.6 | 25.2 | 28.6 | 25.9 | 32.4 |
| 56 | 1339 | 24.4 | 23.7 | 22.7 | 21.3 |      | 28   | 27.4 | 26.3 | 25.6 | 29.4 | 25.3 | 31   |
| 56 | 1340 | 24.3 | 23.5 | 22   | 21   |      | 27.3 | 26.5 | 25   | 25.6 | 29.6 | 23.7 | 27.4 |
| 56 | 1341 | 23.9 | 23   | 21.3 | 20   |      | 27.3 | 26.5 | 25   | 25.5 | 29.3 | 22.6 | 24.8 |
| 56 | 1342 | 23.5 | 22.4 | 21.3 | 18.9 |      | 26.6 | 25.6 | 23.6 | 24.9 | 27.9 | 21.7 | 22.7 |
| 56 | 1343 | 23.5 | 22.4 | 22   | 18.9 |      | 26.6 | 25.6 | 23.6 | 24.2 | 26.3 | 20.9 | 20.8 |
| 56 | 1344 | 23.9 | 23   | 23.3 | 20   |      | 26.6 | 25.6 | 23.6 | 23.4 | 24.4 | 20.2 | 19.2 |
| 57 | 1345 | 24.6 | 23.9 | 24.7 | 21.8 |      | 27.6 | 27.1 | 26.1 | 22.7 | 21.5 | 19.5 | 20.2 |
| 57 | 1346 | 25.4 | 25.1 | 26.5 | 23.9 |      | 28.3 | 28   | 27.5 | 22.1 | 20.1 | 18.9 | 19   |
| 57 | 1347 | 26.4 | 26.5 | 28.1 | 26.6 |      | 29   | 28.9 | 28.8 | 21.6 | 18.9 | 18.3 | 17.5 |
| 57 | 1348 | 27.3 | 27.7 | 29.4 | 29   |      | 30.4 | 30.7 | 31.5 | 21.1 | 17.7 | 17.6 | 15.9 |
| 57 | 1349 | 28   | 28.7 | 30.3 | 30.9 |      | 31.1 | 31.6 | 32.8 | 20.7 | 16.8 | 17   | 14.5 |
| 57 | 1350 | 28.5 | 29.4 | 30.8 | 32.2 |      | 31.1 | 31.6 | 32.8 | 20.4 | 16.1 | 16.4 | 13.2 |
| 57 | 1351 | 28.8 | 29.8 | 30.8 | 33   |      | 31.8 | 32.5 | 34.1 | 20.1 | 15.5 | 15.9 | 12   |
| 57 | 1352 | 28.8 | 29.8 | 29.9 | 33   |      | 31.1 | 31.6 | 32.8 | 19.8 | 14.8 | 15.8 | 11.8 |
| 57 | 1353 | 28.3 | 29.1 | 29   | 31.7 |      | 31.1 | 31.6 | 32.8 | 19.5 | 14.2 | 15.9 | 12   |
| 57 | 1354 | 27.8 | 28.4 | 28.1 | 30.3 |      | 31.1 | 31.6 | 32.8 | 19.3 | 13.6 | 16.2 | 12.8 |
| 57 | 1355 | 27.3 | 27.7 | 27.8 | 29   |      | 30.4 | 30.7 | 31.5 | 19.1 | 13.2 | 16.7 | 13.9 |
| 57 | 1356 | 27.1 | 27.4 | 27.2 | 28.5 |      | 30.4 | 30.7 | 31.5 | 19.5 | 14   | 17.7 | 16.2 |
| 57 | 1357 | 26.8 | 27   | 26.5 | 27.7 |      | 29.7 | 29.8 | 30.1 | 21.1 | 17.7 | 18.5 | 18.1 |
| 57 | 1358 | 26.4 | 26.5 | 25.8 | 26.6 |      | 29.7 | 29.8 | 30.1 | 22.8 | 21.8 | 19.6 | 20.4 |



|    |      |      |      |      |      |  |      |      |      |      |      |      |      |
|----|------|------|------|------|------|--|------|------|------|------|------|------|------|
| 57 | 1359 | 26   | 25.9 | 25.4 | 25.5 |  | 29   | 28.9 | 28.8 | 24.6 | 25.9 | 21.9 | 25.7 |
| 57 | 1360 | 25.8 | 25.6 | 24.7 | 25   |  | 29   | 28.9 | 28.8 | 26.4 | 29.9 | 22.9 | 28   |
| 57 | 1361 | 25.4 | 25.1 | 24.5 | 23.9 |  | 28.3 | 28   | 27.5 | 27.8 | 33.3 | 22.7 | 27.7 |
| 57 | 1362 | 25.3 | 24.9 | 23.8 | 23.7 |  | 28.3 | 28   | 27.5 | 28.8 | 35.6 | 22.1 | 26.1 |
| 57 | 1363 | 24.9 | 24.4 | 23.1 | 22.6 |  | 27.6 | 27.1 | 26.1 | 29.3 | 36.8 | 21.6 | 25.1 |
| 57 | 1364 | 24.5 | 23.8 | 22.9 | 21.6 |  | 27.6 | 27.1 | 26.1 | 29.4 | 36.8 | 20.8 | 23.3 |
| 57 | 1365 | 24.4 | 23.7 | 22.4 | 21.3 |  | 26.9 | 26.2 | 24.8 | 28.9 | 35.7 | 20.2 | 22   |
| 57 | 1366 | 24.1 | 23.2 | 22.4 | 20.5 |  | 26.9 | 26.2 | 24.8 | 28   | 33.8 | 19.7 | 20.7 |
| 57 | 1367 | 24.1 | 23.2 | 23.3 | 20.5 |  | 26.9 | 26.2 | 24.8 | 27.1 | 31.6 | 19.2 | 19.5 |
| 57 | 1368 | 24.6 | 23.9 | 23.4 | 21.8 |  | 26.9 | 26.2 | 24.8 | 26.1 | 29.4 | 18.5 | 17.9 |
| 58 | 1369 | 25   | 24.2 | 25   | 21.7 |  | 27.5 | 27.4 |      | 25.3 | 24.9 | 17.7 | 12.1 |
| 58 | 1370 | 25.9 | 25.5 | 27.2 | 24.1 |  | 27.5 | 27.4 |      | 24.5 | 23.2 | 17   | 10.4 |
| 58 | 1371 | 27.1 | 27.2 | 29.2 | 27.3 |  | 27.5 | 27.4 |      | 23.9 | 21.8 | 16.4 | 8.9  |
| 58 | 1372 | 28.2 | 28.7 | 30.6 | 30.2 |  | 27.5 | 27.4 |      | 23.4 | 20.6 | 15.8 | 7.7  |
| 58 | 1373 | 29   | 29.8 | 32.1 | 32.4 |  | 27.5 | 27.4 |      | 22.9 | 19.4 | 15.2 | 6.4  |
| 58 | 1374 | 29.8 | 30.9 | 32.1 | 34.5 |  | 28.2 | 28.3 |      | 22.4 | 18.4 | 14.9 | 5.5  |
| 58 | 1375 | 29.8 | 30.9 | 31.9 | 34.5 |  | 28.2 | 28.3 |      | 22   | 17.4 | 14.5 | 4.6  |
| 58 | 1376 | 29.7 | 30.8 | 30.6 | 34.2 |  | 28.2 | 28.3 |      | 21.6 | 16.5 | 14.2 | 4.1  |
| 58 | 1377 | 29   | 29.8 | 30.3 | 32.4 |  | 28.2 | 28.3 |      | 21.3 | 15.8 | 14.3 | 4.2  |
| 58 | 1378 | 28.8 | 29.5 | 29.4 | 31.8 |  | 28.2 | 28.3 |      | 21   | 15.2 | 15.3 | 6.5  |
| 58 | 1379 | 28.3 | 28.8 | 28.5 | 30.5 |  | 28.2 | 28.3 |      | 20.9 | 14.9 | 17.8 | 12.3 |
| 58 | 1380 | 27.8 | 28.1 | 27.7 | 29.2 |  | 28.2 | 28.3 |      | 21.2 | 15.5 | 21.1 | 19.9 |
| 58 | 1381 | 27.4 | 27.6 | 27   | 28.1 |  | 28.2 | 28.3 |      | 22.7 | 19   | 24.4 | 27.5 |
| 58 | 1382 | 27   | 27   | 26.7 | 27   |  | 28.2 | 28.3 |      | 24.6 | 23.4 | 26.9 | 33.1 |
| 58 | 1383 | 26.8 | 26.7 | 25.9 | 26.5 |  | 28.2 | 28.3 |      | 26.6 | 28   | 28.9 | 37.7 |
| 58 | 1384 | 26.4 | 26.2 | 25   | 25.4 |  | 27.5 | 27.4 |      | 28.4 | 32.2 | 30   | 40.3 |
| 58 | 1385 | 25.9 | 25.5 | 24.9 | 24.1 |  | 27.5 | 27.4 |      | 29.9 | 35.7 | 31.5 | 43.9 |
| 58 | 1386 | 25.8 | 25.3 | 24.1 | 23.8 |  | 27.5 | 27.4 |      | 30.4 | 36.8 | 31.8 | 44.5 |
| 58 | 1387 | 25.4 | 24.8 | 23.8 | 22.8 |  | 27.5 | 27.4 |      | 31   | 38.2 | 30.7 | 41.9 |
| 58 | 1388 | 25.2 | 24.5 | 23.2 | 22.3 |  | 26.8 | 26.5 |      | 31.1 | 38.3 | 29.3 | 38.7 |
| 58 | 1389 | 24.9 | 24.1 | 22.7 | 21.5 |  | 26.8 | 26.5 |      | 30.6 | 37.2 | 27.7 | 35.1 |
| 58 | 1390 | 24.6 | 23.7 | 22.7 | 20.7 |  | 26.8 | 26.5 |      | 29.8 | 35.3 | 26.1 | 31.4 |
| 58 | 1391 | 24.6 | 23.7 | 23.4 | 20.7 |  | 26.8 | 26.5 |      | 28.8 | 33.1 | 24.6 | 27.8 |
| 58 | 1392 | 25   | 24.2 | 24.1 | 21.7 |  | 26.8 | 26.5 |      | 27.9 | 30.9 | 23.3 | 24.9 |
| 59 | 1393 | 25.5 | 24.8 | 25.5 | 22.5 |  | 26.7 | 26.4 |      | 27   | 27.1 | 22.2 | 21.5 |
| 59 | 1394 | 26.3 | 25.9 | 27.7 | 24.6 |  | 26.7 | 26.4 |      | 26.3 | 25.4 | 21.3 | 19.5 |
| 59 | 1395 | 27.5 | 27.6 | 29.1 | 27.8 |  | 27.4 | 27.3 |      | 25.6 | 23.8 | 20.6 | 17.8 |
| 59 | 1396 | 28.3 | 28.7 | 30   | 29.9 |  | 28.8 | 29.1 |      | 25   | 22.5 | 19.9 | 16.2 |
| 59 | 1397 | 28.8 | 29.4 | 30.9 | 31.3 |  | 29.5 | 30   |      | 24.5 | 21.2 | 19.4 | 15.1 |
| 59 | 1398 | 29.3 | 30.1 | 31.1 | 32.6 |  | 30.2 | 30.9 |      | 24   | 20.1 | 18.9 | 13.9 |
| 59 | 1399 | 29.4 | 30.2 | 31.1 | 32.9 |  | 30.2 | 30.9 |      | 23.5 | 19   | 18.4 | 12.8 |
| 59 | 1400 | 29.4 | 30.2 | 30.9 | 32.9 |  | 30.2 | 30.9 |      | 23.1 | 18.1 | 17.9 | 11.8 |
| 59 | 1401 | 29.3 | 30.1 | 30.4 | 32.6 |  | 30.2 | 30.9 |      | 22.7 | 17.2 | 18   | 11.9 |
| 59 | 1402 | 29   | 29.7 | 30   | 31.8 |  | 29.5 | 30   |      | 22.4 | 16.5 | 18.6 | 13.3 |
| 59 | 1403 | 28.8 | 29.4 | 29.1 | 31.3 |  | 29.5 | 30   |      | 22.3 | 16.2 | 19.5 | 15.4 |
| 59 | 1404 | 28.3 | 28.7 | 28.4 | 29.9 |  | 28.8 | 29.1 |      | 22.5 | 16.7 | 21.7 | 20.5 |
| 59 | 1405 | 27.9 | 28.1 | 27.8 | 28.9 |  | 28.8 | 29.1 |      | 23.9 | 19.9 | 24.6 | 27.1 |
| 59 | 1406 | 27.6 | 27.7 | 27.3 | 28.1 |  | 28.1 | 28.2 |      | 25.7 | 24.2 | 26.2 | 30.9 |
| 59 | 1407 | 27.3 | 27.3 | 26.6 | 27.3 |  | 28.1 | 28.2 |      | 27.7 | 28.7 | 26.8 | 32.2 |
| 59 | 1408 | 26.9 | 26.7 | 26.2 | 26.2 |  | 27.4 | 27.3 |      | 29.6 | 33.1 | 26.9 | 32.3 |
| 59 | 1409 | 26.7 | 26.5 | 25.7 | 25.7 |  | 27.4 | 27.3 |      | 31.1 | 36.6 | 27.1 | 32.9 |
| 59 | 1410 | 26.4 | 26   | 24.8 | 24.9 |  | 26.7 | 26.4 |      | 32.1 | 38.8 | 27.5 | 33.8 |
| 59 | 1411 | 25.9 | 25.3 | 24.6 | 23.6 |  | 26.7 | 26.4 |      | 32.6 | 40   | 26.6 | 31.6 |
| 59 | 1412 | 25.8 | 25.2 | 23.9 | 23.3 |  | 26   | 25.5 |      | 32.5 | 39.7 | 25.9 | 30   |
| 59 | 1413 | 25.4 | 24.6 | 23.7 | 22.2 |  | 25.3 | 24.6 |      | 32   | 38.5 | 25.3 | 28.7 |
| 59 | 1414 | 25.3 | 24.5 | 23.2 | 22   |  | 25.3 | 24.6 |      | 31.2 | 36.6 | 24.4 | 26.7 |
| 59 | 1415 | 25   | 24.1 | 23.7 | 21.2 |  | 25.3 | 24.6 |      | 30.1 | 34.2 | 23.6 | 24.8 |
| 59 | 1416 | 25.3 | 24.5 | 24.7 | 22   |  | 25.3 | 24.6 |      | 29.1 | 31.9 | 22.9 | 23.3 |
| 60 | 1417 | 25.8 | 25.3 | 26   | 23.6 |  | 25.4 | 24.7 |      | 28.2 | 29.1 | 21.9 | 22.5 |
| 60 | 1418 | 26.5 | 26.2 | 27.6 | 25.5 |  | 26.1 | 25.6 |      | 27.4 | 27.2 | 20.7 | 19.8 |
| 60 | 1419 | 27.4 | 27.5 | 29.6 | 27.8 |  | 26.8 | 26.5 |      | 26.7 | 25.7 | 20.2 | 18.6 |
| 60 | 1420 | 28.5 | 29   | 31   | 30.8 |  | 28.2 | 28.3 |      | 26.1 | 24.3 | 19.9 | 17.9 |
| 60 | 1421 | 29.3 | 30.2 | 31.9 | 32.9 |  | 28.9 | 29.2 |      | 25.6 | 23   | 19.7 | 17.4 |
| 60 | 1422 | 29.8 | 30.9 | 31.9 | 34.2 |  | 29.6 | 30.1 |      | 25.1 | 21.9 | 19.4 | 16.8 |
| 60 | 1423 | 29.8 | 30.9 | 31.8 | 34.2 |  | 29.6 | 30.1 |      | 24.6 | 20.8 | 19.1 | 16.1 |

|    |      |      |      |      |      |  |      |      |  |      |      |      |      |
|----|------|------|------|------|------|--|------|------|--|------|------|------|------|
| 60 | 1424 | 29.7 | 30.7 | 31   | 34   |  | 29.6 | 30.1 |  | 24.2 | 19.8 | 18.7 | 15   |
| 60 | 1425 | 29.3 | 30.2 | 30.1 | 32.9 |  | 28.9 | 29.2 |  | 23.7 | 18.8 | 18.5 | 14.8 |
| 60 | 1426 | 28.8 | 29.5 | 29.2 | 31.6 |  | 28.9 | 29.2 |  | 23.4 | 17.9 | 19.2 | 16.2 |
| 60 | 1427 | 28.3 | 28.8 | 28.5 | 30.2 |  | 28.9 | 29.2 |  | 23.1 | 17.4 | 20.1 | 18.2 |
| 60 | 1428 | 27.9 | 28.2 | 27.8 | 29.2 |  | 28.2 | 28.3 |  | 23.3 | 17.8 | 21.1 | 20.7 |
| 60 | 1429 | 27.5 | 27.6 | 27.4 | 28.1 |  | 28.2 | 28.3 |  | 24.7 | 21   | 22.7 | 24.3 |
| 60 | 1430 | 27.3 | 27.4 | 26.5 | 27.6 |  | 28.2 | 28.3 |  | 26.5 | 25.1 | 23.9 | 27   |
| 60 | 1431 | 26.8 | 26.7 | 25.8 | 26.3 |  | 27.5 | 27.4 |  | 28.3 | 29.3 | 24.7 | 28.9 |
| 60 | 1432 | 26.4 | 26.1 | 25.3 | 25.2 |  | 27.5 | 27.4 |  | 30   | 33.2 | 24.4 | 28.3 |
| 60 | 1433 | 26.1 | 25.7 | 24.9 | 24.4 |  | 27.5 | 27.4 |  | 31.3 | 36.2 | 23.9 | 27.1 |
| 60 | 1434 | 25.9 | 25.4 | 24   | 23.9 |  | 26.8 | 26.5 |  | 32.3 | 38.4 | 23.7 | 26.6 |
| 60 | 1435 | 25.4 | 24.7 | 23.8 | 22.5 |  | 26.8 | 26.5 |  | 32.5 | 39   | 23.8 | 26.8 |
| 60 | 1436 | 25.3 | 24.6 | 23.1 | 22.3 |  | 26.8 | 26.5 |  | 32.4 | 38.7 | 23.4 | 26   |
| 60 | 1437 | 24.9 | 24   | 22.9 | 21.2 |  | 26.8 | 26.5 |  | 31.8 | 37.3 | 22.6 | 24   |
| 60 | 1438 | 24.8 | 23.9 | 22.9 | 20.9 |  | 26.1 | 25.6 |  | 30.8 | 35.2 | 21.9 | 22.4 |
| 60 | 1439 | 24.8 | 23.9 | 22.9 | 20.9 |  | 26.1 | 25.6 |  | 29.9 | 33   | 21.1 | 20.7 |
| 60 | 1440 | 24.8 | 23.9 | 24.4 | 20.9 |  | 26.1 | 25.6 |  | 29   | 30.9 | 20.5 | 19.2 |
| 61 | 1441 | 24.8 | 24.6 | 24.7 | 23.9 |  | 26.8 | 26.6 |  | 28.2 | 31.1 | 20.1 | 16   |
| 61 | 1442 | 25   | 24.9 | 24.9 | 24.4 |  | 26.8 | 26.6 |  | 27.6 | 29.6 | 19.7 | 15.3 |
| 61 | 1443 | 25.1 | 25   | 24.9 | 24.7 |  | 27.5 | 27.5 |  | 27.1 | 28.5 | 19.4 | 14.4 |
| 61 | 1444 | 25.1 | 25   | 25.3 | 24.7 |  | 27.5 | 27.5 |  | 26.6 | 27.5 | 18.9 | 13.4 |
| 61 | 1445 | 25.3 | 25.3 | 26.2 | 25.2 |  | 28.2 | 28.4 |  | 26.2 | 26.6 | 18.5 | 12.4 |
| 61 | 1446 | 25.8 | 26   | 26.5 | 26.6 |  | 28.2 | 28.4 |  | 25.9 | 25.8 | 18   | 11.2 |
| 61 | 1447 | 26   | 26.3 | 26.7 | 27.1 |  | 28.2 | 28.4 |  | 25.5 | 24.9 | 17.6 | 10.4 |
| 61 | 1448 | 26.1 | 26.4 | 27.1 | 27.4 |  | 28.2 | 28.4 |  | 25.2 | 24.1 | 17.4 | 9.8  |
| 61 | 1449 | 26.3 | 26.7 | 26.7 | 27.9 |  | 28.2 | 28.4 |  | 24.7 | 23.1 | 17.4 | 9.9  |
| 61 | 1450 | 26.1 | 26.4 | 26.7 | 27.4 |  | 28.2 | 28.4 |  | 24.4 | 22.3 | 17.7 | 10.7 |
| 61 | 1451 | 26.1 | 26.4 | 26.2 | 27.4 |  | 28.2 | 28.4 |  | 24.4 | 22.3 | 18.4 | 12.2 |
| 61 | 1452 | 25.8 | 26   | 26.2 | 26.6 |  | 28.2 | 28.4 |  | 24.5 | 22.7 | 20.6 | 17.3 |
| 61 | 1453 | 25.8 | 26   | 25.6 | 26.6 |  |      | 28.4 |  | 25.1 | 24   | 23.8 | 24.6 |
| 61 | 1454 | 25.5 | 25.6 | 25.3 | 25.8 |  |      | 28.4 |  | 25.7 | 25.4 | 26.6 | 31.1 |
| 61 | 1455 | 25.3 | 25.3 | 25.3 | 25.2 |  |      | 28.4 |  | 27.1 | 28.6 | 27.9 | 34   |
| 61 | 1456 | 25.3 | 25.3 | 24.9 | 25.2 |  |      | 27.5 |  | 28.2 | 31.1 | 29.7 | 38.1 |
| 61 | 1457 | 25.1 | 25   | 24.5 | 24.7 |  |      | 27.5 |  | 28.9 | 32.7 | 31.4 | 42.1 |
| 61 | 1458 | 24.9 | 24.7 | 24.5 | 24.2 |  |      | 27.5 |  | 28.5 | 31.8 | 32.1 | 43.7 |
| 61 | 1459 | 24.9 | 24.7 | 24.4 | 24.2 |  |      | 26.6 |  | 28.1 | 30.9 | 31.2 | 41.6 |
| 61 | 1460 | 24.8 | 24.6 | 24.4 | 23.9 |  |      | 26.6 |  | 26.3 | 26.8 | 29.7 | 38.1 |
| 61 | 1461 | 24.8 | 24.6 | 24.4 | 23.9 |  |      | 26.6 |  | 24.5 | 22.7 | 27.6 | 33.4 |
| 61 | 1462 | 24.8 | 24.6 | 24.4 | 23.9 |  |      | 25.7 |  | 24.3 | 22.1 | 25.8 | 29.2 |
| 61 | 1463 | 24.8 | 24.6 | 24.4 | 23.9 |  |      | 25.7 |  | 24   | 21.5 | 24.1 | 25.3 |
| 61 | 1464 | 24.8 | 24.6 | 22.6 | 23.9 |  |      | 25.7 |  | 23.7 | 20.8 | 22.7 | 22   |
| 62 | 1465 | 24.8 | 23.7 | 22.9 | 20.2 |  |      |      |  | 23.4 | 22.2 | 21.4 | 17   |
| 62 | 1466 | 25   | 24   | 24.6 | 20.7 |  |      |      |  | 23.1 | 21.6 | 20.4 | 14.6 |
| 62 | 1467 | 25.9 | 25.2 | 27.1 | 23.1 |  |      |      |  | 22.9 | 21.1 | 19.4 | 12.4 |
| 62 | 1468 | 27.3 | 27.2 | 29.2 | 26.9 |  |      |      |  | 22.7 | 20.6 | 18.6 | 10.5 |
| 62 | 1469 | 28.5 | 28.9 | 30.7 | 30   |  |      |      |  | 22.5 | 20   | 17.9 | 8.9  |
| 62 | 1470 | 29.3 | 30   | 30.7 | 32.2 |  |      |      |  | 22.1 | 19.3 | 17.3 | 7.5  |
| 62 | 1471 | 29.3 | 30   | 30.9 | 32.2 |  |      |      |  | 21.8 | 18.4 | 16.7 | 6.2  |
| 62 | 1472 | 29.4 | 30.1 | 30.9 | 32.4 |  |      |      |  | 21.4 | 17.7 | 16.3 | 5.2  |
| 62 | 1473 | 29.4 | 30.1 | 30.5 | 32.4 |  |      |      |  | 21.2 | 17.1 | 16.1 | 4.8  |
| 62 | 1474 | 29.2 | 29.9 | 30.1 | 31.9 |  |      |      |  | 20.9 | 16.5 | 16.9 | 6.6  |
| 62 | 1475 | 29   | 29.6 | 29.8 | 31.4 |  |      |      |  | 20.9 | 16.3 | 19.2 | 12   |
| 62 | 1476 | 28.8 | 29.3 | 28.9 | 30.8 |  |      |      |  | 21.1 | 16.9 | 22.8 | 20.2 |
| 62 | 1477 | 28.3 | 28.6 | 28.5 | 29.5 |  |      |      |  | 22.4 | 19.9 | 26.9 | 29.5 |
| 62 | 1478 | 28.1 | 28.3 | 28   | 29   |  |      |      |  | 24.1 | 23.8 | 30.2 | 37.3 |
| 62 | 1479 | 27.8 | 27.9 | 27.4 | 28.2 |  |      |      |  | 25.8 | 27.7 | 32.9 | 43.3 |
| 62 | 1480 | 27.5 | 27.5 | 27.1 | 27.4 |  |      |      |  | 27.2 | 31   | 34.4 | 46.9 |
| 62 | 1481 | 27.3 | 27.2 | 26.7 | 26.9 |  |      |      |  | 28.4 | 33.7 | 35.5 | 49.5 |
| 62 | 1482 | 27.1 | 26.9 | 26.4 | 26.3 |  |      |      |  | 29.4 | 35.9 | 35.7 | 49.9 |
| 62 | 1483 | 26.9 | 26.6 | 26.2 | 25.8 |  |      |      |  | 29.9 | 37   | 34.4 | 46.9 |
| 62 | 1484 | 26.8 | 26.5 | 25.8 | 25.5 |  |      |      |  | 29.1 | 35.4 | 32.7 | 42.9 |
| 62 | 1485 | 26.6 | 26.2 | 25.5 | 25   |  |      |      |  | 28.3 | 33.6 | 30.4 | 37.7 |
| 62 | 1486 | 26.4 | 25.9 | 25.3 | 24.5 |  |      |      |  | 26.3 | 28.9 | 28.4 | 33   |
| 62 | 1487 | 26.3 | 25.8 | 25.8 | 24.2 |  |      |      |  | 25.1 | 26.1 | 26.4 | 28.5 |
| 62 | 1488 | 26.6 | 26.2 | 26.1 | 25   |  |      |      |  | 24.1 | 23.7 | 24.8 | 24.8 |

|    |      |      |      |      |      |  |  |  |  |      |      |      |      |
|----|------|------|------|------|------|--|--|--|--|------|------|------|------|
| 63 | 1489 | 26.6 | 26.4 | 26.9 | 25.6 |  |  |  |  | 23.4 | 24   | 23.4 | 21.7 |
| 63 | 1490 | 27   | 26.9 | 27.6 | 26.7 |  |  |  |  | 22.8 | 22.7 | 22.2 | 19   |
| 63 | 1491 | 27.4 | 27.5 | 27.8 | 27.8 |  |  |  |  | 22.3 | 21.4 | 21.2 | 16.6 |
| 63 | 1492 | 27.5 | 27.6 | 28.5 | 28   |  |  |  |  | 21.5 | 19.8 | 20.2 | 14.5 |
| 63 | 1493 | 27.9 | 28.2 | 28.7 | 29.1 |  |  |  |  | 20.9 | 18.4 | 19.5 | 12.8 |
| 63 | 1494 | 28   | 28.3 | 29.4 | 29.4 |  |  |  |  | 20.4 | 17.2 | 18.8 | 11.2 |
| 63 | 1495 | 28.4 | 28.9 | 29.4 | 30.4 |  |  |  |  | 20   | 16.2 | 18.2 | 9.7  |
| 63 | 1496 | 28.4 | 28.9 | 29.2 | 30.4 |  |  |  |  | 19.5 | 15.2 | 17.6 | 8.4  |
| 63 | 1497 | 28.3 | 28.7 | 28.8 | 30.2 |  |  |  |  | 19.1 | 14.2 | 17.3 | 7.7  |
| 63 | 1498 | 28.1 | 28.5 | 28.7 | 29.6 |  |  |  |  | 18.8 | 13.4 | 17.8 | 8.9  |
| 63 | 1499 | 28   | 28.3 | 28.3 | 29.4 |  |  |  |  | 18.5 | 12.8 | 19.6 | 13.1 |
| 63 | 1500 | 27.8 | 28   | 27.9 | 28.8 |  |  |  |  | 18.5 | 12.9 | 23.1 | 21   |
| 63 | 1501 | 27.6 | 27.8 | 27.4 | 28.3 |  |  |  |  | 19.7 | 15.5 | 26.8 | 29.6 |
| 63 | 1502 | 27.3 | 27.3 | 27   | 27.5 |  |  |  |  | 21.4 | 19.5 | 29.7 | 36.2 |
| 63 | 1503 | 27.1 | 27.1 | 26.7 | 27   |  |  |  |  | 23.4 | 24   | 30.9 | 38.9 |
| 63 | 1504 | 26.9 | 26.8 | 26.5 | 26.4 |  |  |  |  | 25.2 | 28.2 | 31.5 | 40.5 |
| 63 | 1505 | 26.8 | 26.6 | 26.1 | 26.2 |  |  |  |  | 26.6 | 31.5 | 32   | 41.7 |
| 63 | 1506 | 26.6 | 26.4 | 25.8 | 25.6 |  |  |  |  | 27.6 | 33.8 | 32.5 | 42.8 |
| 63 | 1507 | 26.4 | 26.1 | 25.6 | 25.1 |  |  |  |  | 28.1 | 34.9 | 31.9 | 41.2 |
| 63 | 1508 | 26.3 | 25.9 | 25.2 | 24.8 |  |  |  |  | 28.1 | 34.8 | 30.7 | 38.5 |
| 63 | 1509 | 26.1 | 25.7 | 24.9 | 24.3 |  |  |  |  | 27.5 | 33.5 | 29.2 | 35.2 |
| 63 | 1510 | 25.9 | 25.4 | 24.7 | 23.8 |  |  |  |  | 26.4 | 31   | 27.3 | 30.7 |
| 63 | 1511 | 25.8 | 25.2 | 25.2 | 23.5 |  |  |  |  | 25.3 | 28.4 | 25.8 | 27.3 |
| 63 | 1512 | 26.1 | 25.7 | 26   | 24.3 |  |  |  |  | 24.3 | 26.2 | 24.7 | 24.7 |
| 64 | 1513 | 26.9 | 26.5 | 27.6 | 25.1 |  |  |  |  | 23.2 | 23.7 | 23.7 | 21.9 |
| 64 | 1514 | 27.8 | 27.7 | 29.4 | 27.5 |  |  |  |  | 22.3 | 21.7 | 22.9 | 20.2 |
| 64 | 1515 | 28.8 | 29.1 | 31.2 | 30.1 |  |  |  |  | 21.6 | 20.1 | 22.2 | 18.6 |
| 64 | 1516 | 29.8 | 30.5 | 33.2 | 32.8 |  |  |  |  | 21.1 | 18.9 | 21.6 | 17   |
| 64 | 1517 | 30.9 | 32.1 | 34.3 | 35.7 |  |  |  |  | 20.7 | 17.9 | 21   | 15.7 |
| 64 | 1518 | 31.5 | 32.9 | 34.3 | 37.3 |  |  |  |  | 20.2 | 16.9 | 20.4 | 14.4 |
| 64 | 1519 | 31.5 | 32.9 | 34.1 | 37.3 |  |  |  |  | 19.8 | 15.9 | 20.1 | 13.7 |
| 64 | 1520 | 31.4 | 32.8 | 33.4 | 37   |  |  |  |  | 19.3 | 14.9 | 19.9 | 13.3 |
| 64 | 1521 | 31   | 32.2 | 32.5 | 36   |  |  |  |  | 18.9 | 14   | 19.9 | 13.2 |
| 64 | 1522 | 30.5 | 31.5 | 31.8 | 34.7 |  |  |  |  | 18.6 | 13.1 | 20.2 | 14   |
| 64 | 1523 | 30.1 | 30.9 | 27.5 | 33.6 |  |  |  |  | 18.5 | 12.9 | 20.7 | 15.2 |
| 64 | 1524 | 27.7 | 27.6 | 22.8 | 27.2 |  |  |  |  | 18.6 | 13.3 | 22.1 | 18.3 |
| 64 | 1525 | 25.1 | 23.9 | 26   | 20.3 |  |  |  |  | 19.7 | 15.8 | 24.5 | 23.8 |
| 64 | 1526 | 26.9 | 26.5 | 26   | 25.1 |  |  |  |  | 21.7 | 20.3 | 26.8 | 29.1 |
| 64 | 1527 | 26.9 | 26.5 | 25.8 | 25.1 |  |  |  |  | 23.6 | 24.7 | 28.5 | 33   |
| 64 | 1528 | 26.8 | 26.3 | 25.3 | 24.8 |  |  |  |  | 25.3 | 28.7 | 31.1 | 39   |
| 64 | 1529 | 26.5 | 25.9 | 25.1 | 24   |  |  |  |  | 26.8 | 32   | 32.5 | 42.2 |
| 64 | 1530 | 26.4 | 25.8 | 24.9 | 23.7 |  |  |  |  | 27.7 | 34.1 | 32.9 | 43   |
| 64 | 1531 | 26.3 | 25.6 | 24.4 | 23.5 |  |  |  |  | 28.1 | 35   | 32.2 | 41.6 |
| 64 | 1532 | 26   | 25.2 | 24.2 | 22.7 |  |  |  |  | 27.6 | 34   | 30.9 | 38.6 |
| 64 | 1533 | 25.9 | 25.1 | 24   | 22.4 |  |  |  |  | 27.1 | 32.8 | 29.1 | 34.4 |
| 64 | 1534 | 25.8 | 24.9 | 23.9 | 22.1 |  |  |  |  | 26.3 | 30.8 | 27.3 | 30.3 |
| 64 | 1535 | 25.7 | 24.8 | 24   | 21.9 |  |  |  |  | 25.3 | 28.5 | 25.7 | 26.5 |
| 64 | 1536 | 25.8 | 24.9 | 25.6 | 22.1 |  |  |  |  | 24.3 | 26.3 | 24.2 | 23.2 |
| 65 | 1537 | 25.9 | 25.8 | 26   | 25.3 |  |  |  |  | 23.5 | 24.6 | 23.1 | 19.1 |
| 65 | 1538 | 26.1 | 26   | 26.7 | 25.9 |  |  |  |  | 22.7 | 22.8 | 22   | 16.7 |
| 65 | 1539 | 26.5 | 26.6 | 27.6 | 26.9 |  |  |  |  | 22   | 21.3 | 21.1 | 14.6 |
| 65 | 1540 | 27   | 27.3 | 28.3 | 28.3 |  |  |  |  | 21.4 | 19.9 | 20.3 | 12.8 |
| 65 | 1541 | 27.4 | 27.9 | 29.1 | 29.3 |  |  |  |  | 20.9 | 18.6 | 19.6 | 11.2 |
| 65 | 1542 | 27.8 | 28.4 | 29.1 | 30.4 |  |  |  |  | 20.4 | 17.5 | 18.9 | 9.6  |
| 65 | 1543 | 27.8 | 28.4 | 28.3 | 30.4 |  |  |  |  | 20   | 16.6 | 18.4 | 8.3  |
| 65 | 1544 | 27.4 | 27.9 | 28.2 | 29.3 |  |  |  |  | 19.6 | 15.7 | 17.9 | 7.2  |
| 65 | 1545 | 27.3 | 27.7 | 27.6 | 29.1 |  |  |  |  | 19.2 | 14.8 | 17.5 | 6.3  |
| 65 | 1546 | 27   | 27.3 | 27.3 | 28.3 |  |  |  |  | 18.9 | 14.1 | 18.1 | 7.7  |
| 65 | 1547 | 26.8 | 27   | 26.9 | 27.7 |  |  |  |  | 18.8 | 13.8 | 20.2 | 12.6 |
| 65 | 1548 | 26.6 | 26.7 | 26.4 | 27.2 |  |  |  |  | 19   | 14.4 | 23.7 | 20.5 |
| 65 | 1549 | 26.3 | 26.3 | 26   | 26.4 |  |  |  |  | 20.2 | 16.9 | 27.6 | 29.6 |
| 65 | 1550 | 26.1 | 26   | 25.5 | 25.9 |  |  |  |  | 21.8 | 20.8 | 31.2 | 37.9 |
| 65 | 1551 | 25.8 | 25.6 | 25.3 | 25.1 |  |  |  |  | 22.9 | 23.3 | 33.8 | 43.8 |
| 65 | 1552 | 25.7 | 25.5 | 25.1 | 24.8 |  |  |  |  | 24.5 | 27   | 35   | 46.5 |
| 65 | 1553 | 25.6 | 25.3 | 24.9 | 24.5 |  |  |  |  | 25.9 | 30.2 | 36   | 48.8 |

|    |      |      |      |      |      |  |  |  |  |      |      |      |      |
|----|------|------|------|------|------|--|--|--|--|------|------|------|------|
| 65 | 1554 | 25.5 | 25.2 | 24.6 | 24.3 |  |  |  |  | 26.8 | 32.2 | 36   | 48.8 |
| 65 | 1555 | 25.3 | 24.9 | 24.6 | 23.8 |  |  |  |  | 27.2 | 33.1 | 35.1 | 46.8 |
| 65 | 1556 | 25.3 | 24.9 | 24.2 | 23.8 |  |  |  |  | 27.1 | 32.9 | 33.7 | 43.7 |
| 65 | 1557 | 25.1 | 24.6 | 24.2 | 23.2 |  |  |  |  | 26.3 | 31.1 | 31.9 | 39.4 |
| 65 | 1558 | 25.1 | 24.6 | 24.2 | 23.2 |  |  |  |  | 25.5 | 29.2 | 30   | 35.1 |
| 65 | 1559 | 25.1 | 24.6 | 24.2 | 23.2 |  |  |  |  | 24.5 | 27   | 28.3 | 31.2 |
| 65 | 1560 | 25.1 | 24.6 | 24.7 | 23.2 |  |  |  |  | 23.8 | 25.2 | 26.9 | 27.9 |
| 66 | 1561 | 25.3 | 25   | 24.7 | 24.1 |  |  |  |  | 23.1 | 24   | 25.7 | 29.7 |
| 66 | 1562 | 25.3 | 25   | 25.1 | 24.1 |  |  |  |  | 22.5 | 22.6 | 24.6 | 27.2 |
| 66 | 1563 | 25.5 | 25.3 | 25.6 | 24.7 |  |  |  |  | 21.9 | 21.3 | 23.7 | 25.1 |
| 66 | 1564 | 25.8 | 25.7 | 26.9 | 25.5 |  |  |  |  | 21.5 | 20.3 | 23.1 | 23.6 |
| 66 | 1565 | 26.5 | 26.7 | 28.2 | 27.3 |  |  |  |  | 21   | 19.3 | 22.5 | 22.3 |
| 66 | 1566 | 27.2 | 27.7 | 28.5 | 29.2 |  |  |  |  | 20.7 | 18.4 | 21.9 | 21.1 |
| 66 | 1567 | 27.4 | 28   | 28.7 | 29.7 |  |  |  |  | 20.4 | 17.8 | 21.5 | 20   |
| 66 | 1568 | 27.5 | 28.1 | 28.5 | 30   |  |  |  |  | 20.1 | 17.1 | 21   | 18.9 |
| 66 | 1569 | 27.4 | 28   | 28.3 | 29.7 |  |  |  |  | 19.7 | 16.3 | 20.6 | 18   |
| 66 | 1570 | 27.3 | 27.8 | 28   | 29.5 |  |  |  |  | 19.4 | 15.5 | 21.1 | 19   |
| 66 | 1571 | 27.1 | 27.5 | 27.4 | 28.9 |  |  |  |  | 19.2 | 15.1 | 22.1 | 21.5 |
| 66 | 1572 | 26.8 | 27.1 | 27.1 | 28.1 |  |  |  |  | 19.3 | 15.3 | 23.3 | 24.2 |
| 66 | 1573 | 26.6 | 26.8 | 26.5 | 27.6 |  |  |  |  | 20.1 | 17.1 | 23.2 | 24.1 |
| 66 | 1574 | 26.3 | 26.4 | 26.2 | 26.8 |  |  |  |  | 20.9 | 18.9 | 22.4 | 22.1 |
| 66 | 1575 | 26.1 | 26.1 | 25.8 | 26.3 |  |  |  |  | 21.8 | 21.1 | 22.3 | 21.9 |
| 66 | 1576 | 25.9 | 25.9 | 25.5 | 25.7 |  |  |  |  | 23.6 | 25.2 | 23.2 | 24.1 |
| 66 | 1577 | 25.7 | 25.6 | 24.9 | 25.2 |  |  |  |  | 24.6 | 27.4 | 23.6 | 24.8 |
| 66 | 1578 | 25.4 | 25.2 | 24.6 | 24.4 |  |  |  |  | 25.4 | 29.3 | 23.6 | 24.8 |
| 66 | 1579 | 25.2 | 24.9 | 24   | 23.9 |  |  |  |  | 26   | 30.8 | 23.2 | 24.1 |
| 66 | 1580 | 24.9 | 24.5 | 23.8 | 23.1 |  |  |  |  | 26.2 | 31.3 | 23.1 | 23.8 |
| 66 | 1581 | 24.8 | 24.3 | 23.5 | 22.8 |  |  |  |  | 26   | 30.7 | 22.6 | 22.5 |
| 66 | 1582 | 24.6 | 24   | 23.5 | 22.3 |  |  |  |  | 25.3 | 29.1 | 21.9 | 20.9 |
| 66 | 1583 | 24.6 | 24   | 23.8 | 22.3 |  |  |  |  | 24.5 | 27.3 | 21.4 | 19.8 |
| 66 | 1584 | 24.8 | 24.3 | 24.2 | 22.8 |  |  |  |  | 23.6 | 25.3 | 21   | 18.9 |
| 67 | 1585 | 25.5 | 24.9 | 25.5 | 22.9 |  |  |  |  | 22.8 | 24.5 | 20.7 | 21.4 |
| 67 | 1586 | 26.2 | 25.8 | 27.3 | 24.7 |  |  |  |  | 22   | 22.6 | 20.4 | 20.7 |
| 67 | 1587 | 27.2 | 27.2 | 28.4 | 27.4 |  |  |  |  | 21.2 | 20.8 | 20.1 | 20.1 |
| 67 | 1588 | 27.8 | 28.1 | 29.8 | 29   |  |  |  |  | 20.7 | 19.5 | 19.6 | 18.9 |
| 67 | 1589 | 28.6 | 29.2 | 30.9 | 31.1 |  |  |  |  | 20.2 | 18.4 | 19   | 17.6 |
| 67 | 1590 | 29.2 | 30   | 30.9 | 32.7 |  |  |  |  | 19.7 | 17.1 | 18.6 | 16.6 |
| 67 | 1591 | 29.2 | 30   | 30.5 | 32.7 |  |  |  |  | 19.1 | 15.8 | 18.3 | 15.9 |
| 67 | 1592 | 29   | 29.8 | 30.2 | 32.2 |  |  |  |  | 18.6 | 14.6 | 18   | 15.3 |
| 67 | 1593 | 28.8 | 29.5 | 29.5 | 31.7 |  |  |  |  | 18.1 | 13.4 | 17.9 | 15.1 |
| 67 | 1594 | 28.4 | 28.9 | 28.9 | 30.6 |  |  |  |  | 17.6 | 12.5 | 18.2 | 15.6 |
| 67 | 1595 | 28.1 | 28.5 | 28.4 | 29.8 |  |  |  |  | 17.4 | 11.9 | 18.9 | 17.2 |
| 67 | 1596 | 27.8 | 28.1 | 28   | 29   |  |  |  |  | 17.5 | 12.1 | 19.8 | 19.4 |
| 67 | 1597 | 27.6 | 27.8 | 27.5 | 28.5 |  |  |  |  | 18.4 | 14.2 | 20.2 | 20.4 |
| 67 | 1598 | 27.3 | 27.4 | 26.8 | 27.7 |  |  |  |  | 19.9 | 17.6 | 20.6 | 21.2 |
| 67 | 1599 | 26.9 | 26.8 | 26.4 | 26.6 |  |  |  |  | 21.6 | 21.5 | 22.2 | 25   |
| 67 | 1600 | 26.7 | 26.5 | 25.9 | 26.1 |  |  |  |  | 23.2 | 25.2 | 24.2 | 29.6 |
| 67 | 1601 | 26.4 | 26.1 | 25.5 | 25.3 |  |  |  |  | 24.6 | 28.6 | 24.4 | 29.9 |
| 67 | 1602 | 26.2 | 25.8 | 25   | 24.7 |  |  |  |  | 25.7 | 30.9 | 23.2 | 27.3 |
| 67 | 1603 | 25.9 | 25.4 | 24.6 | 23.9 |  |  |  |  | 26.2 | 32.2 | 21.9 | 24.3 |
| 67 | 1604 | 25.7 | 25.1 | 24.1 | 23.4 |  |  |  |  | 26.2 | 32.2 | 20.9 | 21.8 |
| 67 | 1605 | 25.4 | 24.7 | 23.9 | 22.6 |  |  |  |  | 25.8 | 31.3 | 20.1 | 19.9 |
| 67 | 1606 | 25.3 | 24.6 | 23.9 | 22.3 |  |  |  |  | 25   | 29.5 | 19.2 | 18.1 |
| 67 | 1607 | 25.3 | 24.6 | 24.1 | 22.3 |  |  |  |  | 24.1 | 27.3 | 18.5 | 16.5 |
| 67 | 1608 | 25.4 | 24.7 | 24.7 | 22.6 |  |  |  |  | 23.2 | 25.3 | 18   | 15.3 |
| 68 | 1609 | 26   | 25.3 | 25.6 | 23.2 |  |  |  |  | 22.5 | 22.4 | 17.6 | 14   |
| 68 | 1610 | 26.5 | 26   | 26.8 | 24.5 |  |  |  |  | 21.8 | 20.8 | 17.4 | 13.4 |
| 68 | 1611 | 27.2 | 27   | 28.1 | 26.4 |  |  |  |  | 21.2 | 19.3 | 17.1 | 12.8 |
| 68 | 1612 | 27.9 | 28   | 29.7 | 28.3 |  |  |  |  | 20.6 | 18   | 16.9 | 12.2 |
| 68 | 1613 | 28.8 | 29.2 | 30.6 | 30.6 |  |  |  |  | 20   | 16.7 | 16.4 | 11.2 |
| 68 | 1614 | 29.3 | 29.9 | 30.8 | 32   |  |  |  |  | 19.5 | 15.6 | 15.9 | 9.9  |
| 68 | 1615 | 29.4 | 30.1 | 30.6 | 32.2 |  |  |  |  | 19.1 | 14.6 | 15.4 | 8.9  |
| 68 | 1616 | 29.3 | 29.9 | 30.6 | 32   |  |  |  |  | 18.7 | 13.7 | 15.3 | 8.6  |
| 68 | 1617 | 29.3 | 29.9 | 30.1 | 32   |  |  |  |  | 18.3 | 12.8 | 15.2 | 8.5  |
| 68 | 1618 | 29   | 29.5 | 29.7 | 31.2 |  |  |  |  | 18   | 12.1 | 15.5 | 9.1  |

|    |      |      |      |      |      |  |  |  |  |      |      |      |      |
|----|------|------|------|------|------|--|--|--|--|------|------|------|------|
| 68 | 1619 | 28.8 | 29.2 | 29.3 | 30.6 |  |  |  |  | 17.8 | 11.7 | 17.2 | 13   |
| 68 | 1620 | 28.6 | 29   | 28.8 | 30.1 |  |  |  |  | 18   | 12   | 19.7 | 18.9 |
| 68 | 1621 | 28.3 | 28.5 | 28.3 | 29.3 |  |  |  |  | 19   | 14.4 | 22.2 | 24.6 |
| 68 | 1622 | 28   | 28.1 | 27.7 | 28.5 |  |  |  |  | 21.1 | 19.1 | 23.9 | 28.5 |
| 68 | 1623 | 27.7 | 27.7 | 27.2 | 27.7 |  |  |  |  | 23.3 | 24.1 | 25.8 | 32.8 |
| 68 | 1624 | 27.4 | 27.3 | 27   | 26.9 |  |  |  |  | 25.3 | 28.7 | 26.2 | 33.7 |
| 68 | 1625 | 27.3 | 27.1 | 26.3 | 26.7 |  |  |  |  | 26.9 | 32.5 | 27   | 35.5 |
| 68 | 1626 | 26.9 | 26.6 | 26.1 | 25.6 |  |  |  |  | 27.6 | 34   | 27.9 | 37.7 |
| 68 | 1627 | 26.8 | 26.4 | 25.7 | 25.3 |  |  |  |  | 28.1 | 35.2 | 26.3 | 34   |
| 68 | 1628 | 26.6 | 26.2 | 25.4 | 24.8 |  |  |  |  | 28.3 | 35.7 | 24.7 | 30.4 |
| 68 | 1629 | 26.4 | 25.9 | 25.2 | 24.3 |  |  |  |  | 27.9 | 34.9 | 23.3 | 27.1 |
| 68 | 1630 | 26.3 | 25.7 | 25   | 24   |  |  |  |  | 27.2 | 33.2 | 22   | 24   |
| 68 | 1631 | 26.2 | 25.6 | 25.6 | 23.7 |  |  |  |  | 26.2 | 30.8 | 21   | 21.7 |
| 68 | 1632 | 26.5 | 26   | 25.9 | 24.5 |  |  |  |  | 25.1 | 28.4 | 19.9 | 19.3 |
| 69 | 1633 | 27   | 26.5 | 27.2 | 24.7 |  |  |  |  | 24.2 | 24.8 | 19   | 17.9 |
| 69 | 1634 | 27.7 | 27.4 | 28.4 | 26.6 |  |  |  |  | 23.4 | 22.9 | 18.4 | 16.6 |
| 69 | 1635 | 28.4 | 28.4 | 30   | 28.4 |  |  |  |  | 22.8 | 21.3 | 17.9 | 15.3 |
| 69 | 1636 | 29.3 | 29.7 | 30.9 | 30.8 |  |  |  |  | 22.1 | 19.9 | 17.2 | 13.7 |
| 69 | 1637 | 29.8 | 30.4 | 32   | 32.2 |  |  |  |  | 21.6 | 18.6 | 16.5 | 12.1 |
| 69 | 1638 | 30.4 | 31.2 | 32   | 33.8 |  |  |  |  | 21.1 | 17.5 | 15.9 | 10.7 |
| 69 | 1639 | 30.4 | 31.2 | 31.8 | 33.8 |  |  |  |  | 20.6 | 16.5 | 15.4 | 9.5  |
| 69 | 1640 | 30.3 | 31.1 | 31.3 | 33.5 |  |  |  |  | 20.2 | 15.5 | 15   | 8.8  |
| 69 | 1641 | 30   | 30.7 | 30.9 | 32.7 |  |  |  |  | 19.8 | 14.7 | 15   | 8.8  |
| 69 | 1642 | 29.8 | 30.4 | 30.6 | 32.2 |  |  |  |  | 19.5 | 13.9 | 15.3 | 9.4  |
| 69 | 1643 | 29.6 | 30.1 | 30   | 31.6 |  |  |  |  | 19.4 | 13.6 | 15.9 | 10.7 |
| 69 | 1644 | 29.3 | 29.7 | 29.7 | 30.8 |  |  |  |  | 19.5 | 13.8 | 16.5 | 12.3 |
| 69 | 1645 | 29.1 | 29.4 | 29.1 | 30.3 |  |  |  |  | 20.2 | 15.4 | 18.2 | 16   |
| 69 | 1646 | 28.8 | 29   | 28.2 | 29.5 |  |  |  |  | 21.9 | 19.4 | 20.9 | 22.2 |
| 69 | 1647 | 28.3 | 28.3 | 27.7 | 28.2 |  |  |  |  | 23.9 | 24.1 | 24.2 | 29.8 |
| 69 | 1648 | 28   | 27.9 | 27.2 | 27.4 |  |  |  |  | 25.9 | 28.6 | 26.4 | 34.9 |
| 69 | 1649 | 27.7 | 27.4 | 26.6 | 26.6 |  |  |  |  | 27.5 | 32.3 | 25.9 | 33.8 |
| 69 | 1650 | 27.4 | 27   | 25.9 | 25.8 |  |  |  |  | 28.6 | 34.7 | 25.4 | 32.6 |
| 69 | 1651 | 27   | 26.5 | 25.5 | 24.7 |  |  |  |  | 29.1 | 36   | 24.9 | 31.5 |
| 69 | 1652 | 26.8 | 26.2 | 25   | 24.2 |  |  |  |  | 29.2 | 36.2 | 24.5 | 30.5 |
| 69 | 1653 | 26.5 | 25.8 | 24.8 | 23.4 |  |  |  |  | 28.9 | 35.4 | 23.5 | 28.2 |
| 69 | 1654 | 26.4 | 25.6 | 24.6 | 23.1 |  |  |  |  | 28.2 | 33.8 | 22.4 | 25.7 |
| 69 | 1655 | 26.3 | 25.5 | 25.2 | 22.9 |  |  |  |  | 27.4 | 31.9 | 21.4 | 23.5 |
| 69 | 1656 | 26.6 | 25.9 | 26   | 23.7 |  |  |  |  | 26.5 | 30   | 20.6 | 21.5 |
| 70 | 1657 | 26.8 | 26.4 | 26.9 | 25.1 |  |  |  |  | 25.8 | 27.3 | 19.9 | 20.9 |
| 70 | 1658 | 27.3 | 27.1 | 28   | 26.4 |  |  |  |  | 25.2 | 25.9 | 19.4 | 19.6 |
| 70 | 1659 | 27.9 | 27.9 | 28.9 | 28   |  |  |  |  | 24.6 | 24.6 | 19   | 18.7 |
| 70 | 1660 | 28.4 | 28.6 | 29.8 | 29.4 |  |  |  |  | 24.1 | 23.3 | 18.7 | 18   |
| 70 | 1661 | 28.9 | 29.3 | 30.7 | 30.7 |  |  |  |  | 23.6 | 22.2 | 18.4 | 17.3 |
| 70 | 1662 | 29.4 | 30   | 30.8 | 32   |  |  |  |  | 23.2 | 21.3 | 18.1 | 16.7 |
| 70 | 1663 | 29.5 | 30.2 | 30.5 | 32.3 |  |  |  |  | 22.8 | 20.4 | 17.9 | 16.3 |
| 70 | 1664 | 29.3 | 29.9 | 30.1 | 31.7 |  |  |  |  | 22.4 | 19.5 | 17.8 | 16   |
| 70 | 1665 | 29.1 | 29.6 | 29.8 | 31.2 |  |  |  |  | 22.1 | 18.8 | 17.8 | 16   |
| 70 | 1666 | 28.9 | 29.3 | 29.6 | 30.7 |  |  |  |  | 21.7 | 18   | 18.2 | 16.9 |
| 70 | 1667 | 28.8 | 29.2 | 29.2 | 30.4 |  |  |  |  | 21.7 | 17.8 | 18.7 | 18   |
| 70 | 1668 | 28.6 | 28.9 |      | 29.9 |  |  |  |  | 21.7 | 17.9 | 18.9 | 18.6 |
| 70 | 1669 | 28.3 | 28.5 |      | 29.1 |  |  |  |  | 21.8 | 18.1 | 19   | 18.7 |
| 70 | 1670 | 28   | 28.1 |      | 28.3 |  |  |  |  | 22.1 | 18.8 | 19.2 | 19.2 |
| 70 | 1671 | 27.8 | 27.8 |      | 27.8 |  |  |  |  | 23.1 | 21.2 | 19.2 | 19.3 |
| 70 | 1672 | 27.6 | 27.5 |      | 27.2 |  |  |  |  | 25.1 | 25.8 | 19.4 | 19.6 |
| 70 | 1673 | 27.3 | 27.1 |      | 26.4 |  |  |  |  | 26.8 | 29.6 | 19.5 | 19.9 |
| 70 | 1674 | 27.1 | 26.8 |      | 25.9 |  |  |  |  | 28   | 32.4 | 19.8 | 20.6 |
| 70 | 1675 | 26.9 | 26.5 |      | 25.4 |  |  |  |  | 28.5 | 33.6 | 20.6 | 22.3 |
| 70 | 1676 | 26.7 | 26.3 |      | 24.8 |  |  |  |  | 28.5 | 33.5 | 20.6 | 22.5 |
| 70 | 1677 | 26.4 | 25.8 |      | 24   |  |  |  |  | 27.9 | 32.2 | 20.4 | 22   |
| 70 | 1678 | 26.3 | 25.7 |      | 23.8 |  |  |  |  | 27.4 | 30.9 | 20.2 | 21.6 |
| 70 | 1679 | 26.2 | 25.6 |      | 23.5 |  |  |  |  | 26.7 | 29.4 | 20   | 21   |
| 70 | 1680 | 26.3 | 25.7 |      | 23.8 |  |  |  |  | 26.1 | 28   | 19.9 | 20.7 |
| 71 | 1681 | 26.6 | 25.9 |      | 23.7 |  |  |  |  | 25.6 | 26.8 | 19.7 | 17.8 |
| 71 | 1682 | 27.3 | 26.9 |      | 25.6 |  |  |  |  | 25.2 | 25.8 | 19.4 | 17.2 |
| 71 | 1683 | 27.9 | 27.7 |      | 27.2 |  |  |  |  | 24.8 | 25.1 | 19.2 | 16.6 |

|    |      |      |      |  |      |  |  |  |      |      |      |      |
|----|------|------|------|--|------|--|--|--|------|------|------|------|
| 71 | 1684 | 28.8 | 29   |  | 29.6 |  |  |  | 24.5 | 24.3 | 19   | 16.2 |
| 71 | 1685 | 29.8 | 30.4 |  | 32.2 |  |  |  | 24.1 | 23.4 | 18.7 | 15.5 |
| 71 | 1686 | 30.3 | 31.1 |  | 33.6 |  |  |  | 23.8 | 22.6 | 18.3 | 14.6 |
| 71 | 1687 | 30.2 | 31   |  | 33.3 |  |  |  | 23.4 | 21.8 | 18.2 | 14.3 |
| 71 | 1688 | 30   | 30.7 |  | 32.8 |  |  |  | 23.1 | 21.1 | 18   | 14   |
| 71 | 1689 | 29.8 | 30.4 |  | 32.2 |  |  |  | 22.9 | 20.5 | 18   | 13.9 |
| 71 | 1690 | 29.6 | 30.1 |  | 31.7 |  |  |  | 22.7 | 20   | 18.2 | 14.5 |
| 71 | 1691 | 29.4 | 29.8 |  | 31.2 |  |  |  | 22.6 | 19.8 | 19   | 16.3 |
| 71 | 1692 | 29.1 | 29.4 |  | 30.4 |  |  |  | 22.7 | 20.2 | 19.9 | 18.4 |
| 71 | 1693 | 28.8 | 29   |  | 29.6 |  |  |  | 23.2 | 21.2 | 22   | 23.1 |
| 71 | 1694 | 28.5 | 28.6 |  | 28.8 |  |  |  | 24   | 23   | 24.6 | 29.2 |
| 71 | 1695 | 28.3 | 28.3 |  | 28.3 |  |  |  | 24.5 | 24.2 | 25.5 | 31.2 |
| 71 | 1696 | 28.1 | 28   |  | 27.7 |  |  |  | 25.3 | 26.1 | 26.1 | 32.5 |
| 71 | 1697 | 27.8 | 27.6 |  | 26.9 |  |  |  | 26.1 | 28   | 26.1 | 32.5 |
| 71 | 1698 | 27.6 | 27.3 |  | 26.4 |  |  |  | 26.5 | 28.7 | 25   | 30   |
| 71 | 1699 | 27.4 | 27   |  | 25.9 |  |  |  | 26.8 | 29.5 | 24   | 27.7 |
| 71 | 1700 | 27.2 | 26.8 |  | 25.3 |  |  |  | 27   | 30.1 | 23.2 | 25.8 |
| 71 | 1701 | 26.9 | 26.3 |  | 24.5 |  |  |  | 27   | 29.9 | 22.4 | 24   |
| 71 | 1702 | 26.8 | 26.2 |  | 24.3 |  |  |  | 26.6 | 29   | 21.6 | 22.1 |
| 71 | 1703 | 26.8 | 26.2 |  | 24.3 |  |  |  | 25.8 | 27.3 | 20.8 | 20.4 |
| 71 | 1704 | 26.8 | 26.2 |  | 24.3 |  |  |  | 24.7 | 24.8 | 20.3 | 19.2 |
| 72 | 1705 | 27.1 | 26.5 |  |      |  |  |  | 24   | 24.7 | 19.8 | 16.5 |
| 72 | 1706 | 27.5 | 27.1 |  |      |  |  |  | 23.5 | 23.6 | 18.9 | 14.5 |
| 72 | 1707 | 28.2 | 28   |  |      |  |  |  | 23.1 | 22.6 | 18   | 12.5 |
| 72 | 1708 | 28.8 | 28.9 |  |      |  |  |  | 22.8 | 21.9 | 17.2 | 10.6 |
| 72 | 1709 | 29.8 | 30.3 |  |      |  |  |  | 22.5 | 21.2 | 16.4 | 8.7  |
| 72 | 1710 | 30.2 | 30.8 |  |      |  |  |  | 22.2 | 20.6 | 15.7 | 7.2  |
| 72 | 1711 | 30.3 | 31   |  |      |  |  |  | 21.9 | 19.8 | 15.2 | 6    |
| 72 | 1712 | 30.2 | 30.8 |  |      |  |  |  | 21.5 | 18.9 | 14.9 | 5.1  |
| 72 | 1713 | 30   | 30.6 |  |      |  |  |  | 21.2 | 18.4 | 14.5 | 4.4  |
| 72 | 1714 | 29.8 | 30.3 |  |      |  |  |  | 21   | 17.9 | 14.9 | 5.1  |
| 72 | 1715 | 29.6 | 30   |  |      |  |  |  | 21   | 17.8 | 16.5 | 9    |
| 72 | 1716 | 29.3 | 29.6 |  |      |  |  |  | 21.2 | 18.2 | 19.5 | 15.8 |
| 72 | 1717 | 29.1 | 29.3 |  |      |  |  |  | 21.7 | 19.4 | 22.6 | 23   |
| 72 | 1718 | 28.8 | 28.9 |  |      |  |  |  | 22.3 | 20.8 | 25.7 | 30.2 |
| 72 | 1719 | 28.6 | 28.6 |  |      |  |  |  | 23.1 | 22.6 | 28.8 | 37.2 |
| 72 | 1720 | 28.4 | 28.3 |  |      |  |  |  | 24.3 | 25.4 | 31   | 42.2 |
| 72 | 1721 | 28.3 | 28.2 |  |      |  |  |  | 24.8 | 26.6 | 32.4 | 45.4 |
| 72 | 1722 | 28.1 | 27.9 |  |      |  |  |  | 25.8 | 28.8 | 32.7 | 46.1 |
| 72 | 1723 | 27.8 | 27.5 |  |      |  |  |  | 26.5 | 30.5 | 31.3 | 43   |
| 72 | 1724 | 27.7 | 27.3 |  |      |  |  |  | 26.7 | 30.9 | 29.6 | 39.1 |
| 72 | 1725 | 27.5 | 27.1 |  |      |  |  |  | 26.6 | 30.7 | 27.6 | 34.3 |
| 72 | 1726 | 27.3 | 26.8 |  |      |  |  |  | 25.9 | 29   | 25.7 | 30.2 |
| 72 | 1727 | 27.3 | 26.8 |  |      |  |  |  | 25.2 | 27.4 | 24.1 | 26.3 |
| 72 | 1728 | 27.2 | 26.6 |  |      |  |  |  | 24.6 | 26   | 22.7 | 23.1 |
| 73 | 1729 | 27.1 | 27.5 |  |      |  |  |  | 23.9 | 24.3 | 21.7 | 19.7 |
| 73 | 1730 | 27.1 | 27.5 |  |      |  |  |  | 23.3 | 22.9 | 20.9 | 17.9 |
| 73 | 1731 | 26.9 | 27.2 |  |      |  |  |  | 22.8 | 21.8 | 20.2 | 16.3 |
| 73 | 1732 | 26.8 | 27.1 |  |      |  |  |  | 22.3 | 20.8 | 19.7 | 15.1 |
| 73 | 1733 | 26.5 | 26.7 |  |      |  |  |  | 22   | 20   | 19.2 | 13.9 |
| 73 | 1734 | 26.8 | 27.1 |  |      |  |  |  | 21.7 | 19.2 | 18.7 | 12.7 |
| 73 | 1735 | 27.1 | 27.5 |  |      |  |  |  | 21.3 | 18.5 | 18.3 | 11.9 |
| 73 | 1736 | 27.1 | 27.5 |  |      |  |  |  | 21.1 | 17.9 | 17.9 | 11   |
| 73 | 1737 | 27.1 | 27.5 |  |      |  |  |  | 20.8 | 17.2 | 17.7 | 10.6 |
| 73 | 1738 | 27.1 | 27.5 |  |      |  |  |  | 20.6 | 16.7 | 18.1 | 11.5 |
| 73 | 1739 | 26.9 | 27.2 |  |      |  |  |  | 20.4 | 16.4 | 19.2 | 13.9 |
| 73 | 1740 | 26.8 | 27.1 |  |      |  |  |  | 20.5 | 16.5 | 20.7 | 17.4 |
| 73 | 1741 | 26.5 | 26.7 |  |      |  |  |  | 21.3 | 18.4 | 22.4 | 21.4 |
| 73 | 1742 | 26.3 | 26.4 |  |      |  |  |  | 22.8 | 21.7 | 25.1 | 27.6 |
| 73 | 1743 | 25.9 | 25.8 |  |      |  |  |  | 24.4 | 25.6 | 27.2 | 32.3 |
| 73 | 1744 | 25.8 | 25.7 |  |      |  |  |  | 25.9 | 29.1 | 29.1 | 36.8 |
| 73 | 1745 | 25.4 | 25.1 |  |      |  |  |  | 27   | 31.6 | 30   | 38.8 |
| 73 | 1746 | 25.2 | 24.9 |  |      |  |  |  | 27.8 | 33.2 | 30.2 | 39.2 |
| 73 | 1747 | 24.9 | 24.4 |  |      |  |  |  | 28.3 | 34.4 | 30   | 38.8 |
| 73 | 1748 | 24.8 | 24.3 |  |      |  |  |  | 27.3 | 32.1 | 29.1 | 36.6 |

|    |      |      |      |  |  |  |  |  |      |      |      |      |
|----|------|------|------|--|--|--|--|--|------|------|------|------|
| 73 | 1749 | 24.4 | 23.7 |  |  |  |  |  | 26.1 | 29.4 | 27.6 | 33.3 |
| 73 | 1750 | 24.4 | 23.7 |  |  |  |  |  | 25.2 | 27.3 | 26.1 | 29.9 |
| 73 | 1751 | 24.2 | 23.5 |  |  |  |  |  | 24.5 | 25.7 | 24.8 | 26.8 |
| 73 | 1752 | 24.3 | 23.6 |  |  |  |  |  | 23.8 | 24.2 | 23.7 | 24.3 |
| 74 | 1753 | 24.3 |      |  |  |  |  |  | 23.2 | 21.4 | 22.8 | 25.4 |
| 74 | 1754 | 24.9 |      |  |  |  |  |  | 22.6 | 20   | 22.1 | 23.8 |
| 74 | 1755 | 25.5 |      |  |  |  |  |  | 22.1 | 18.8 | 21.4 | 22.2 |
| 74 | 1756 | 26.2 |      |  |  |  |  |  | 21.7 | 17.9 | 20.9 | 21   |
| 74 | 1757 | 26.9 |      |  |  |  |  |  | 21.4 | 17.3 | 20.2 | 19.5 |
| 74 | 1758 | 27.3 |      |  |  |  |  |  | 21.3 | 16.9 | 19.7 | 18.2 |
| 74 | 1759 | 27.3 |      |  |  |  |  |  | 21.1 | 16.6 | 19.2 | 17.1 |
| 74 | 1760 | 27.1 |      |  |  |  |  |  | 21   | 16.3 | 18.7 | 16.1 |
| 74 | 1761 | 26.8 |      |  |  |  |  |  | 20.7 | 15.7 | 18.4 | 15.2 |
| 74 | 1762 | 26.8 |      |  |  |  |  |  | 20.6 | 15.3 | 18.3 | 15.1 |
| 74 | 1763 | 26.6 |      |  |  |  |  |  | 20.6 | 15.4 | 18.8 | 16.2 |
| 74 | 1764 | 26.3 |      |  |  |  |  |  | 20.9 | 16.2 | 19.7 | 18.2 |
| 74 | 1765 | 25.9 |      |  |  |  |  |  | 21.7 | 17.9 | 20.5 | 20.1 |
| 74 | 1766 | 25.8 |      |  |  |  |  |  | 23.6 | 22.3 | 21.1 | 21.4 |
| 74 | 1767 | 25.4 |      |  |  |  |  |  | 25.7 | 27   | 21.7 | 22.8 |
| 74 | 1768 | 25.2 |      |  |  |  |  |  | 27.6 | 31.4 | 22.2 | 24.1 |
| 74 | 1769 | 24.9 |      |  |  |  |  |  | 29   | 34.8 | 23.2 | 26.4 |
| 74 | 1770 | 24.7 |      |  |  |  |  |  | 30   | 36.9 | 23.5 | 27   |
| 74 | 1771 | 24.4 |      |  |  |  |  |  | 30.5 | 38.1 | 23.1 | 26.1 |
| 74 | 1772 | 24   |      |  |  |  |  |  | 30.4 | 38   | 22.6 | 25   |
| 74 | 1773 | 23.9 |      |  |  |  |  |  | 29.9 | 36.7 | 21.7 | 23   |
| 74 | 1774 | 23.6 |      |  |  |  |  |  | 29   | 34.7 | 20.7 | 20.5 |
| 74 | 1775 | 23.5 |      |  |  |  |  |  | 28   | 32.5 | 19.7 | 18.2 |
| 74 | 1776 | 23.4 |      |  |  |  |  |  | 27.1 | 30.2 | 18.9 | 16.3 |
| 75 | 1777 |      |      |  |  |  |  |  |      | 27.9 | 17.9 | 14.1 |
| 75 | 1778 |      |      |  |  |  |  |  |      | 26.2 | 17.2 | 12.4 |
| 75 | 1779 |      |      |  |  |  |  |  |      | 24.6 | 16.5 | 10.8 |
| 75 | 1780 |      |      |  |  |  |  |  |      | 23.1 | 15.8 | 9.2  |
| 75 | 1781 |      |      |  |  |  |  |  |      | 21.8 | 15.2 | 7.9  |
| 75 | 1782 |      |      |  |  |  |  |  |      | 20.6 | 14.7 | 6.6  |
| 75 | 1783 |      |      |  |  |  |  |  |      | 19.4 | 14.2 | 5.5  |
| 75 | 1784 |      |      |  |  |  |  |  |      | 18.4 | 13.7 | 4.3  |
| 75 | 1785 |      |      |  |  |  |  |  |      | 17.4 | 13.4 | 3.6  |
| 75 | 1786 |      |      |  |  |  |  |  |      | 16.5 | 13.7 | 4.3  |
| 75 | 1787 |      |      |  |  |  |  |  |      | 15.9 | 15.6 | 8.8  |
| 75 | 1788 |      |      |  |  |  |  |  |      | 15.8 | 19   | 16.6 |
| 75 | 1789 |      |      |  |  |  |  |  |      | 17.1 | 22   | 23.5 |
| 75 | 1790 |      |      |  |  |  |  |  |      | 20.8 | 24.6 | 29.4 |
| 75 | 1791 |      |      |  |  |  |  |  |      | 24.8 | 27   | 35   |
| 75 | 1792 |      |      |  |  |  |  |  |      | 28.6 | 28.8 | 39.2 |
| 75 | 1793 |      |      |  |  |  |  |  |      | 31.6 | 29.8 | 41.5 |
| 75 | 1794 |      |      |  |  |  |  |  |      | 34   | 29.6 | 40.9 |
| 75 | 1795 |      |      |  |  |  |  |  |      | 35   | 28.8 | 39.2 |
| 75 | 1796 |      |      |  |  |  |  |  |      | 35   | 27.7 | 36.7 |
| 75 | 1797 |      |      |  |  |  |  |  |      | 33.8 | 26.1 | 32.8 |
| 75 | 1798 |      |      |  |  |  |  |  |      | 31.9 | 24.4 | 29.1 |
| 75 | 1799 |      |      |  |  |  |  |  |      | 29.7 | 22.9 | 25.6 |
| 75 | 1800 |      |      |  |  |  |  |  |      | 27.6 | 21.8 | 23.1 |
| 76 | 1801 |      |      |  |  |  |  |  |      | 27.1 | 20.7 | 17.7 |
| 76 | 1802 |      |      |  |  |  |  |  |      | 25.5 | 20.1 | 16.1 |
| 76 | 1803 |      |      |  |  |  |  |  |      | 24   | 19.6 | 15   |
| 76 | 1804 |      |      |  |  |  |  |  |      | 22.6 | 19.2 | 14.2 |
| 76 | 1805 |      |      |  |  |  |  |  |      | 21.3 | 18.9 | 13.4 |
| 76 | 1806 |      |      |  |  |  |  |  |      | 20.1 | 18.5 | 12.7 |
| 76 | 1807 |      |      |  |  |  |  |  |      | 19.1 | 18.2 | 11.9 |
| 76 | 1808 |      |      |  |  |  |  |  |      | 18.1 | 18   | 11.4 |
| 76 | 1809 |      |      |  |  |  |  |  |      | 17.2 | 17.9 | 11.1 |
| 76 | 1810 |      |      |  |  |  |  |  |      | 16.5 | 18   | 11.5 |
| 76 | 1811 |      |      |  |  |  |  |  |      | 16.5 | 19.4 | 14.7 |
| 76 | 1812 |      |      |  |  |  |  |  |      | 17   | 21.7 | 19.9 |
| 76 | 1813 |      |      |  |  |  |  |  |      | 18   | 23.6 | 24.2 |
